# Supplementary material
Source: publisher figshare collection journal article supplement (https://acs.figshare.com/ndownloader/files/5503688)

## Supporting Information

### **Palladium-Catalyzed 6-Endo Selective Alkyl-Heck Reactions: Access to 5-Phenyl-1,2,3,6-Tetrahydropyridine Derivatives**

Xu Dong,<sup>†</sup> Ying Han,<sup>†</sup> Fachao Yan,<sup>†</sup> Qing Liu,<sup>\*,†</sup> Ping Wang,<sup>†</sup> Kexun Chen,<sup>†</sup> Yueyun Li,<sup>†</sup> Zengdian Zhao,<sup>†</sup> Yunhui Dong<sup>†</sup> and Hui Liu<sup>\*,†,‡</sup>

<sup>†</sup> School of Chemical Engineering, Shandong University of Technology, 266 West Xincun Road, Zibo 255049, P. R. China

<sup>‡</sup> College of Materials Science and Engineering, Hunan University, Changsha, Hunan 410082, China

\*E-mail: huiliu1030@sdut.edu.cn.

## Table of Contents

|             |                                                                                                                     |       |            |
|-------------|---------------------------------------------------------------------------------------------------------------------|-------|------------|
| <b>I.</b>   | <b>General Information</b>                                                                                          | ..... | <b>S3</b>  |
| <b>II.</b>  | <b>Representative Bioactive<br/>Molecules Built on 5-Phenyl-<br/>1,2,3,6-Tetrahydropyridine Core<br/>Scaffold</b>   | ..... | <b>S4</b>  |
| <b>III.</b> | <b>The General Synthetic Procedure<br/>and Analytical Data for<br/>Unactivated Alkyl Iodides</b>                    | ..... | <b>S5</b>  |
| <b>IV.</b>  | <b>The General Synthetic Procedure<br/>and Analytical Data for 5-phenyl-<br/>1-tosyl-1,2,3,6-tetrahydropyridine</b> | ..... | <b>S12</b> |
| <b>V.</b>   | <b>The Synthetic Procedure and<br/>Analytical Data for Deuterium-<br/>Substrate</b>                                 | ..... | <b>S19</b> |
| <b>VI.</b>  | <b>The Synthetic Procedure and<br/>Analytical Data for TEMPO<br/>Adduct</b>                                         | ..... | <b>S21</b> |
| <b>VII.</b> | <b>Copies of the <sup>1</sup>H NMR, <sup>13</sup>C<br/>NMR, <sup>19</sup>F NMR</b>                                  | ..... | <b>S22</b> |

## **I. General Information**

Organic solvents (Aldrich) were used without further purification. Purifications of reactions products were carried out by flash chromatography using Merck silica gel (40-63  $\mu\text{m}$ ).  $^1\text{H}$  NMR (400 MHz),  $^{13}\text{C}$  NMR (100 MHz) were measured on a Bruker Avance 400 MHz spectrometer. Chemical shifts are reported in parts per million (ppm,  $\delta$ ) downfield from residual solvents peaks and coupling constants are reported as Hertz (Hz). Splitting patterns are designated as singlet (s), doublet (d), triplet (t), .... Splitting patterns that could not be interpreted or easily visualized are designated as multiplet (m). Electrospray mass spectra were obtained using an ESI/TOF Mariner Mass Spectrometer. Unless otherwise noted, all other commercially available reagents and solvents were used without further purification.

## II. Representative Bioactive Molecules Built on 5-Phenyl-1,2,3,6-Tetrahydropyridine Core Scaffold

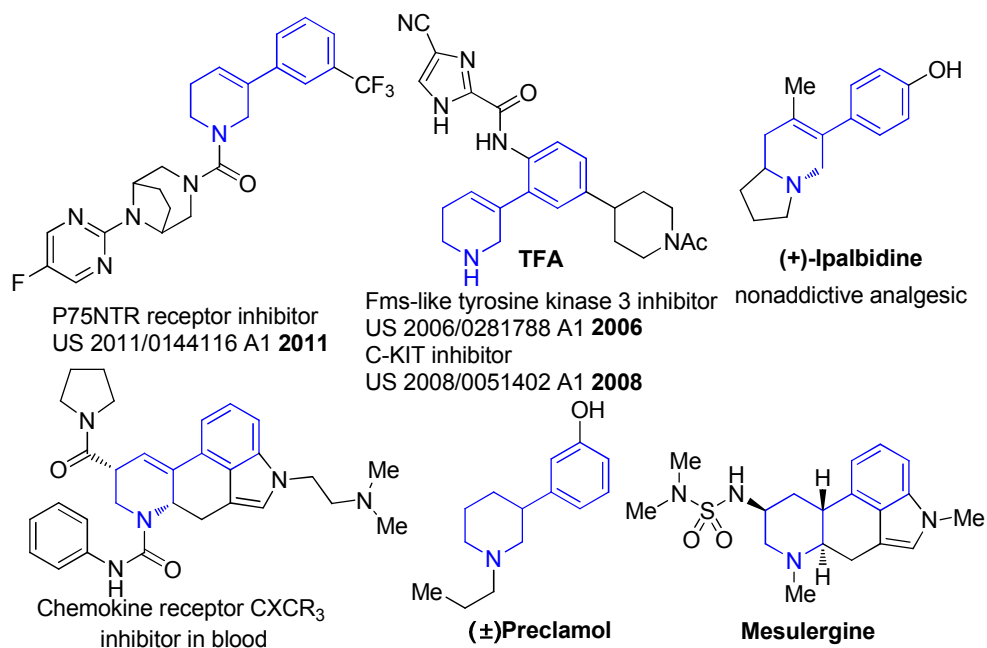

**Figure S1.** Representative Bioactive Molecules Built on 5-Phenyl-1,2,3,6-Tetrahydropyridine Core Scaffold

The 5-phenyl-1,2,3,6-tetrahydropyridine derivatives exist in numerous bioactivity molecules, such as P75NTR receptor inhibitor, Fms-like tyrosine kinase 3 inhibitor, C-KIT inhibitor, Chemokine receptor CXCR<sub>3</sub> inhibitor, and (+)-Ipalbidine. The reductive structure 3-arylpiperidines are also important classes of synthetic block, such as existing in (±)-Preclamol (the first autoreceptor-selective agonist) and Mesulergine (for the treatment of hyperprolactinemia, acromegaly and Parkinson's disease). Thus we envision this strategy may become a useful tool for bio- and medicinal chemistry.

### III. The General Synthetic Procedure and Analytical Data for Unactivated Alkyl Iodides

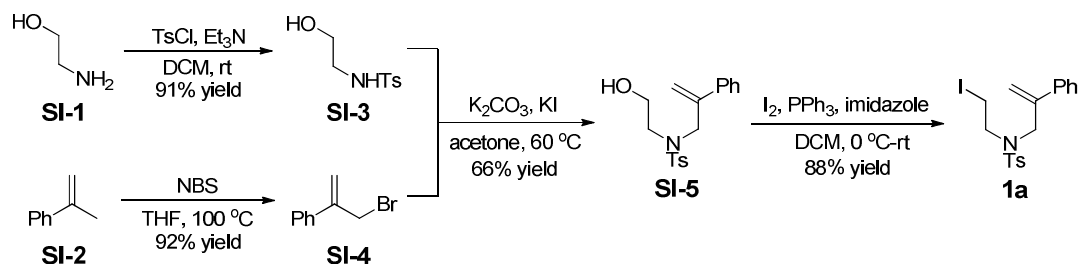

#### General Procedure:

**Preparation of alcohol SI-3:** To a solution of 2-Aminoethanol **SI-1** (12.2 g, 200 mmol, 1.0 equiv) in  $\text{DCM}$  (150 mL) at room temperature was added  $\text{TsCl}$  (38.0 g, 200 mmol, 1.0 equiv). Then a solution of triethylamine (22.2 g, 220 mmol, 1.1 equiv) in 50 mL  $\text{DCM}$  was added dropwise by constant pressure funnel under vigorous stirring. The mixture was stirred at room temperature over night and then washed with water (50 mL x 3). The organic layer was dried over  $\text{Na}_2\text{SO}_4$  and concentrated to afford the crude alcohol **SI-3** (39.3 g, 183 mmol, 91% yield) as a white solid, which was used without further purification.

**Preparation of bromide SI-4:** To a solution of alpha-methylstyrene (4.6 g, 39 mmol, 1.0 equiv) in 6 mL  $\text{CHCl}_3$  was added  $\text{NBS}$  (8.0 g, 45 mmol, 1.15 equiv). The mixture was stirred and heated to  $60^\circ\text{C}$  under reflux for 4 h. Then the reaction liquid was concentrated and petroleum ether was added. The precipitate that had formed was filtered off and then the organic layer was dried over  $\text{Na}_2\text{SO}_4$  and evaporated. The crude product was purified by column chromatography (PE only) to give the bromide **SI-4** (7.1 g, 36 mmol, 92% yield) as a light yellow liquid.

**Preparation of alcohol SI-5:** The **SI-3** (2.15 g, 10 mmol, 1.0 equiv) was dissolved in 40 mL acetone, and **SI-4** (2.36 g, 12 mmol, 1.2 equiv),  $\text{K}_2\text{CO}_3$  (1.66 g, 12 mmol, 1.2 equiv),  $\text{KI}$  (0.33 g, 2 mmol, 0.2 equiv) was added successively. Then the mixture was stirred and refluxed at  $60^\circ\text{C}$  over night. After successive filtration and purification by column chromatography (PE:EA, 2:1), alcohol **SI-5** (2.19 g, 6.6 mmol, 66% yield) was given as colorless oil.

**Preparation of unactivated alkyl iodide 1a:** To a solution of **SI-5** (1.66 g, 5 mmol, 1.0 equiv) in 40 mL  $\text{DCM}$  was cooled to  $0^\circ\text{C}$ .  $\text{PPh}_3$  (3.93 g, 15 mmol, 3.0 equiv), imidazole (1.02 g, 15 mmol, 3.0 equiv),  $\text{I}_2$  (3.81 g, 15 mmol, 3.0 equiv) was added successively. Then the mixture was warmed to room temperature and stirred for 2 h. The precipitate was removed by

filtration. Purification by column chromatography (PE:EA, 10:1) afforded the iodide **1a** (1.94 g, 4.4 mmol, 88% yield) as a white solid.

**Analytical Data:**

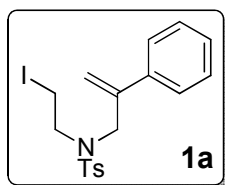

$C_{18}H_{20}INO_2S$

**MW:** 441.33 g·mol<sup>-1</sup>

White solid

**Yield:** 88%

**<sup>1</sup>H NMR (400 MHz, CDCl<sub>3</sub>, δ ppm):** 7.61 (d, *J* = 8.4 Hz, 2H), 7.40 (dd, *J* = 8.4, 2.0 Hz, 2H), 7.30-7.26 (m, 3H), 7.26-7.24 (m, 2H), 5.47 (s, 1H), 5.16 (s, 1H), 4.12 (s, 2H), 3.27 (t, *J* = 8.8 Hz, 2H), 2.92 (t, *J* = 8.8 Hz, 2H), 2.37 (s, 3H).

**<sup>13</sup>C NMR (100 MHz, CDCl<sub>3</sub>, δ ppm):** 143.7, 142.5, 137.4, 135.3, 129.8, 128.5, 128.2, 127.1, 126.2, 117.1, 52.9, 50.2, 21.4, 1.8.

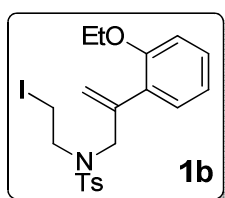

$C_{20}H_{24}INO_3S$

**MW:** 485.38 g·mol<sup>-1</sup>

Off-White solid

**Yield:** 79%

**<sup>1</sup>H NMR (400 MHz, CDCl<sub>3</sub>, δ ppm):** 7.58 (d, *J* = 8.0 Hz, 2H), 7.24 (d, *J* = 8.4 Hz, 2H), 7.07 (dd, *J* = 7.6, 1.6 Hz, 1H), 6.92-6.85 (m, 2H), 6.80 (d, *J* = 8.4 Hz, 1H), 5.34 (s, 1H), 5.23 (s, 1H), 4.22 (s, 2H), 4.00 (q, *J* = 6.8 Hz, 2H), 3.45 (t, *J* = 8.4 Hz, 2H), 3.19 (t, *J* = 8.4 Hz, 2H), 2.41 (s, 3H), 1.42 (t, *J* = 6.8 Hz, 3H).

**<sup>13</sup>C NMR (100 MHz, CDCl<sub>3</sub>, δ ppm):** 155.9, 143.5, 143.3, 136.2, 130.3, 129.6, 129.2, 127.4, 127.1, 120.5, 117.9, 111.3, 63.5, 52.7, 50.9, 21.4, 14.9, 2.0.

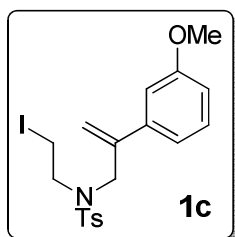

$C_{19}H_{22}INO_3S$

**MW:** 471.35 g·mol<sup>-1</sup>

Off-White solid

**Yield:** 71%

**<sup>1</sup>H NMR (400 MHz, CDCl<sub>3</sub>, δ ppm):** 7.70 (d, *J* = 8.4 Hz, 2H), 7.34 (d, *J* = 8.0 Hz, 2H), 7.30-7.28 (m, 1H), 7.09-7.07 (m, 2H), 6.91-6.88 (m, 1H), 5.58 (s, 1H), 5.26 (s, 1H), 4.20 (s, 2H), 3.86 (s, 3H), 3.37 (t, *J* = 8.8 Hz, 2H), 3.02 (t, *J* = 8.4 Hz, 2H), 2.46 (s, 3H).

**<sup>13</sup>C NMR (100 MHz, CDCl<sub>3</sub>, δ ppm):** 159.7, 143.8, 142.6, 138.9, 135.5, 129.9, 129.6, 127.3, 118.7, 117.3, 114.2, 111.8, 55.3, 53.2, 50.5, 21.5, 1.9.

---

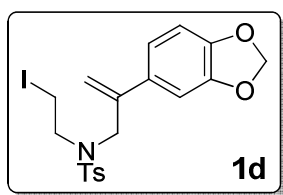

C<sub>19</sub>H<sub>20</sub>INO<sub>4</sub>S

**MW:** 485.34 g·mol<sup>-1</sup>

White solid

**Yield:** 55%

**<sup>1</sup>H NMR (400 MHz, CDCl<sub>3</sub>, δ ppm):** 7.59 (d, *J* = 8.4 Hz, 2H), 7.28 (d, *J* = 8.0 Hz, 2H), 6.80-6.74 (m, 3H), 6.53 (s, 1H), 5.98 (s, 2H), 5.97 (s, 1H), 4.41 (s, 2H), 3.31 (t, *J* = 8.4 Hz, 2H), 3.07 (t, *J* = 8.4 Hz, 2H), 2.44 (s, 3H).

**<sup>13</sup>C NMR (100 MHz, CDCl<sub>3</sub>, δ ppm):** 147.8, 147.7, 144.3, 143.9, 134.8, 133.8, 129.8, 127.4, 121.4, 119.9, 108.2, 106.5, 101.2, 53.5, 21.6, 17.2, 1.0.

---

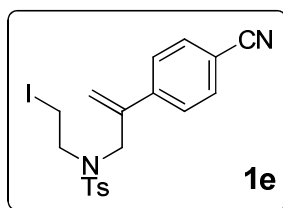

C<sub>19</sub>H<sub>19</sub>IN<sub>2</sub>O<sub>2</sub>S

**MW:** 466.34 g·mol<sup>-1</sup>

Off-White solid

**Yield:** 60%

**<sup>1</sup>H NMR (400 MHz, CDCl<sub>3</sub>, δ ppm):** 7.67 (d, *J* = 8.4 Hz, 2H), 7.63 (d, *J* = 8.8 Hz, 2H), 7.59 (d, *J* = 8.8 Hz, 2H), 7.33 (d, *J* = 8.0 Hz, 2H), 5.65 (s, 1H), 5.39 (s, 1H), 4.18 (s, 2H), 3.32 (t, *J* = 8.4 Hz, 2H), 2.94 (t, *J* = 8.4 Hz, 2H), 2.45 (s, 3H).

**<sup>13</sup>C NMR (100 MHz, CDCl<sub>3</sub>, δ ppm):** 144.1, 141.8, 141.4, 135.1, 132.3, 129.9, 127.2, 127.0, 120.1, 118.5, 111.9, 52.8, 50.5, 21.5, 1.1.

---

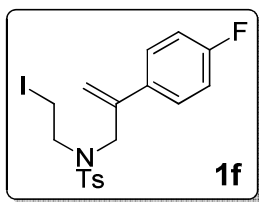

$C_{18}H_{19}FINO_2S$

**MW:** 459.32 g·mol<sup>-1</sup>

Off-White solid

**Yield:** 69%

**<sup>1</sup>H NMR (400 MHz, CDCl<sub>3</sub>, δ ppm):** 7.67 (d, *J* = 8.4 Hz, 2H), 7.46 (d, *J* = 8.8 Hz, 1H), 7.45 (d, *J* = 8.8 Hz, 1H), 7.33 (d, *J* = 8.0 Hz, 2H), 7.05 (d, *J* = 8.8 Hz, 1H), 7.03 (d, *J* = 8.8 Hz, 1H), 5.49 (s, 1H), 5.21 (s, 1H), 4.15 (s, 2H), 3.31 (t, *J* = 8.4 Hz, 2H), 2.96 (t, *J* = 8.4 Hz, 2H), 2.45 (s, 3H).

**<sup>13</sup>C NMR (100 MHz, CDCl<sub>3</sub>, δ ppm):** 164.0, 143.9, 141.7, 135.3, 133.4, 129.9, 128.1 (d, *J* = 8.0 Hz), 127.3, 117.2, 115.5 (d, *J* = 21.4 Hz), 53.3, 50.4, 21.6, 1.6.

**<sup>19</sup>F{<sup>1</sup>H} NMR (376 MHz, CDCl<sub>3</sub>, δ ppm):** -113.4.

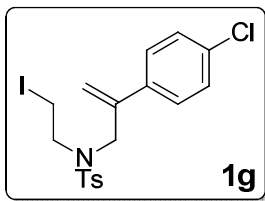

$C_{18}H_{19}ClINO_2S$

**MW:** 475.77 g·mol<sup>-1</sup>

Off-White solid

**Yield:** 89%

**<sup>1</sup>H NMR (400 MHz, CDCl<sub>3</sub>, δ ppm):** 7.66 (d, *J* = 8.4 Hz, 2H), 7.40 (d, *J* = 8.8 Hz, 2H), 7.32 (d, *J* = 8.4 Hz, 2H), 7.30 (d, *J* = 8.8 Hz, 2H), 5.53 (s, 1H), 5.24 (s, 1H), 4.15 (s, 2H), 3.32 (t, *J* = 8.4 Hz, 2H), 2.97 (t, *J* = 8.4 Hz, 2H), 2.45 (s, 3H).

**<sup>13</sup>C NMR (100 MHz, CDCl<sub>3</sub>, δ ppm):** 143.9, 141.6, 135.8, 135.3, 134.2, 129.9, 128.7, 127.7, 127.2, 117.7, 53.0, 50.1, 21.5, 1.5.

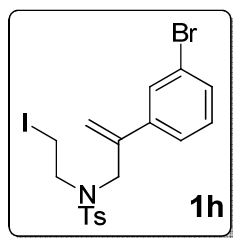

$C_{18}H_{19}BrINO_2S$

**MW:** 520.22 g·mol<sup>-1</sup>

Off-White solid

**Yield:** 80%



**<sup>1</sup>H NMR (400 MHz, CDCl<sub>3</sub>, δ ppm):** 7.66 (d, *J* = 8.4 Hz, 2H), 7.55 (t, *J* = 1.6 Hz, 2H), 7.44-7.38 (m, 2H), 7.31 (d, *J* = 8.0 Hz, 2H), 7.21 (t, *J* = 8.0 Hz, 1H), 5.53 (s, 1H), 5.28 (s, 1H), 4.15 (s, 2H), 3.36 (t, *J* = 8.4 Hz, 2H), 3.02 (t, *J* = 8.4 Hz, 2H), 2.44 (s, 3H).

**<sup>13</sup>C NMR (100 MHz, CDCl<sub>3</sub>, δ ppm):** 143.8, 141.4, 139.6, 135.3, 131.2, 130.0, 129.8, 129.2, 127.2, 125.0, 122.6, 118.2, 52.6, 50.3, 21.5, 1.4.

---

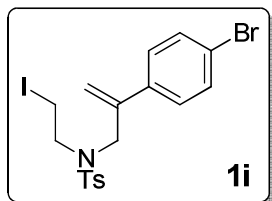

C<sub>18</sub>H<sub>19</sub>BrINO<sub>2</sub>S

MW: 520.22 g·mol<sup>-1</sup>

Off-White solid

Yield: 93%

**<sup>1</sup>H NMR (400 MHz, CDCl<sub>3</sub>, δ ppm):** 7.66 (d, *J* = 8.4 Hz, 2H), 7.46 (d, *J* = 8.4 Hz, 2H), 7.33 (d, *J* = 8.8 Hz, 2H), 7.32 (d, *J* = 8.0 Hz, 2H), 5.53 (s, 1H), 5.25 (s, 1H), 4.15 (s, 2H), 3.32 (t, *J* = 8.4 Hz, 2H), 2.97 (t, *J* = 8.4 Hz, 2H), 2.45 (s, 3H).

**<sup>13</sup>C NMR (100 MHz, CDCl<sub>3</sub>, δ ppm):** 143.9, 141.7, 136.2, 135.2, 131.6, 129.9, 128.0, 127.2, 122.4, 117.8, 52.9, 50.3, 21.5, 1.5.

---

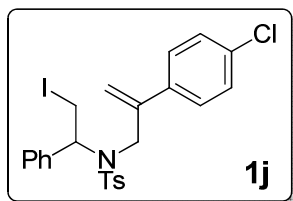

C<sub>24</sub>H<sub>23</sub>ClINO<sub>2</sub>S

MW: 551.87 g·mol<sup>-1</sup>

Off-White solid

Yield: 52%

**<sup>1</sup>H NMR (400 MHz, CDCl<sub>3</sub>, δ ppm):** 7.58 (d, *J* = 8.4 Hz, 2H), 7.31-7.27 (m, 2H), 7.26-7.20 (m, 5H), 7.14 (d, *J* = 8.8 Hz, 2H), 6.94 (d, *J* = 7.2 Hz, 2H), 5.34 (s, 1H), 5.19 (s, 1H), 5.04 (dd, *J* = 11.6, 4.0 Hz, 1H), 4.30 (d, *J* = 16.4 Hz, 1H), 3.80 (d, *J* = 16.4 Hz, 1H), 3.66 (t, *J* = 10.8 Hz, 1H), 3.40 (dd, *J* = 10.0, 4.0 Hz, 1H), 2.45 (s, 3H).

**<sup>13</sup>C NMR (100 MHz, CDCl<sub>3</sub>, δ ppm):** 143.7, 143.6, 136.9, 136.8, 134.0, 133.9, 129.7, 129.1, 128.6, 128.5, 128.4, 127.8, 127.3, 117.1, 62.7, 49.1, 21.6, 4.4.

---

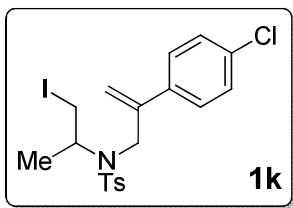

$C_{19}H_{21}ClINO_2S$

**MW:** 489.80 g·mol<sup>-1</sup>

Off-White solid

**Yield:** 70%

**<sup>1</sup>H NMR (400 MHz, CDCl<sub>3</sub>, δ ppm):** 7.68 (d, *J* = 8.4 Hz, 2H), 7.37-7.30 (m, 6H), 5.46 (s, 1H), 5.36 (s, 1H), 4.44 (d, *J* = 16.0 Hz, 1H), 4.06 (d, *J* = 16.0 Hz, 1H), 3.98 (dd, *J* = 14.4, 7.2 Hz, 1H), 3.04 (d, *J* = 7.6 Hz, 2H), 2.45 (s, 3H), 1.18 (d, *J* = 7.2 Hz, 3H).

**<sup>13</sup>C NMR (100 MHz, CDCl<sub>3</sub>, δ ppm):** 143.8, 143.7, 136.9, 136.5, 134.0, 129.8, 128.7, 127.9, 127.2, 117.0, 56.1, 48.4, 21.5, 16.5, 8.7.

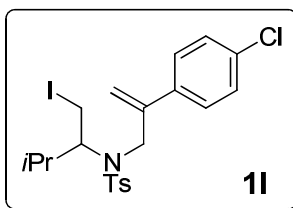

$C_{21}H_{25}ClINO_2S$

**MW:** 517.85 g·mol<sup>-1</sup>

Off-White solid

**Yield:** 68%

**<sup>1</sup>H NMR (400 MHz, CDCl<sub>3</sub>, δ ppm):** 7.73 (d, *J* = 8.4 Hz, 2H), 7.29 (d, *J* = 8.0 Hz, 2H), 7.26 (d, *J* = 3.6 Hz, 4H), 5.42 (s, 1H), 5.40 (s, 1H), 4.25 (s, 2H), 3.68-3.61 (m, 1H), 3.31 (dd, *J* = 10.8, 4.8 Hz, 1H), 3.13 (dd, *J* = 10.8, 6.4 Hz, 1H), 2.43 (s, 3H), 1.97-1.90 (m, 1H), 0.98 (d, *J* = 6.4 Hz, 3H), 0.67 (d, *J* = 6.4 Hz, 3H).

**<sup>13</sup>C NMR (100 MHz, CDCl<sub>3</sub>, δ ppm):** 143.6, 143.3, 137.4, 137.4, 133.8, 129.6, 128.5, 127.9, 127.9, 117.9, 65.9, 32.5, 21.6, 20.7, 20.5, 5.2.

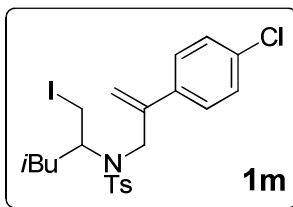

$C_{22}H_{27}ClINO_2S$

**MW:** 531.88 g·mol<sup>-1</sup>

Off-White solid

**Yield:** 68%

**<sup>1</sup>H NMR (400 MHz, CDCl<sub>3</sub>, δ ppm):** 7.69 (d, *J* = 8.0 Hz, 2H), 7.36-7.28 (d, *J* = 8.0 Hz, 6H), 5.46 (s, 1H), 5.39 (s, 1H), 4.30 (d, *J* = 16.0 Hz, 1H), 4.18 (d, *J* = 16.0 Hz, 1H), 3.90-3.83 (m, 1H), 3.04 (t, *J* = 9.2 Hz, 1H), 2.93 (dd, *J* = 9.6, 4.4 Hz, 1H), 2.44 (s, 3H), 1.56-1.43 (m, 2H), 1.33-1.27 (m, 1H), 0.73 (d, *J* = 6.4 Hz, 3H), 0.71 (d, *J* = 6.4 Hz, 3H).

**$^{13}\text{C}$  NMR (100 MHz,  $\text{CDCl}_3$ ,  $\delta$  ppm):** 143.8, 143.7, 137.1, 136.8, 134.0, 129.8, 128.6, 128.0, 127.4, 117.3, 58.9, 48.6, 40.1, 24.6, 22.8, 21.5, 21.4, 7.8.

---

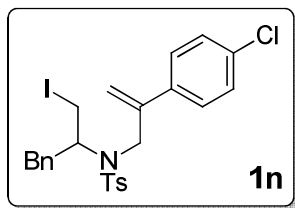

$\text{C}_{25}\text{H}_{25}\text{ClINO}_2\text{S}$

**MW:** 565.89  $\text{g}\cdot\text{mol}^{-1}$

Off-White solid

**Yield:** 47%

**$^1\text{H}$  NMR (400 MHz,  $\text{CDCl}_3$ ,  $\delta$  ppm):** 7.66 (d,  $J = 8.4$  Hz, 2H), 7.26-7.19 (m, 9H), 7.05-7.00 (m, 2H), 5.46 (s, 1H), 5.31 (s, 1H), 4.30 (d,  $J = 16.0$  Hz, 1H), 4.18 (d,  $J = 15.6$  Hz, 1H), 4.01-3.94 (m, 1H), 3.28-3.19 (m, 2H), 3.04 (dd,  $J = 14.0, 7.6$  Hz, 1H), 2.93 (dd,  $J = 14.0, 6.4$  Hz, 1H), 2.44 (s, 3H).

**$^{13}\text{C}$  NMR (100 MHz,  $\text{CDCl}_3$ ,  $\delta$  ppm):** 143.7, 143.4, 137.8, 137.0, 136.7, 134.0, 129.6, 129.0, 128.6, 128.6, 127.9, 127.7, 126.7, 118.1, 62.6, 50.2, 39.1, 21.6, 6.6.

---

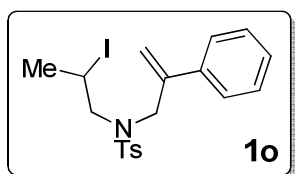

$\text{C}_{19}\text{H}_{22}\text{INO}_2\text{S}$

**MW:** 455.35  $\text{g}\cdot\text{mol}^{-1}$

Off-White solid

**Yield:** 52%

**$^1\text{H}$  NMR (400 MHz,  $\text{CDCl}_3$ ,  $\delta$  ppm):** 7.68 (d,  $J = 8.4$  Hz, 2H), 7.47 (dd,  $J = 8.4, 1.6$  Hz, 2H), 7.36-7.30 (m, 5H), 5.53 (s, 1H), 5.18 (s, 1H), 4.36 (d,  $J = 14.4$  Hz, 1H), 4.20-4.13 (m, 1H), 3.94 (d,  $J = 14.4$  Hz, 1H), 3.51 (dd,  $J = 14.4, 10.8$  Hz, 1H), 3.28 (dd,  $J = 14.4, 4.8$  Hz, 1H), 2.45 (s, 3H), 1.59 (d,  $J = 6.8$  Hz, 3H).

**$^{13}\text{C}$  NMR (100 MHz,  $\text{CDCl}_3$ ,  $\delta$  ppm):** 143.8, 142.7, 137.4, 135.1, 129.8, 128.6, 128.3, 127.5, 126.4, 117.1, 58.2, 54.4, 25.1, 24.4, 21.5.

---

#### IV. The General Synthetic Procedure and Analytical Data for 5-phenyl-1-tosyl-1,2,3,6-tetrahydropyridine

##### General Synthetic Procedure:

Unactivated alkyl iodide **1a** (88.2 mg, 0.2 mmol, 1.0 equiv) and PdCl<sub>2</sub>(dppf) (14.6 mg, 0.02 mmol, 0.1 equiv) were added to a reaction vessel and vacuum purged three times, backfilling with N<sub>2</sub>. Toluene (2 mL) and *N,N*-dicyclohexylmethylamine (85.8  $\mu$ L, 0.4 mmol, 2.0 equiv) was added successively and the reaction was heated at 110 °C for 16 h. The reaction was cooled to room temperature and quenched with a saturated aqueous solution of NH<sub>4</sub>Cl. The aqueous layer was extracted with EtOAc. The combined organic layers were concentrated in vacuo. Purification by column chromatography (PE:EA, 10:1) afforded the desired 5-phenyl-1-tosyl-1,2,3,6-tetrahydropyridine **2a** (51 mg, 0.016 mmol, 80% yield).

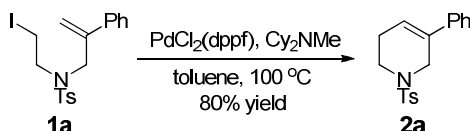

##### Analytical Data:

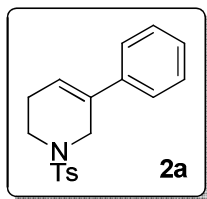

C<sub>18</sub>H<sub>19</sub>NO<sub>2</sub>S

MW: 313.41 g·mol<sup>-1</sup>

White solid

Isolated Amount: 50.3 mg

Yield: 80%

<sup>1</sup>H NMR (400 MHz, CDCl<sub>3</sub>,  $\delta$  ppm): 7.72 (d, *J* = 8.0 Hz, 2H), 7.33-7.27 (m, 7H), 6.08-6.06 (m, 1H), 3.96-3.91 (m, 2H), 3.24 (t, *J* = 5.6 Hz, 2H), 2.43 (s, 3H), 2.43-2.37 (m, 2H).

<sup>13</sup>C NMR (100 MHz, CDCl<sub>3</sub>,  $\delta$  ppm): 143.6, 138.7, 133.3, 129.7, 128.5, 127.7, 125.2, 122.1, 46.4, 42.3, 25.6, 21.5.

MS (EI) *m/z* 313 (M<sup>+</sup>); HRMS (ESI) Calcd for C<sub>18</sub>H<sub>19</sub>NO<sub>2</sub>S+H 314.1215, Found 314.1217.

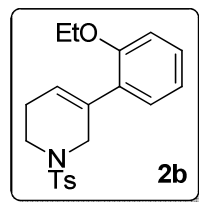

C<sub>20</sub>H<sub>23</sub>NO<sub>3</sub>S

MW: 357.47 g·mol<sup>-1</sup>

Off-white solid

Isolated Amount: 36.6 mg

Yield: 51%

**<sup>1</sup>H NMR (400 MHz, CDCl<sub>3</sub>, δ ppm):** 7.71 (d, *J* = 8.0 Hz, 2H), 7.30 (d, *J* = 8.0 Hz, 2H), 7.22 (td, *J* = 8.4, 2.0 Hz, 1H), 7.07 (dd, *J* = 7.2, 1.6 Hz, 1H), 6.90-6.82 (m, 2H), 5.77-5.74 (m, 1H), 4.02-3.98 (m, 4H), 3.26 (t, *J* = 5.6 Hz, 2H), 2.42 (s, 3H), 2.35-2.30 (m, 2H), 1.38-1.34 (t, *J* = 7.2 Hz, 3H).

**<sup>13</sup>C NMR (100 MHz, CDCl<sub>3</sub>, δ ppm):** 156.1, 143.3, 134.4, 133.9, 130.0, 129.5, 129.3, 128.9, 127.7, 123.5, 120.6, 111.6, 63.7, 47.2, 42.5, 25.4, 21.5, 14.7.

**MS (EI)** *m/z* 357 (M<sup>+</sup>); **HRMS (ESI)** Calcd for C<sub>20</sub>H<sub>23</sub>NO<sub>3</sub>S+H 358.1477, Found 358.1476.

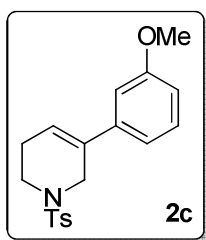

C<sub>19</sub>H<sub>21</sub>NO<sub>3</sub>S

**MW:** 343.44 g·mol<sup>-1</sup>

Off-white solid

**Isolated Amount:** 49.4 mg      **Yield:** 72%

**<sup>1</sup>H NMR (400 MHz, CDCl<sub>3</sub>, δ ppm):** 7.71 (d, *J* = 8.4 Hz, 2H), 7.32 (d, *J* = 8.0 Hz, 2H), 7.24-7.20 (m, 1H), 6.88-6.81 (m, 3H), 6.09-6.05 (m, 1H), 3.93-3.89 (m, 2H), 3.81 (s, 3H), 3.23 (t, *J* = 5.6 Hz, 2H), 2.43 (s, 3H), 2.40-2.36 (m, 2H).

**<sup>13</sup>C NMR (100 MHz, CDCl<sub>3</sub>, δ ppm):** 159.7, 143.6, 133.4, 129.7, 129.5, 127.7, 122.4, 117.7, 112.8, 111.3, 55.3, 46.4, 42.3, 25.6, 21.5.

**MS (EI)** *m/z* 343 (M<sup>+</sup>); **HRMS (ESI)** Calcd for C<sub>19</sub>H<sub>21</sub>NO<sub>3</sub>S+H 344.1320, Found 344.1322.

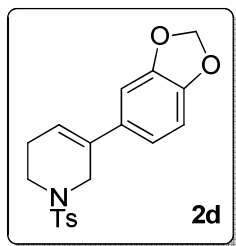

C<sub>19</sub>H<sub>19</sub>NO<sub>4</sub>S

**MW:** 357.42 g·mol<sup>-1</sup>

Off-white solid

**Isolated Amount:** 63.4 mg      **Yield:** 89%

**<sup>1</sup>H NMR (400 MHz, CDCl<sub>3</sub>, δ ppm):** 7.74 (d, *J* = 8.4 Hz, 2H), 7.30 (d, *J* = 8.0 Hz, 2H), 6.81-6.72 (m, 3H), 5.95 (s, 2H), 5.47-5.41 (m, 1H), 4.45-4.01 (m, 2H), 3.08-3.03 (m, 2H), 2.42 (s, 3H), 2.38-2.33 (m, 2H).

**<sup>13</sup>C NMR (100 MHz, CDCl<sub>3</sub>, δ ppm):** 147.6, 146.6, 143.5, 137.8, 137.5, 136.8, 129.7, 127.1, 122.0, 119.1, 107.9, 106.2, 101.0, 42.8, 28.9, 21.5, 16.3.

**MS (EI)** m/z 357 (M<sup>+</sup>); **HRMS (ESI)** Calcd for C<sub>19</sub>H<sub>19</sub>NO<sub>4</sub>S+H 358.1113, Found 358.1110.

---

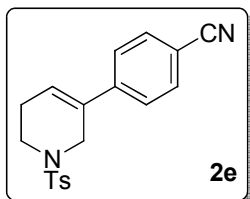

C<sub>19</sub>H<sub>18</sub>N<sub>2</sub>O<sub>2</sub>S

**MW:** 338.42 g·mol<sup>-1</sup>

Off-white solid

**Isolated Amount:** 53.2 mg      **Yield:** 79%

**<sup>1</sup>H NMR (400 MHz, CDCl<sub>3</sub>, δ ppm):** 7.71 (d, *J* = 8.0 Hz, 2H), 7.60 (d, *J* = 8.4 Hz, 2H), 7.37 (d, *J* = 8.4 Hz, 2H), 7.34 (d, *J* = 8.0 Hz, 2H), 6.26-6.20 (m, 1H), 3.92 (d, *J* = 2.0 Hz, 2H), 3.54 (t, *J* = 5.6 Hz, 1H), 3.29 (t, *J* = 6.0 Hz, 1H), 3.25-3.23 (m, 2H), 2.43 (s, 3H).

**<sup>13</sup>C NMR (100 MHz, CDCl<sub>3</sub>, δ ppm):** 143.8, 142.9, 136.8, 133.2, 132.4, 132.1, 129.8, 127.6, 125.6, 118.6, 111.2, 45.9, 42.1, 25.8, 21.5.

**MS (EI)** m/z 338 (M<sup>+</sup>); **HRMS (ESI)** Calcd for C<sub>19</sub>H<sub>18</sub>N<sub>2</sub>O<sub>2</sub>S+H 339.1167, Found 339.1169.

---

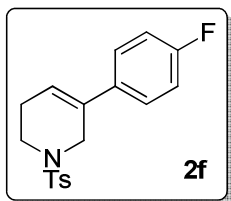

C<sub>18</sub>H<sub>18</sub>FNO<sub>2</sub>S

**MW:** 331.40 g·mol<sup>-1</sup>

Off-white solid

**Isolated Amount:** 49.2 mg      **Yield:** 74%

**<sup>1</sup>H NMR (400 MHz, CDCl<sub>3</sub>, δ ppm):** 7.71 (d, *J* = 8.4 Hz, 2H), 7.33 (d, *J* = 8.0 Hz, 2H), 7.25-7.22 (m, 2H), 7.02 (d, *J* = 8.8 Hz, 1H), 6.99 (d, *J* = 8.4 Hz, 1H), 6.02-6.00 (m, 1H), 3.89 (dd, *J* = 4.4, 2.4 Hz, 2H), 3.22 (t, *J* = 6.0 Hz, 2H), 2.43 (s, 3H), 2.41-2.36 (m, 2H).

**<sup>13</sup>C NMR (100 MHz, CDCl<sub>3</sub>, δ ppm):** 143.7, 134.8, 133.3, 132.5, 129.7, 127.7, 126.9 (d, *J* = 7.8 Hz), 122.2, 115.4 (d, *J* = 21.3 Hz), 46.5, 42.3, 25.6, 21.6.

**<sup>19</sup>F{<sup>1</sup>H} NMR (376 MHz, CDCl<sub>3</sub>, δ ppm):** -114.5.

**MS (EI)** m/z 331 (M<sup>+</sup>); **HRMS (ESI)** Calcd for C<sub>18</sub>H<sub>18</sub>FNO<sub>2</sub>S+H 332.1121, Found 332.1120.

---

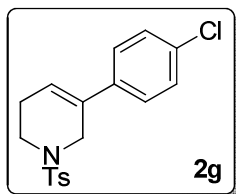

C<sub>18</sub>H<sub>18</sub>ClNO<sub>2</sub>S

**MW:** 347.86 g·mol<sup>-1</sup>

White solid

**Isolated Amount:** 47.2 mg      **Yield:** 68%

**<sup>1</sup>H NMR (400 MHz, CDCl<sub>3</sub>, δ ppm):** 7.71 (d, *J* = 5.6 Hz, 2H), 7.33 (d, *J* = 5.6 Hz, 2H), 7.28 (d, *J* = 5.6 Hz, 2H), 7.21 (d, *J* = 5.6 Hz, 2H), 6.07-6.06 (m, 1H), 3.90 (d, *J* = 1.2 Hz, 2H), 3.23 (t, *J* = 4.0 Hz, 2H), 2.43 (s, 3H), 2.40-2.36 (m, 2H).

**<sup>13</sup>C NMR (100 MHz, CDCl<sub>3</sub>, δ ppm):** 143.7, 137.1, 133.4, 133.2, 132.4, 129.7, 128.6, 127.6, 126.4, 122.8, 46.2, 42.2, 25.6, 21.5.

**MS (EI)** *m/z* 347 (M<sup>+</sup>); **HRMS (ESI)** Calcd for C<sub>18</sub>H<sub>18</sub>ClNO<sub>2</sub>S+H 348.0825, Found 348.0828.

---

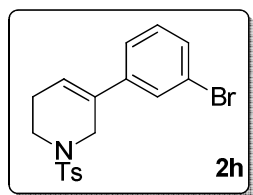

C<sub>18</sub>H<sub>18</sub>BrNO<sub>2</sub>S

**MW:** 392.31 g·mol<sup>-1</sup>

Off-white solid

**Isolated Amount:** 46.1 mg      **Yield:** 59%

**<sup>1</sup>H NMR (400 MHz, CDCl<sub>3</sub>, δ ppm):** 7.72 (d, *J* = 8.4 Hz, 2H), 7.33-7.29 (m, 6H), 6.10-6.04 (m, 1H), 3.96-3.92 (m, 2H), 3.24 (t, *J* = 6.0 Hz, 2H), 2.43 (s, 3H), 2.41-2.37 (m, 2H).

**<sup>13</sup>C NMR (100 MHz, CDCl<sub>3</sub>, δ ppm):** 143.6, 138.7, 133.5, 133.4, 129.7, 128.5, 127.7, 125.2, 122.2, 46.4, 42.4, 25.7, 21.5.

**MS (EI)** *m/z* 391 (M<sup>+</sup>); **HRMS (ESI)** Calcd for C<sub>18</sub>H<sub>18</sub>BrNO<sub>2</sub>S+H 392.0320, Found 392.0319.

---

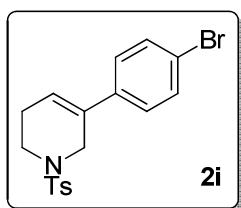

C<sub>18</sub>H<sub>18</sub>BrNO<sub>2</sub>S

**MW:** 392.31 g·mol<sup>-1</sup>

Off-white solid

**Isolated Amount:** 48.0 mg      **Yield:** 61%

**<sup>1</sup>H NMR (400 MHz, CDCl<sub>3</sub>, δ ppm):** 7.72 (d, *J* = 8.0 Hz, 2H), 7.33-7.29 (m, 6H), 6.09-6.06 (m, 1H), 3.94-3.93 (m, 2H), 3.23 (t, *J* = 6.0 Hz, 2H), 2.43 (s, 3H), 2.41-2.37 (m, 2H).

**<sup>13</sup>C NMR (100 MHz, CDCl<sub>3</sub>, δ ppm):** 143.6, 138.7, 133.4, 133.2, 129.7, 128.5, 127.7, 125.2, 122.2, 46.4, 42.3, 25.6, 21.5.

**MS (EI)** *m/z* 391 (M<sup>+</sup>); **HRMS (ESI)** Calcd for C<sub>18</sub>H<sub>18</sub>BrNO<sub>2</sub>S+H 392.0320, Found 392.0317.

---

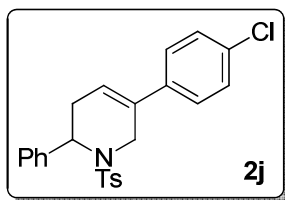

$C_{24}H_{22}ClNO_2S$

**MW:** 423.95  $g \cdot mol^{-1}$

Off-white solid

**Isolated Amount:** 68.6 mg      **Yield:** 81%

**$^1H$  NMR (400 MHz,  $CDCl_3$ ,  $\delta$  ppm):** 7.68 (d,  $J = 8.0$  Hz, 2H), 7.34-7.28 (m, 4H), 7.24-7.14 (m, 7H), 6.12-6.06 (m, 1H), 5.34 (d,  $J = 6.4$  Hz, 1H), 4.47 (d,  $J = 17.6$  Hz, 1H), 3.68-3.60 (m, 1H), 2.63-2.46 (m, 2H), 2.40 (s, 3H).

**$^{13}C$  NMR (100 MHz,  $CDCl_3$ ,  $\delta$  ppm):** 159.7, 143.6, 133.4, 129.7, 129.5, 127.7, 122.4, 117.7, 112.8, 111.3, 55.3, 42.3, 25.6, 21.5.

**MS (EI)**  $m/z$  423 ( $M^+$ ); **HRMS (ESI)** Calcd for  $C_{24}H_{22}ClNO_2S+H$  424.1138, Found 424.1141.

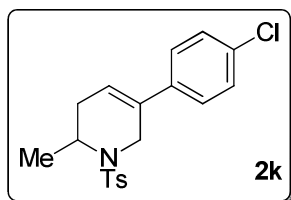

$C_{19}H_{20}ClNO_2S$

**MW:** 361.89  $g \cdot mol^{-1}$

Off-white solid

**Isolated Amount:** 56.5 mg      **Yield:** 78%

**$^1H$  NMR (400 MHz,  $CDCl_3$ ,  $\delta$  ppm):** 7.71 (d,  $J = 8.4$  Hz, 2H), 7.31-7.27 (m, 4H), 7.25-7.22 (m, 2H), 5.99-5.97 (m, 1H), 4.49 (d,  $J = 17.2$  Hz, 1H), 4.37-4.30 (m, 1H), 3.86-3.80 (m, 1H), 2.51-2.44 (m, 1H), 2.41 (s, 3H), 1.97-1.91 (m, 1H), 1.02 (d,  $J = 6.8$  Hz, 3H).

**$^{13}C$  NMR (100 MHz,  $CDCl_3$ ,  $\delta$  ppm):** 143.3, 137.1, 136.9, 133.4, 131.3, 129.7, 128.7, 127.1, 126.2, 121.1, 45.7, 41.2, 31.1, 21.5, 16.7.

**MS (EI)**  $m/z$  361 ( $M^+$ ); **HRMS (ESI)** Calcd for  $C_{19}H_{20}ClNO_2S+H$  362.0982, Found 362.0984.

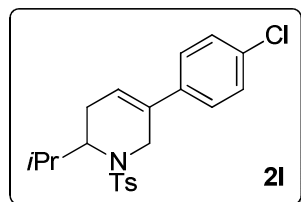

$C_{21}H_{24}ClNO_2S$

**MW:** 389.94  $g \cdot mol^{-1}$

Off-white solid

**Isolated Amount:** 50.5 mg      **Yield:** 65%



**<sup>1</sup>H NMR (400 MHz, CDCl<sub>3</sub>, δ ppm):** 7.66 (d, *J* = 8.4 Hz, 2H), 7.29 (d, *J* = 8.4 Hz, 2H), 7.22 (d, *J* = 8.0 Hz, 2H), 7.20 (d, *J* = 8.4 Hz, 2H), 5.91-5.86 (m, 1H), 4.58-4.50 (m, 1H), 3.95-3.86 (m, 1H), 3.65 (dd, *J* = 10.4, 6.4 Hz, 1H), 2.39 (s, 3H), 2.22-2.15 (m, 1H), 2.06-1.99 (m, 1H), 1.83-1.77 (m, 1H), 1.02 (d, *J* = 6.8 Hz, 3H), 0.93 (d, *J* = 6.8 Hz, 3H).

**<sup>13</sup>C NMR (100 MHz, CDCl<sub>3</sub>, δ ppm):** 143.0, 138.1, 136.8, 133.4, 131.6, 129.5, 128.7, 126.8, 126.0, 121.4, 56.5, 41.9, 28.2, 25.2, 21.5, 20.2, 20.1.

**MS (EI)** *m/z* 389 (M<sup>+</sup>); **HRMS (ESI)** Calcd for C<sub>21</sub>H<sub>24</sub>ClNO<sub>2</sub>S+H 390.1295, Found 390.1295.

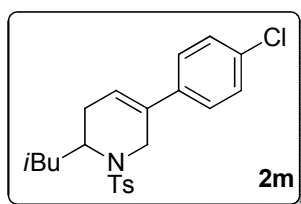

C<sub>22</sub>H<sub>26</sub>ClNO<sub>2</sub>S

**MW:** 403.97 g·mol<sup>-1</sup>

Off-white solid

**Isolated Amount:** 49.8 mg      **Yield:** 62%

**<sup>1</sup>H NMR (400 MHz, CDCl<sub>3</sub>, δ ppm):** 7.61 (d, *J* = 8.4 Hz, 2H), 7.22 (d, *J* = 8.8 Hz, 2H), 7.16 (d, *J* = 8.0 Hz, 2H), 7.13 (d, *J* = 8.8 Hz, 2H), 5.85-5.80 (m, 1H), 4.45 (d, *J* = 17.6 Hz, 1H), 3.79 (d, *J* = 17.2 Hz, 1H), 3.00-2.83 (m, 1H), 2.32 (s, 3H), 2.20-2.13 (m, 1H), 1.86-1.80 (m, 1H), 1.62-1.54 (m, 2H), 1.47-1.41 (m, 1H), 0.85 (d, *J* = 6.0 Hz, 3H), 0.84 (d, *J* = 6.4 Hz, 3H).

**<sup>13</sup>C NMR (100 MHz, CDCl<sub>3</sub>, δ ppm):** 143.1, 137.7, 137.0, 133.4, 131.4, 129.5, 128.7, 127.0, 126.1, 121.5, 48.1, 41.4, 40.5, 28.4, 24.7, 22.9, 22.2, 21.5.

**MS (EI)** *m/z* 403 (M<sup>+</sup>); **HRMS (ESI)** Calcd for C<sub>22</sub>H<sub>26</sub>ClNO<sub>2</sub>S+H 404.1451, Found 404.1453.

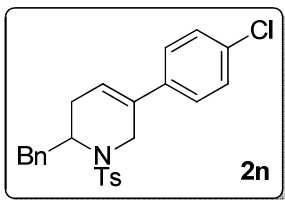

C<sub>25</sub>H<sub>24</sub>ClNO<sub>2</sub>S

**MW:** 437.98 g·mol<sup>-1</sup>

Off-white solid

**Isolated Amount:** 61.1 mg      **Yield:** 70%

**<sup>1</sup>H NMR (400 MHz, DMSO, δ ppm):** 7.65 (d, *J* = 8.0 Hz, 2H), 7.34-7.29 (m, 5H), 7.24-7.13 (m, 6H), 6.06-6.01 (m, 1H), 4.53 (d, *J* = 17.6 Hz, 1H), 4.44-4.38 (m, 1H), 3.99-3.94 (m, 1H), 2.76-2.65 (m, 2H), 2.39 (s, 3H), 2.29-2.23 (m, 1H), 2.07-2.01 (m, 1H).

**$^{13}\text{C}$  NMR (100 MHz, DMSO,  $\delta$  ppm):** 143.3, 138.0, 137.2, 136.8, 133.5, 131.7, 129.7, 129.2, 128.7, 128.6, 127.0, 126.6, 126.2, 121.1, 51.5, 41.8, 37.1, 27.1, 21.5.

**MS (EI)**  $m/z$  437 ( $\text{M}^+$ ); **HRMS (ESI)** Calcd for  $\text{C}_{25}\text{H}_{24}\text{ClNO}_2\text{S}+\text{H}$  438.1295, Found 438.1292.

---

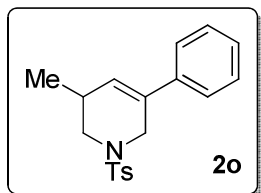

$\text{C}_{19}\text{H}_{21}\text{NO}_2\text{S}$

**MW:** 327.44  $\text{g}\cdot\text{mol}^{-1}$

White solid

**Isolated Amount:** 37.9 mg      **Yield:** 58%

**$^1\text{H}$  NMR (400 MHz,  $\text{CDCl}_3$ ,  $\delta$  ppm):** 7.72 (d,  $J = 5.2$  Hz, 2H), 7.34-7.28 (m, 7H), 5.96-5.92 (m, 1H), 4.08 (d,  $J = 10.4$  Hz, 1H), 3.71 (d,  $J = 10.8$  Hz, 1H), 3.52 (dd,  $J = 7.2, 2.8$  Hz, 1H), 2.66-2.59 (m, 1H), 2.59-2.54 (m, 1H), 2.43 (s, 3H), 1.09 (d,  $J = 4.4$  Hz, 3H).

**$^{13}\text{C}$  NMR (100 MHz,  $\text{CDCl}_3$ ,  $\delta$  ppm):** 143.6, 140.9, 138.5, 132.6, 129.7, 128.6, 128.5, 127.7, 127.7, 125.3, 49.1, 46.3, 30.6, 21.5, 18.4.

**MS (EI)**  $m/z$  327 ( $\text{M}^+$ ); **HRMS (ESI)** Calcd for  $\text{C}_{19}\text{H}_{21}\text{NO}_2\text{S}+\text{H}$  328.1371, Found 328.1369.

---

## V. The Synthetic Procedure and Analytical Data for Deuterium- Substrate.

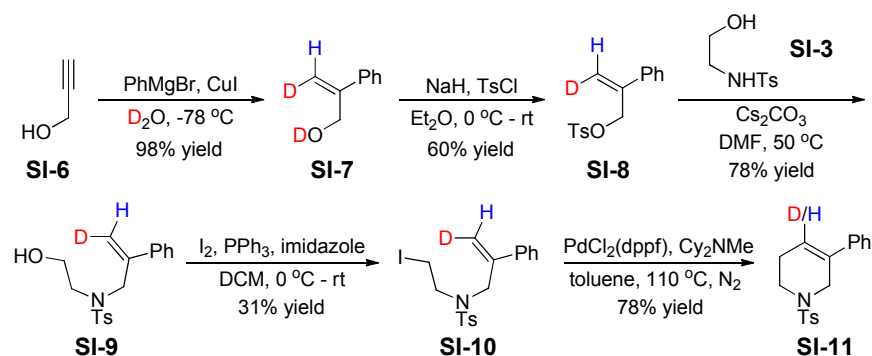

### General Procedure:

**Preparation of SI-7:** To a solution of propargyl alcohol **SI-6** (1.0 g, 18 mmol, 1.0 equiv) in dry THF (40 mL) was vacuum purged three times, backfilling with  $\text{N}_2$ .  $\text{CuI}$  (0.343 g, 1.8 mmol, 0.1 equiv) was added under stirring and  $\text{N}_2$  atmosphere. The suspension was cooled to  $-78^\circ\text{C}$ . Then a solution of  $\text{PhMgBr}$  (8.2 g, 45 mmol, 2.5 equiv) in 60 mL THF was added dropwise by constant pressure funnel under vigorous stirring. The resulting mixture held at  $-78^\circ\text{C}$  for 1 h. Then it was warmed to room temperature and stirred for 18 h. The mixture was cooled to  $-78^\circ\text{C}$  again and quenched slowly with  $\text{D}_2\text{O}$  (3.6 g, 180 mmol, 10.0 equiv). After the suspension was warmed to room temperature, dilute  $\text{HCl}$  solution (1 N, 150 mL) was added and the aqueous layer was extracted with  $\text{EtOAc}$  (50 mL x 3). The combined organic layers were washed brine (30 mL), dried with  $\text{Na}_2\text{SO}_4$ , and concentrated in vacuo. Purification by column chromatography (PE:EA, 5:1) afforded the **SI-7** as a yellow liquid (2.4 g, 17.6 mmol, 98% yield).  $^1\text{H}$  NMR (400 MHz,  $\text{CDCl}_3$ ,  $\delta$  ppm): 7.46 (d,  $J = 8.4$  Hz, 2H), 7.39-7.30 (m, 3H), 5.46 (s, 1H), 5.34 (s, 0.10H), 4.54 (s, 2H).

**Preparation of SI-8:** To a suspension of  $\text{NaH}$  (Purity is 60%) (0.178 g, 4.4 mmol, 1.5 equiv) in 10 mL  $\text{Et}_2\text{O}$  was added **SI-7** (0.406 g, 3.0 mmol, 1.0 equiv) under  $\text{N}_2$  atmosphere. The mixture was stirred for 30 min at room temperature and then cooled to  $0^\circ\text{C}$ . A solution of  $\text{TsCl}$  (0.564 g, 3.0 mmol, 1.0 equiv) in 10 mL  $\text{Et}_2\text{O}$  was added dropwise. The resulting mixture was warmed to room temperature and stirred for 1 h. Then the solution was quenched with a saturated aqueous solution of  $\text{NH}_4\text{Cl}$  (30 mL). The aqueous layer was extracted with  $\text{Et}_2\text{O}$  (10 mL x 3). The combined organic layers were washed with brine (25 mL), dried with  $\text{Na}_2\text{SO}_4$ , and concentrated in vacuo to afford the crude product **SI-8** as a yellow solid (0.521 g, 1.8 mmol, 60% yield), which was used without further purification.  $^1\text{H}$  NMR (400 MHz,

**CDCl<sub>3</sub>,  $\delta$  ppm):** 7.76 (d,  $J$  = 8.4 Hz, 2H), 7.36-7.27 (m, 7H), 5.52 (s, 1H), 5.35 (s, 0.10H), 4.92 (s, 2H), 2.45 (s, 3H).

**Preparation of SI-9:** To a solution of **SI-8** (0.490 g, 1.7 mmol, 1.0 equiv) in 10 mL DMF was added **SI-3** (0.732 g, 3.4 mmol, 2.0 equiv) and Cs<sub>2</sub>CO<sub>3</sub> (1.662 g, 5.1 mmol, 3.0 equiv). The mixture was heated to 50 °C and stirred for 5 h. The reaction was quenched with a saturated aqueous solution of NH<sub>4</sub>Cl (30 mL), the aqueous layer was extracted with EtOAc (20 mL). The combined organic layers were washed with brine (30 mL x 3), dried with Na<sub>2</sub>SO<sub>4</sub>, and evaporated. The crude product was purified by column chromatography (PE:EA, 2:1) to give the **SI-9** (0.443g, 1.3 mmol, 78% yield) as a yellow solid. **<sup>1</sup>H NMR (400 MHz, CDCl<sub>3</sub>,  $\delta$  ppm):** 7.67 (d,  $J$  = 8.0 Hz, 2H), 7.47 (dd,  $J$  = 8.0, 1.6 Hz, 2H), 7.35-7.30 (m, 5H), 5.49 (s, 1H), 5.23 (s, 0.10H), 4.24 (s, 2H), 3.60-3.52 (m, 2H), 3.16 (t,  $J$  = 5.2 Hz, 2H), 2.44 (s, 3H).

**Preparation of SI-10:** To a solution of **SI-9** (0.443 g, 1.3 mmol, 1.0 equiv) in 10 mL DCM was cooled to 0 °C. PPh<sub>3</sub> (1.047 g, 4.0 mmol, 3.0 equiv), imidazole (0.272 g, 4.0 mmol, 3.0 equiv), I<sub>2</sub> (1.013 g, 4.0 mmol, 3.0 equiv) was added successively. Then the mixture was warmed to room temperature and stirred for 2 h. The precipitate was removed by filtration. Purification by column chromatography (PE:EA, 10:1) afforded the iodide **SI-10** (0.182 g, 0.4 mmol, 31% yield) as a light yellow solid. **<sup>1</sup>H NMR (400 MHz, CDCl<sub>3</sub>,  $\delta$  ppm):** 7.67 (d,  $J$  = 8.4 Hz, 2H), 7.46 (dd,  $J$  = 8.0, 2.0 Hz, 2H), 7.35-7.31 (m, 5H), 5.52 (s, 1H), 5.23 (s, 0.10H), 4.18 (s, 2H), 3.33 (t,  $J$  = 8.4 Hz, 2H), 2.97 (t,  $J$  = 8.4 Hz, 2H), 2.45 (s, 3H).

**Preparation of SI-11:** **SI-10** (55.1 mg, 0.12 mmol, 1.0 equiv) and PdCl<sub>2</sub>(dppf) (8.8 mg, 0.012 mmol, 0.1 equiv) were added to a reaction vessel and vacuum purged three times, backfilling with N<sub>2</sub>. Toluene (2 mL) and *N,N*-dicyclohexylmethylamine (51.4  $\mu$ L, 0.24 mmol, 2.0 equiv) was added successively and the reaction was heated at 110 °C for 16 h. The reaction was cooled to room temperature and quenched with a saturated aqueous solution of NH<sub>4</sub>Cl. The aqueous layer was extracted with EtOAc. The combined organic layers were concentrated in vacuo. Purification by column chromatography (PE:EA, 10:1) afforded the desired **SI-11** (29.4 mg, 0.09 mmol, 78% yield). **<sup>1</sup>H NMR (400 MHz, CDCl<sub>3</sub>,  $\delta$  ppm):** 7.72 (d,  $J$  = 8.4 Hz, 2H), 7.34-7.27 (m, 7H), 6.09-6.06 (m, 0.44H), 3.96-3.91 (m, 2H), 3.24 (t,  $J$  = 6.0 Hz, 2H), 2.43 (s, 3H), 2.40-2.36 (m, 2H).

## VI. The Optimization, Synthetic Procedure and Analytical Data for TEMPO Adduct.

**Table S1.** Optimization of the TEMPO Testing Experiment<sup>a</sup>

| Entry | Catalyst                                       | Recovered <b>1a</b> <sup>b</sup>    | <b>2a</b> <sup>b</sup> | <b>3a</b> <sup>b</sup> |
|-------|------------------------------------------------|-------------------------------------|------------------------|------------------------|
| 1     | PdCl <sub>2</sub> (dppf) (10 mol %)            | 79% <sup>c</sup> (75%) <sup>d</sup> | trace                  | trace                  |
| 2     | PdCl <sub>2</sub> (dppf) (100 mol %)           | 70%                                 | trace                  | trace                  |
| 3     | Pd(PPh <sub>3</sub> ) <sub>4</sub> (10 mol %)  | 72%                                 | trace                  | 9%                     |
| 4     | Pd(PPh <sub>3</sub> ) <sub>4</sub> (50 mol %)  | 35%                                 | trace                  | 16%                    |
| 5     | Pd(PPh <sub>3</sub> ) <sub>4</sub> (100 mol %) | none                                | 12%                    | 31%                    |

<sup>a</sup>Reaction Conditions: **1a** (0.2 mmol), toluene (2.0 mL), 130 °C, N<sub>2</sub>, 16 h. <sup>b</sup>Isolated yields. <sup>c</sup>Without base. <sup>d</sup>With 2.0 equiv Cy<sub>2</sub>NMe.

### Synthetic Procedure and Analytical Data:

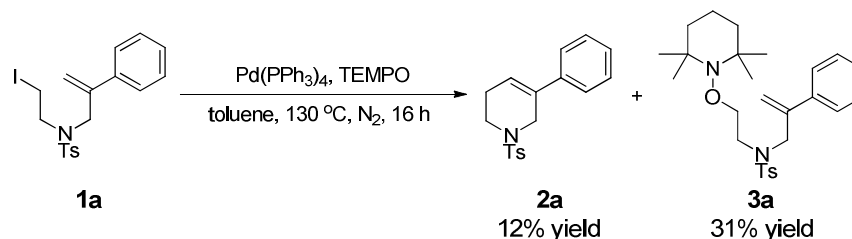

**1a** (44.1 mg, 0.1 mmol, 1.0 equiv), Pd(PPh<sub>3</sub>)<sub>4</sub> (115.6 mg, 0.1 mmol, 1.0 equiv) and TEMPO (31.3 mg, 0.2 mmol, 2.0 equiv) were added to a reaction vessel and vacuum purged three times, backfilling with N<sub>2</sub>. Toluene (2 mL) was added and the reaction was heated at 130 °C for 16 h. The reaction was cooled to room temperature and quenched with a saturated aqueous solution of NH<sub>4</sub>Cl. The aqueous layer was extracted with EtOAc. The combined organic layers were concentrated in vacuo. Purification by column chromatography (PE:EA, 10:1) afforded the desired **2a** (3.7 mg, 0.012 mmol, 12% yield) and **3a** (14.6 mg, 0.031 mmol, 31% yield) respectively. Analytical data for **3a**: <sup>1</sup>H NMR (400 MHz, CDCl<sub>3</sub>, δ ppm): 7.65 (d, *J* = 8.4 Hz, 2H), 7.46 (dd, *J* = 8.0, 2.0 Hz, 2H), 7.35-7.31 (m, 5H), 5.46 (s, 1H), 5.28 (s, 1H), 4.37 (s, 2H), 3.72 (t, *J* = 6.4 Hz, 2H), 3.29 (t, *J* = 6.4 Hz, 2H), 2.41 (s, 3H), 1.52-1.46 (m, 2H), 1.43-1.38 (m, 4H), 0.99 (s, 12H). <sup>13</sup>C NMR (100 MHz, CDCl<sub>3</sub>, δ ppm): 142.9, 138.6, 137.2, 135.1, 129.6, 128.3, 127.9, 127.2, 126.5, 116.2, 75.1, 59.6, 52.3, 45.2, 39.5, 32.8, 21.5, 21.4, 17.0.

## VII. Copies of the $^1\text{H}$ NMR, $^{13}\text{C}$ NMR, $^{19}\text{F}$ NMR

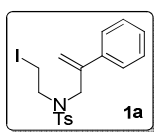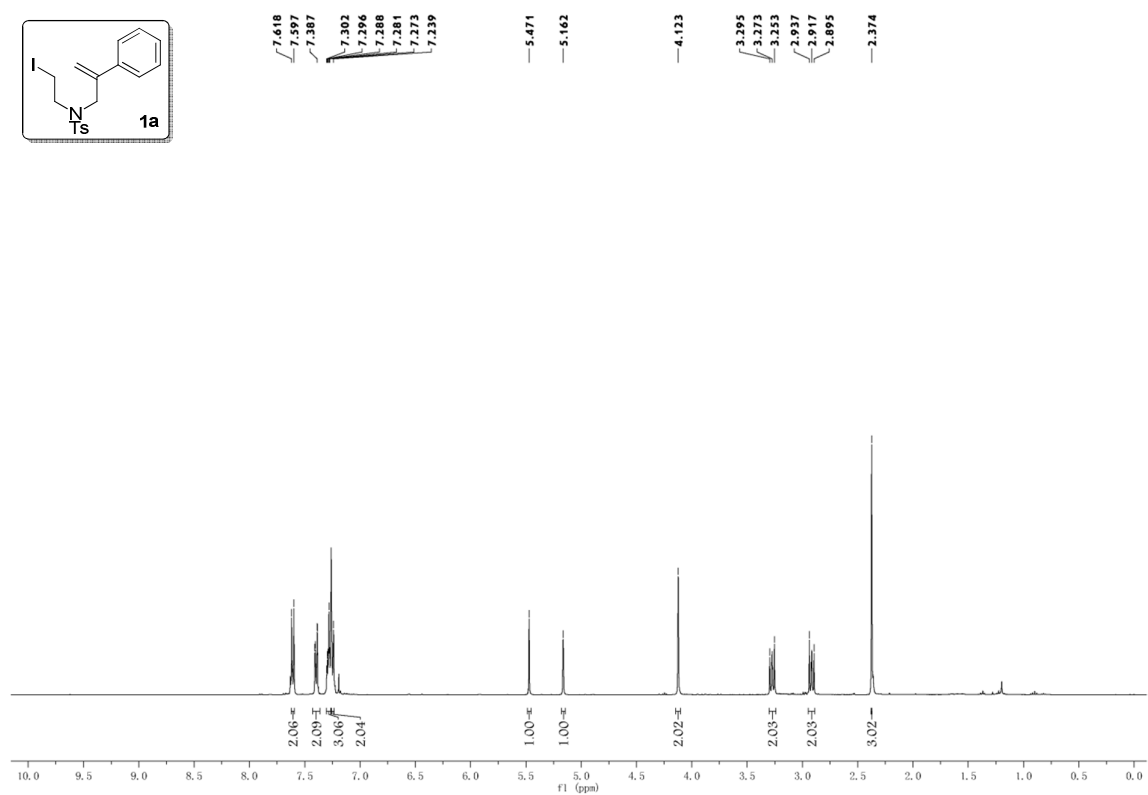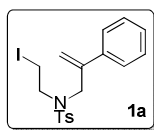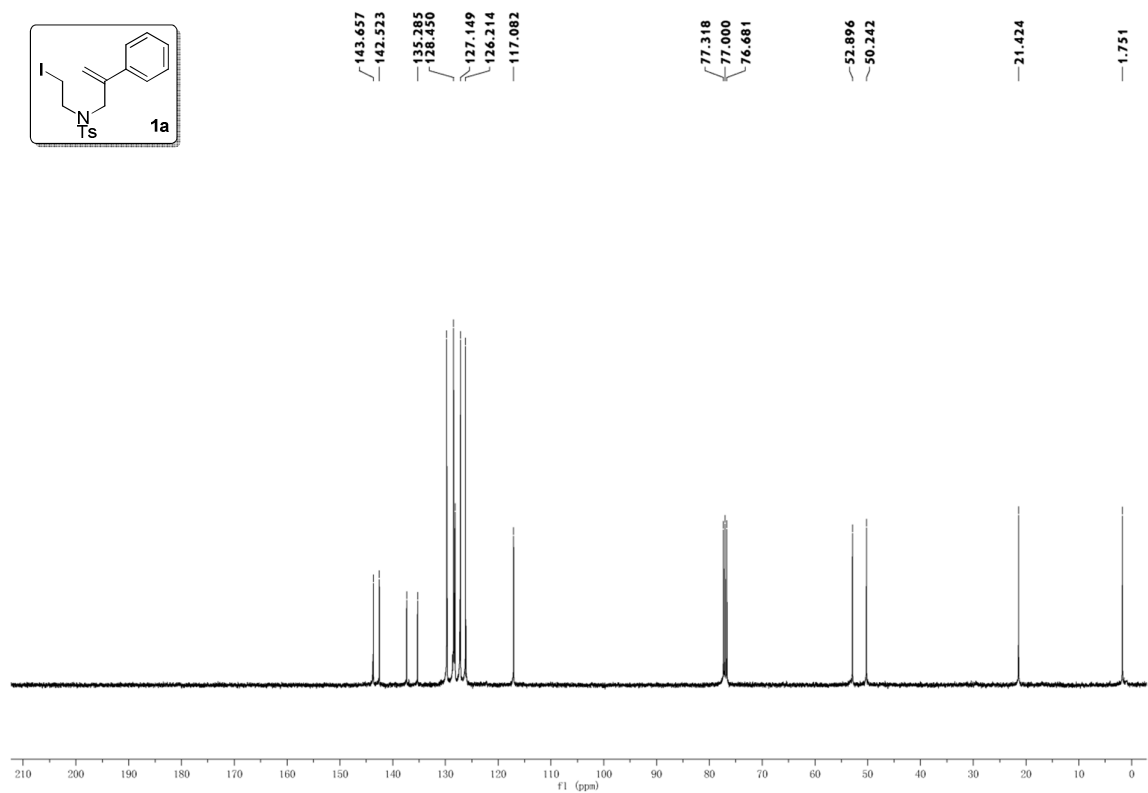

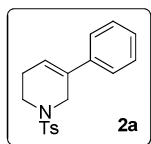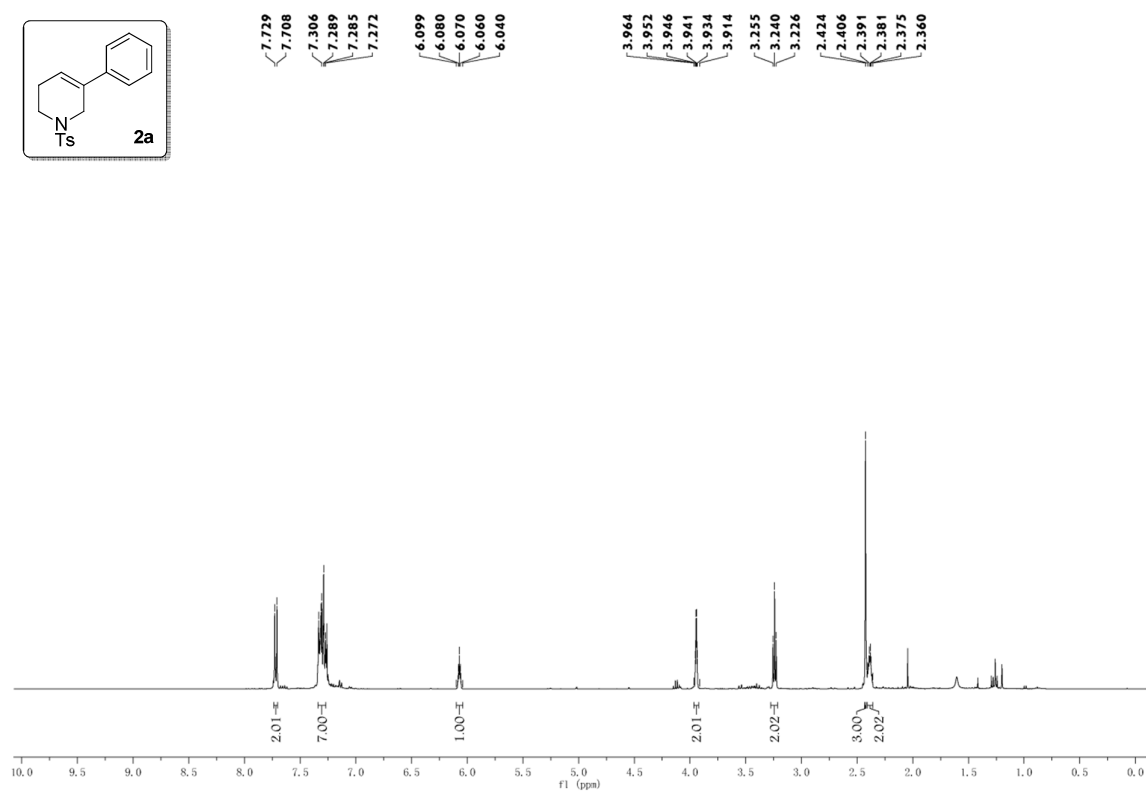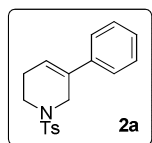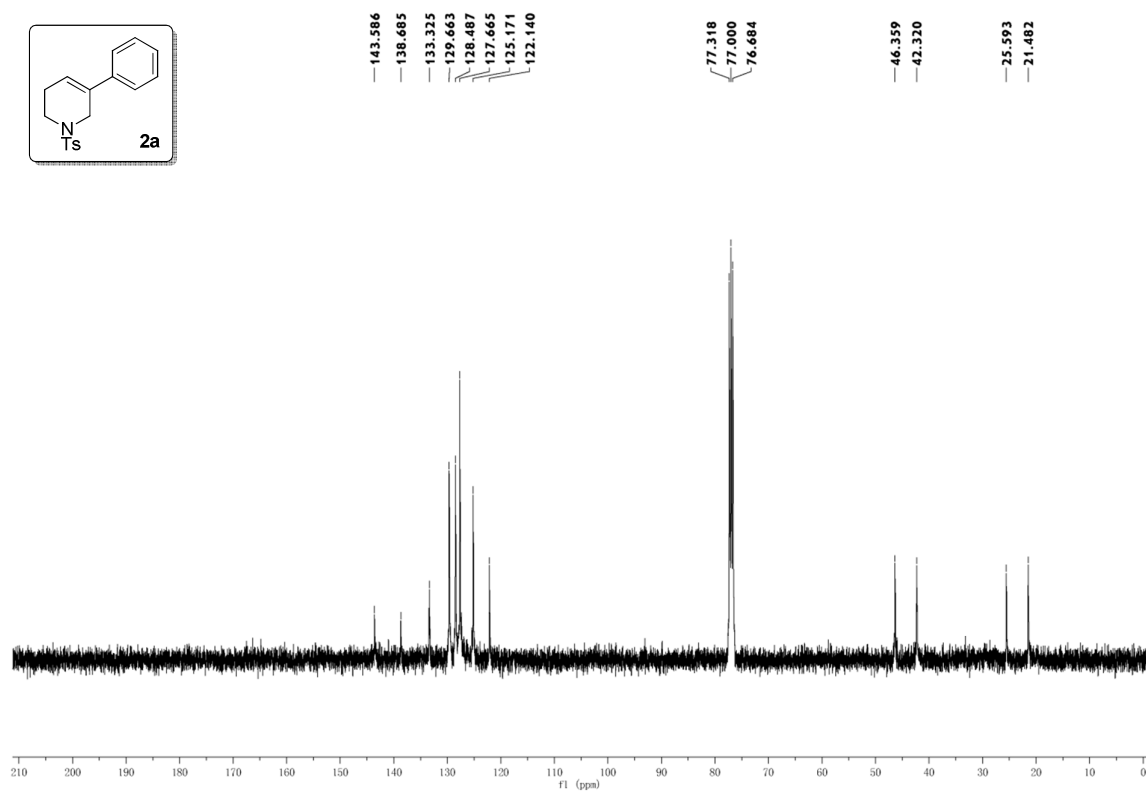

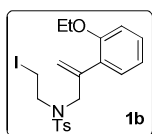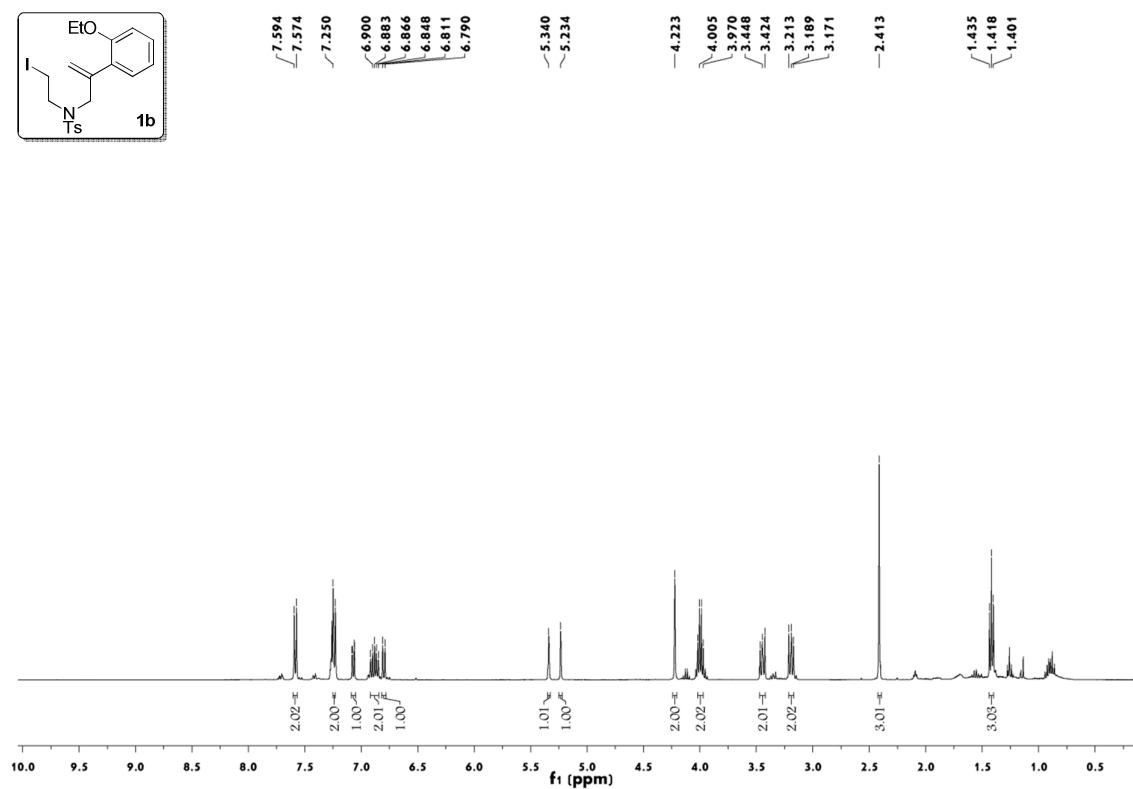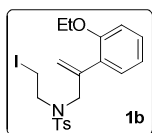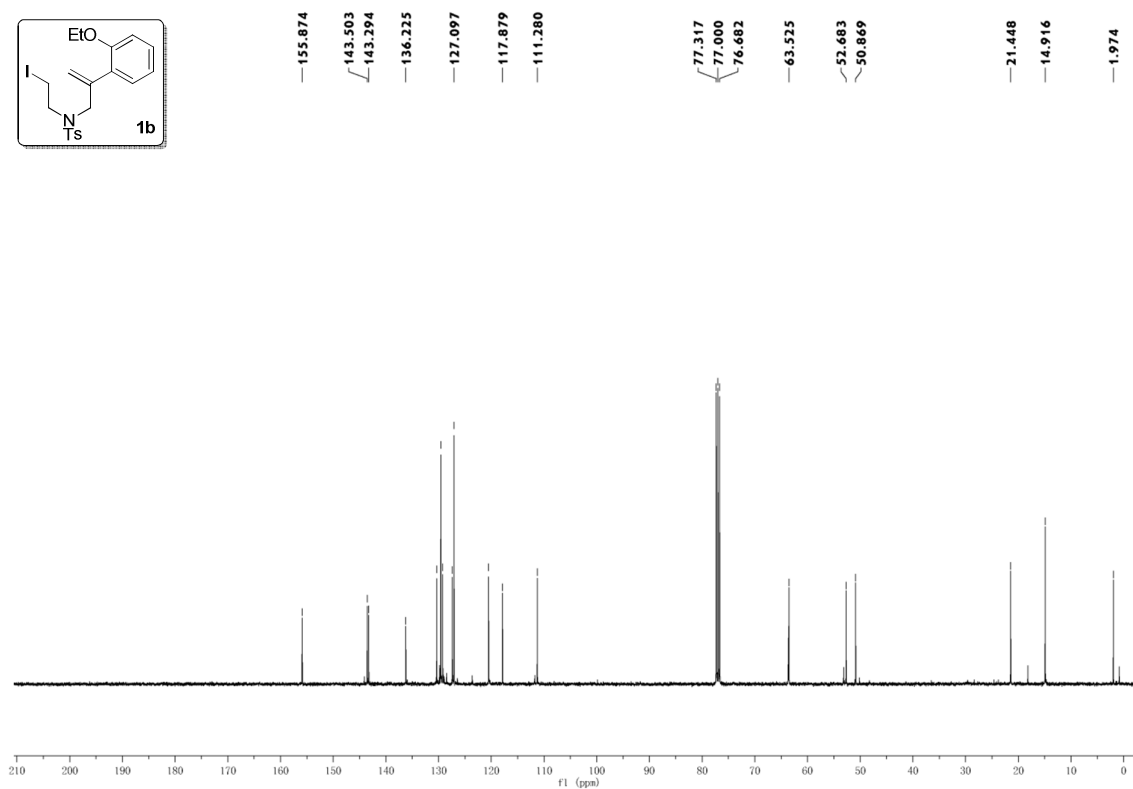



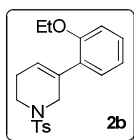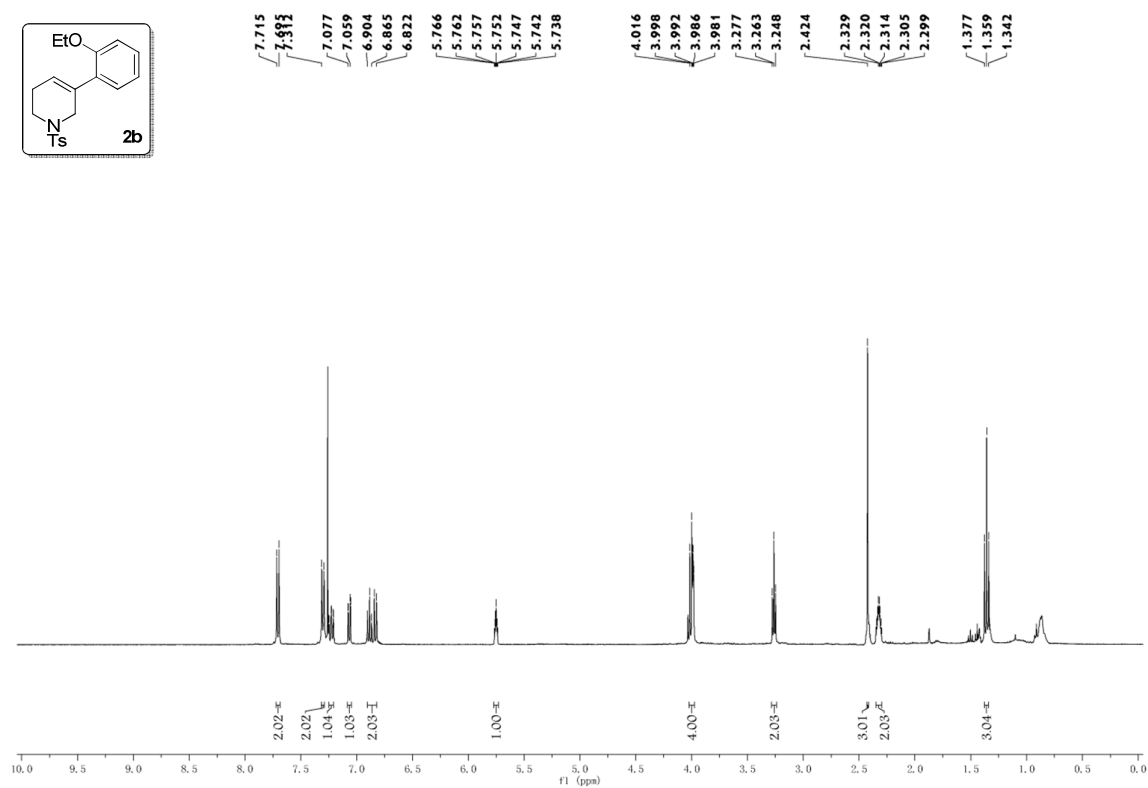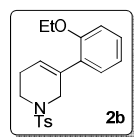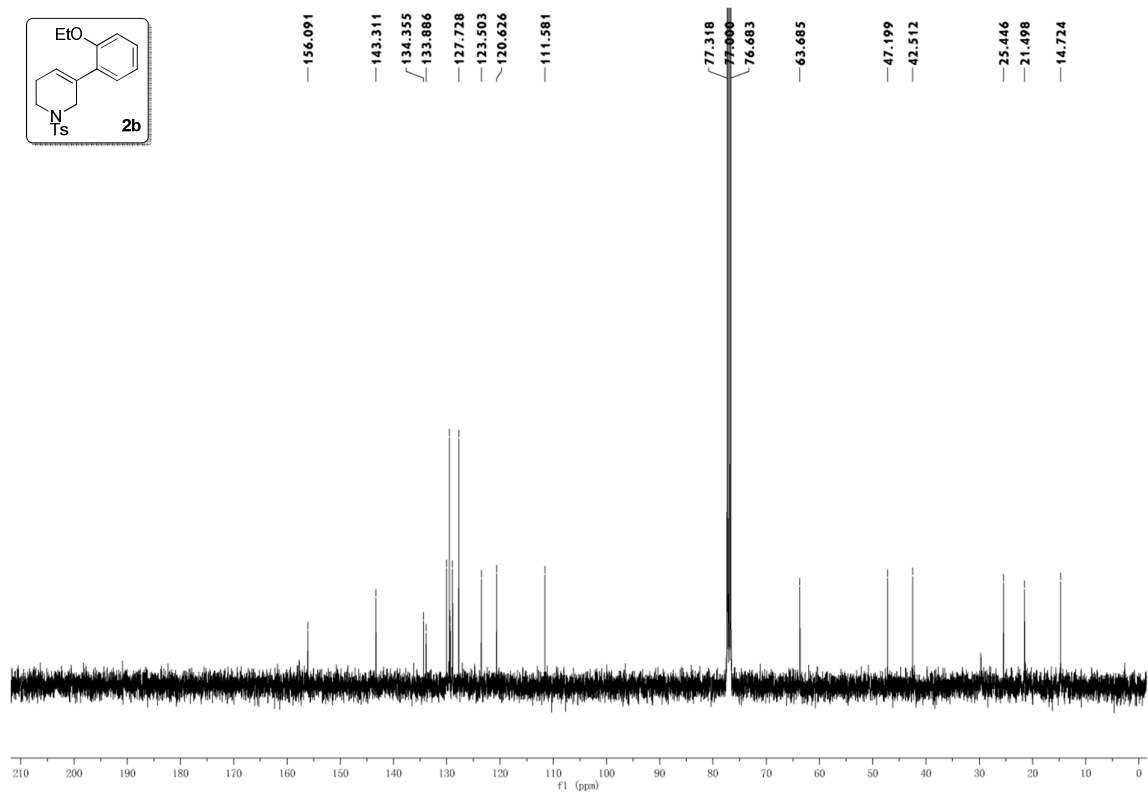

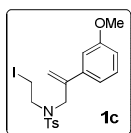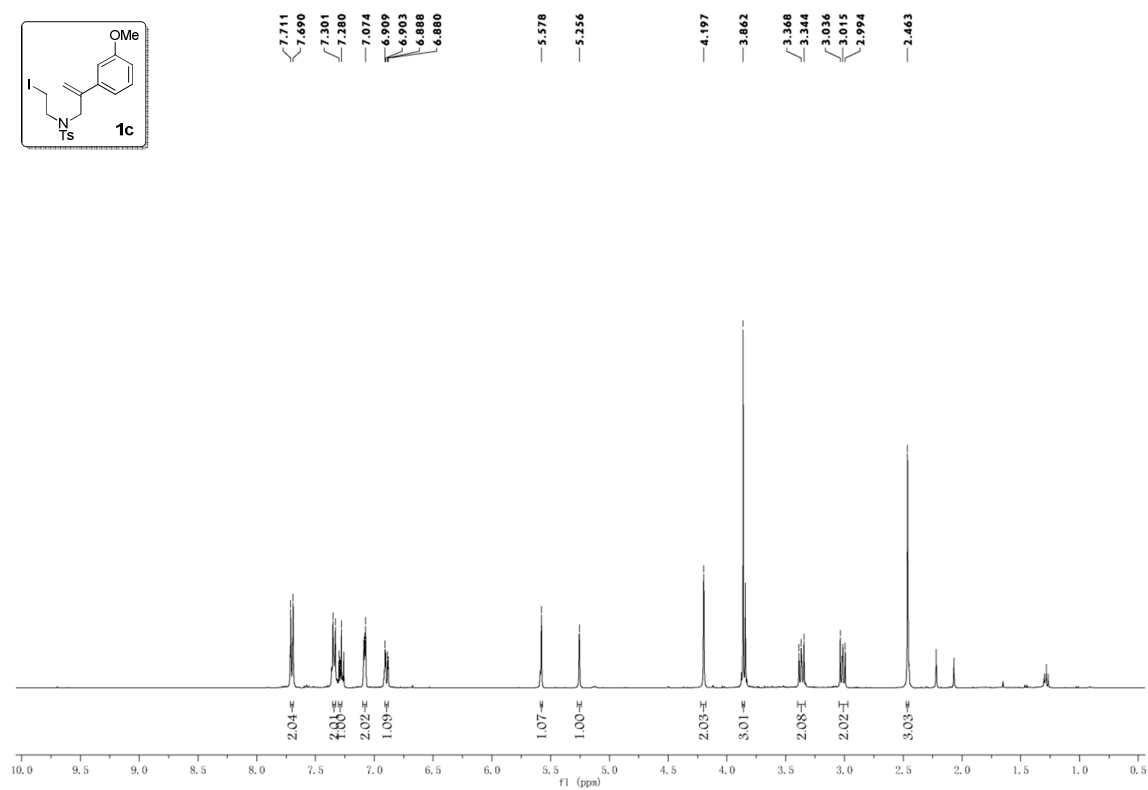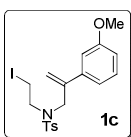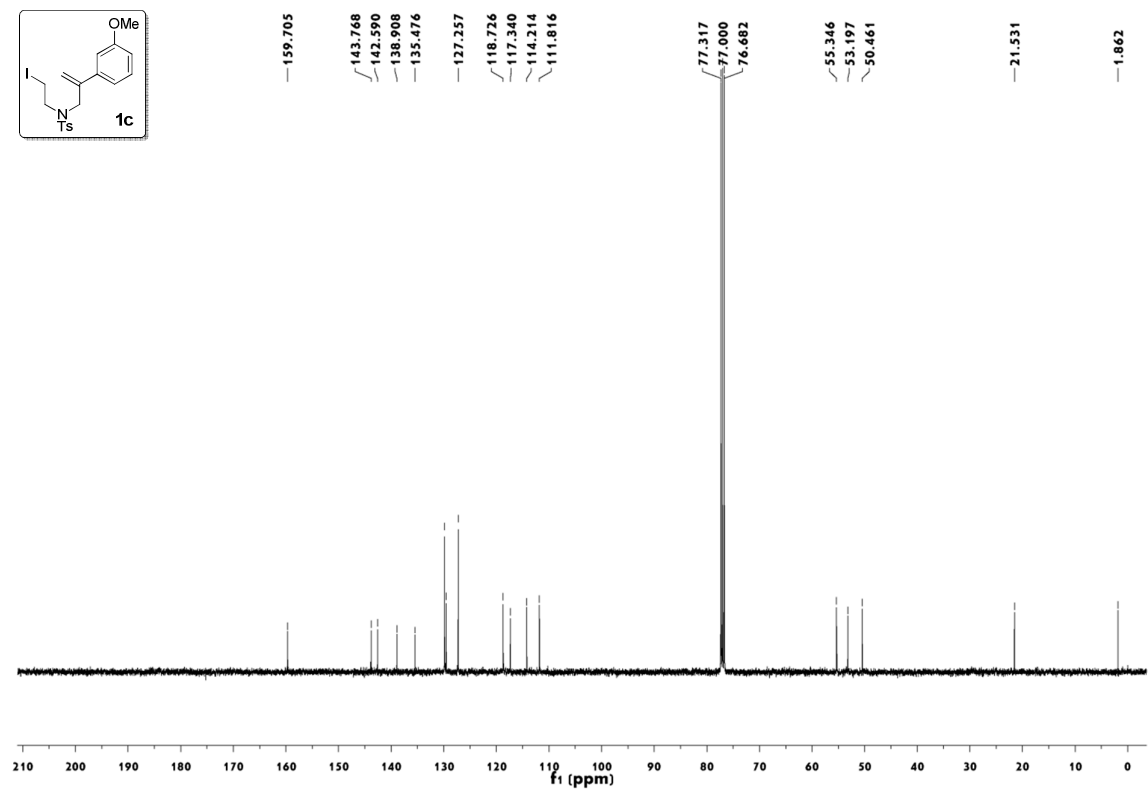

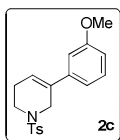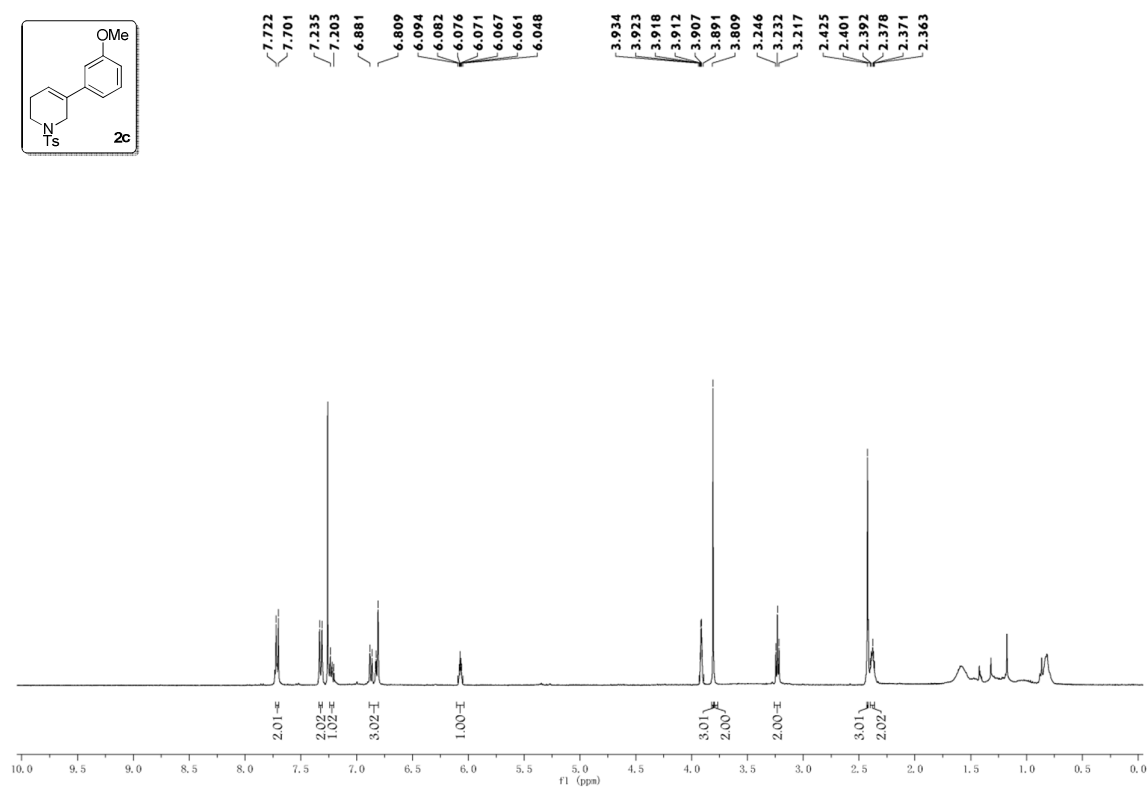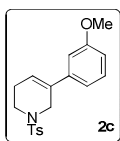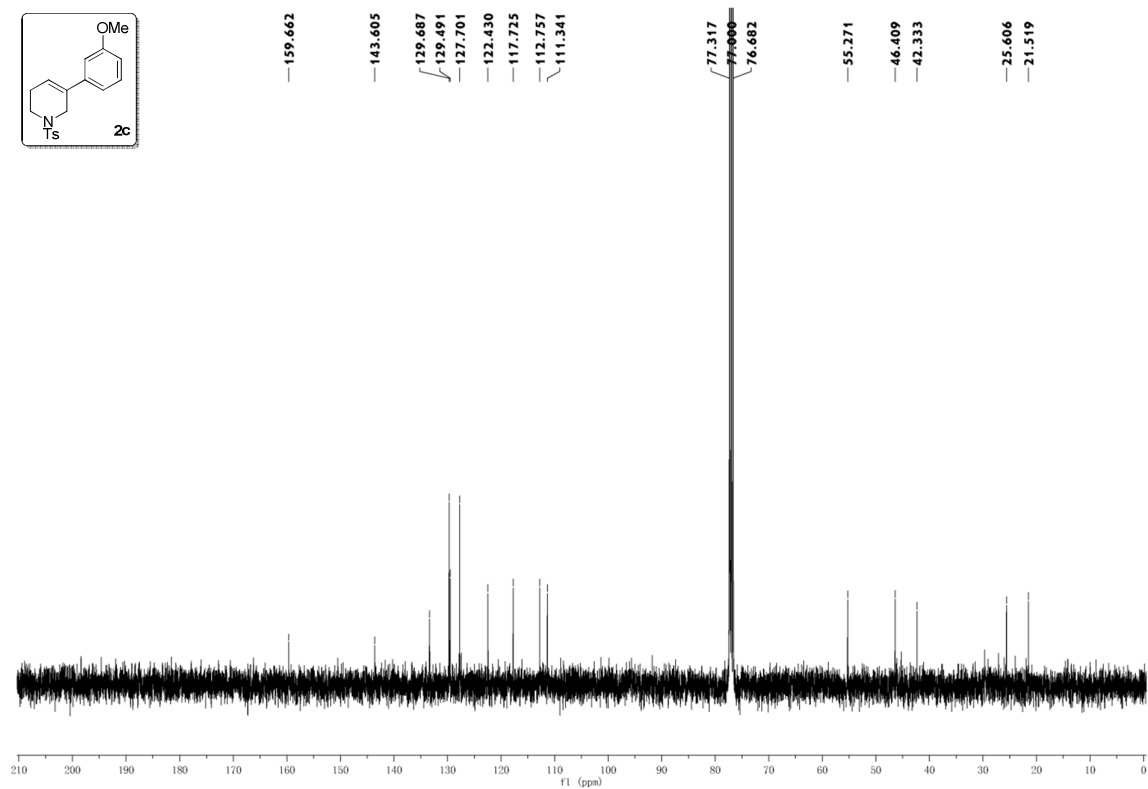

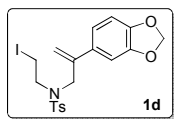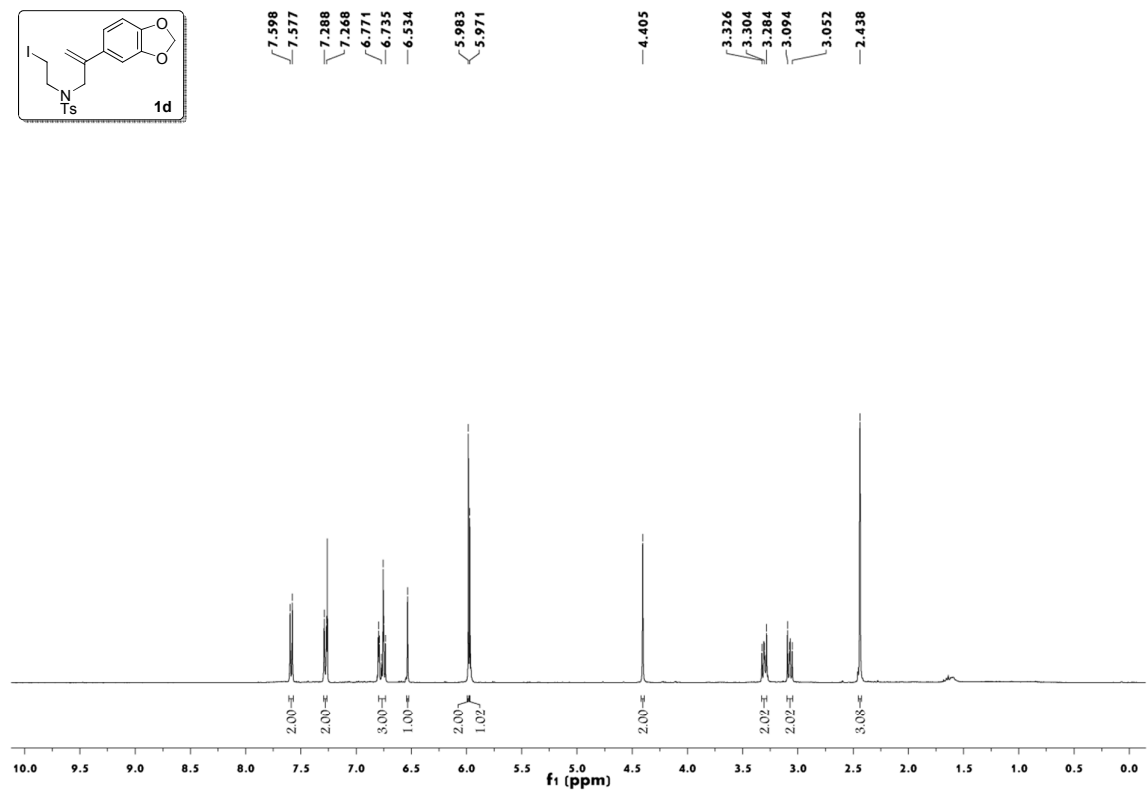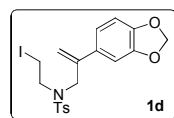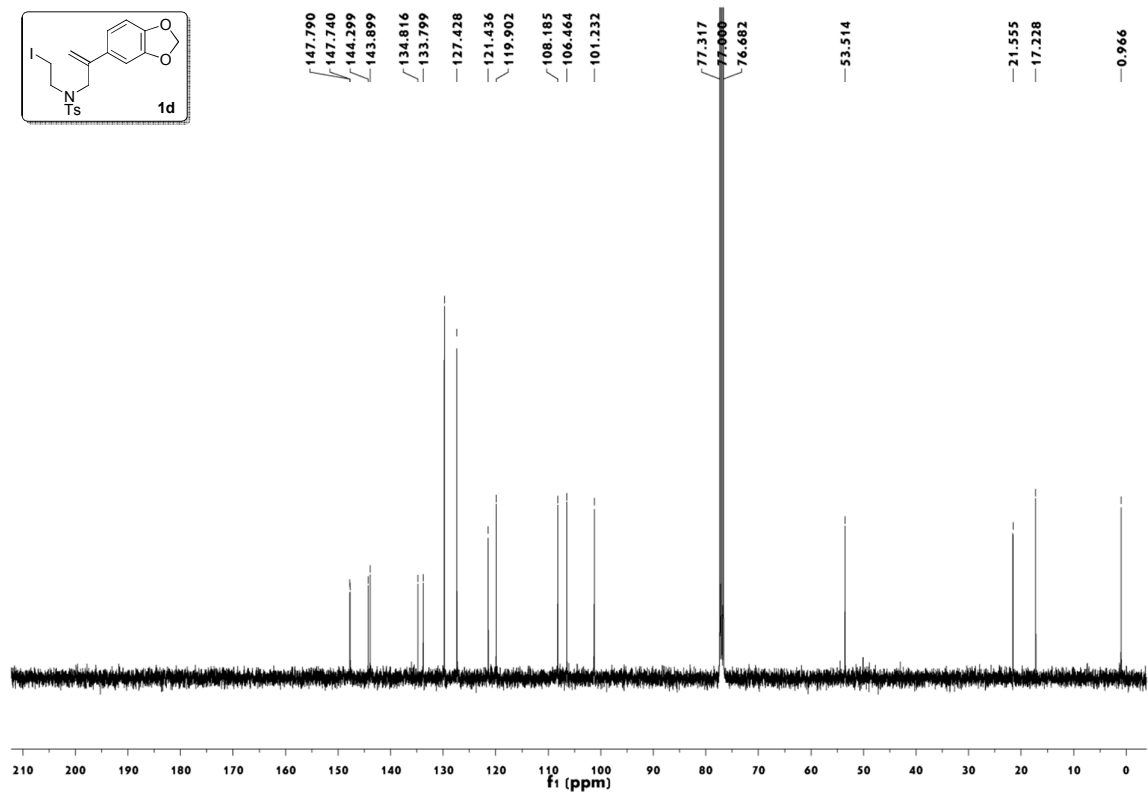

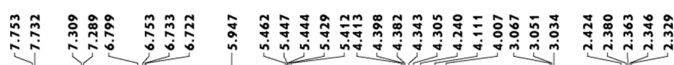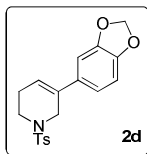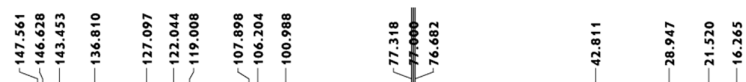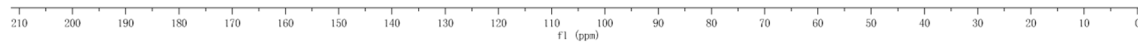

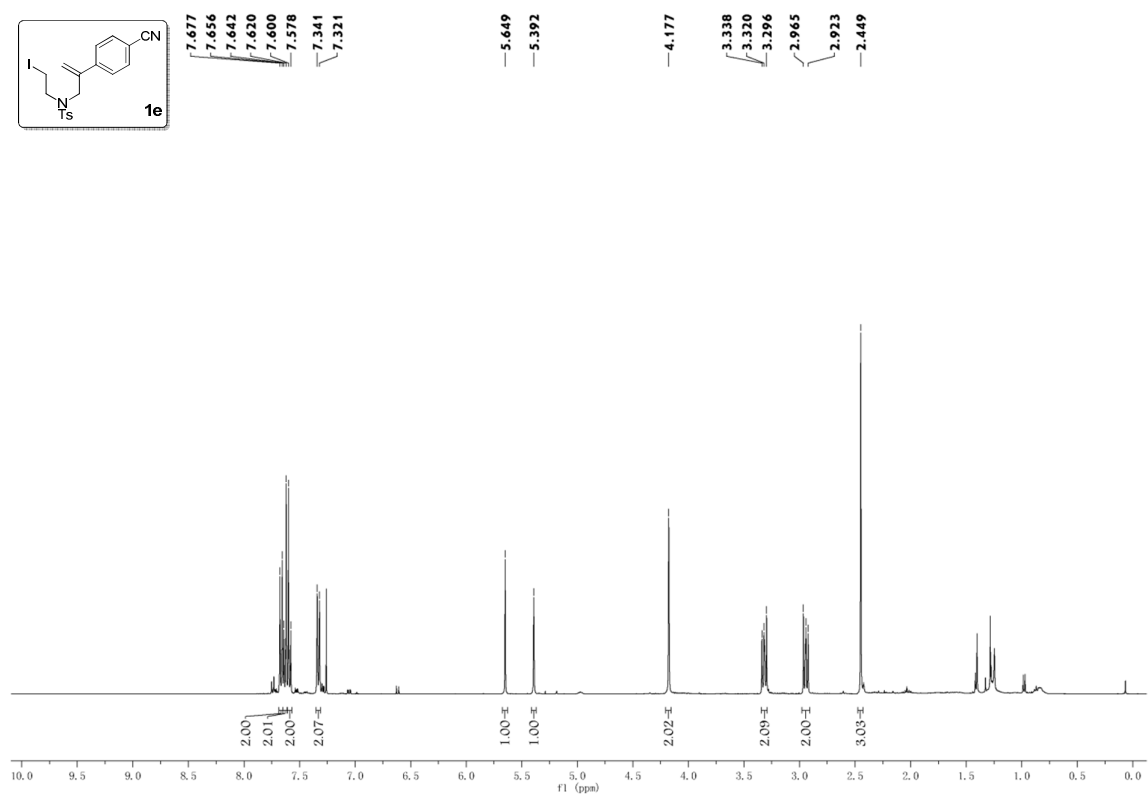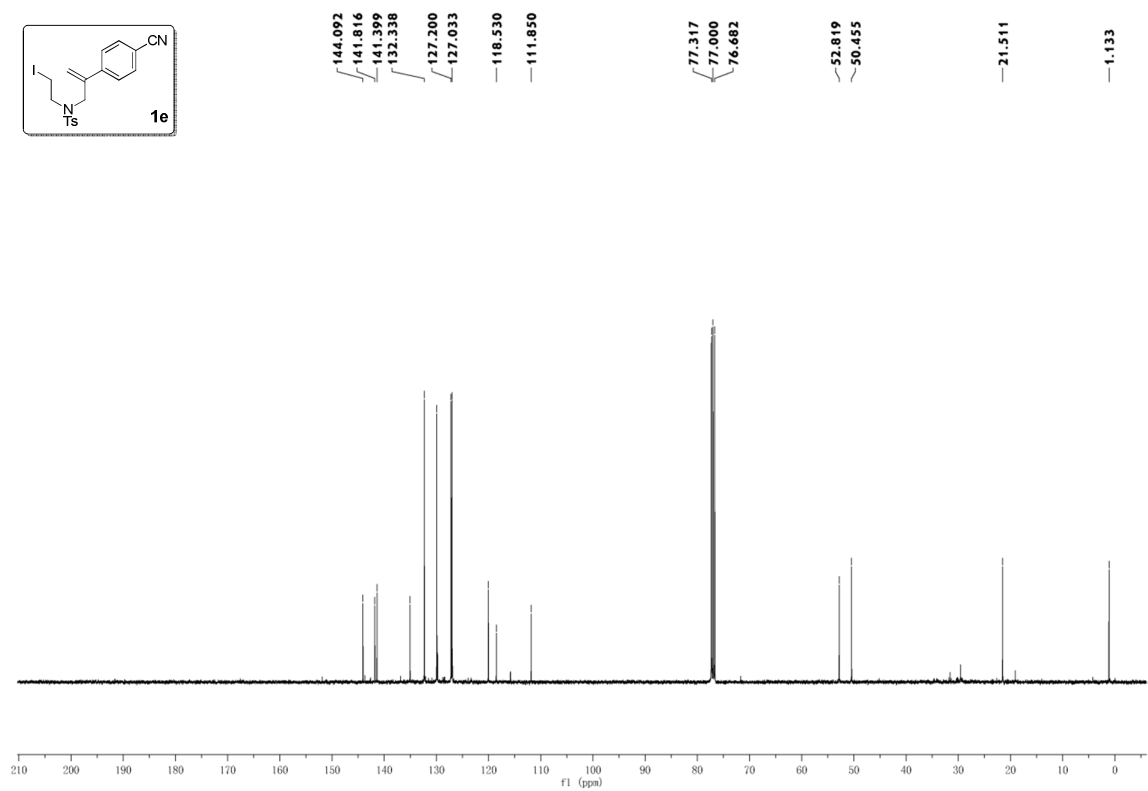

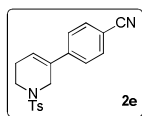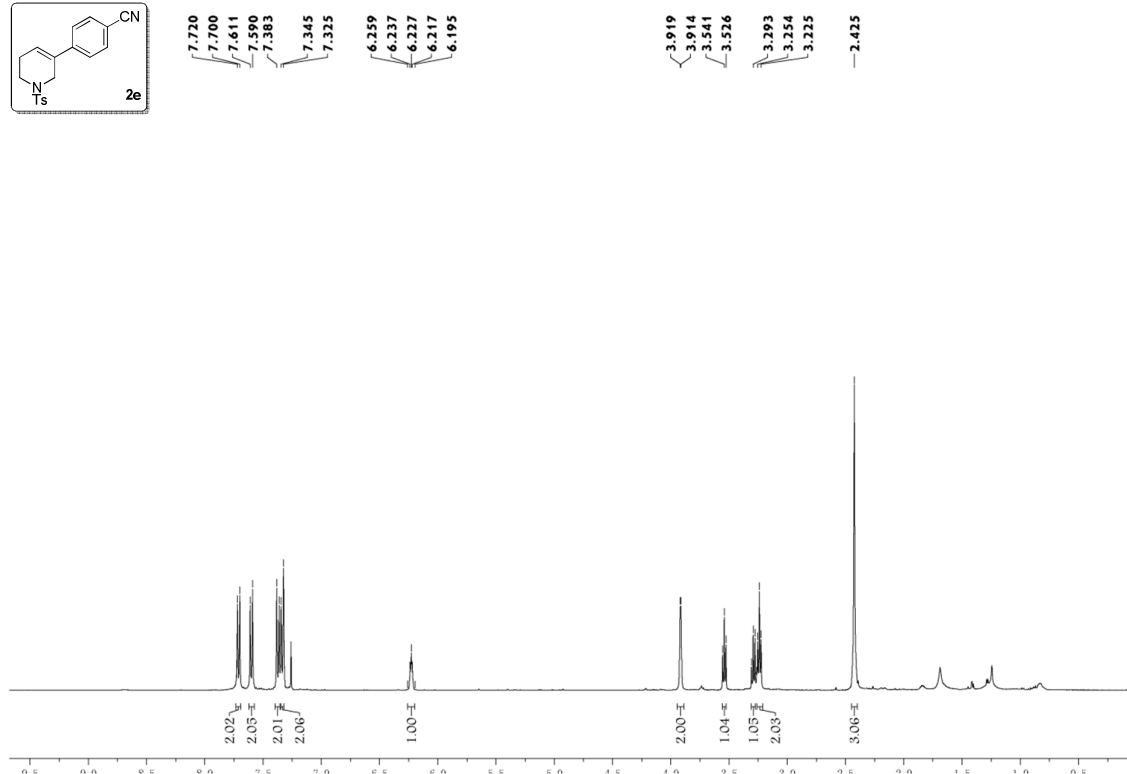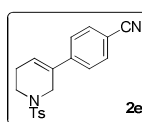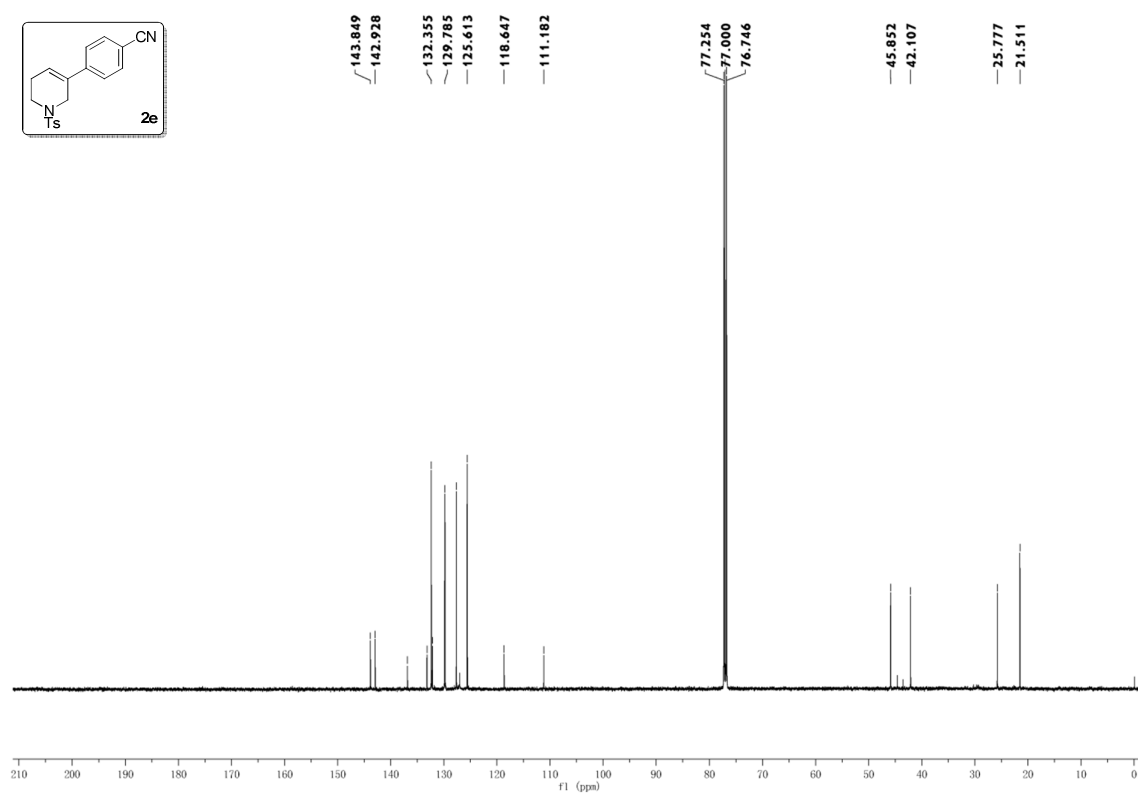

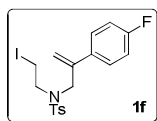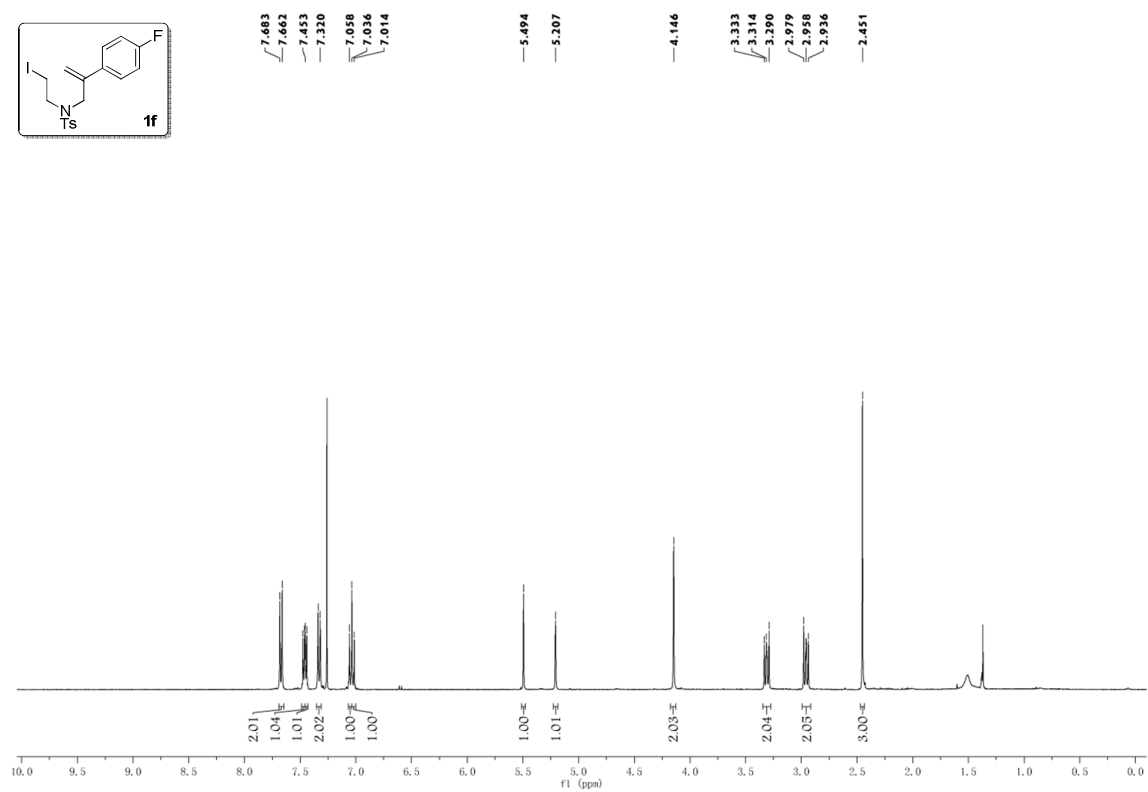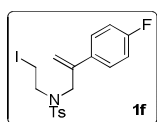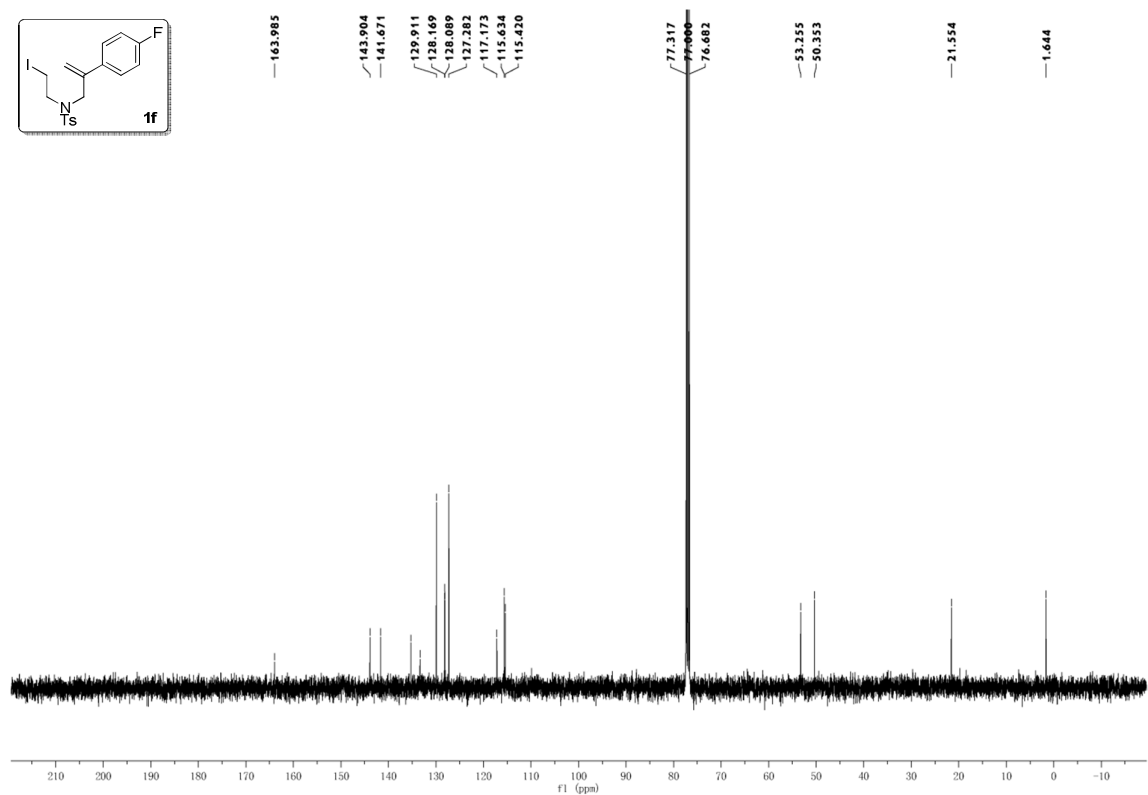



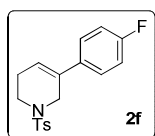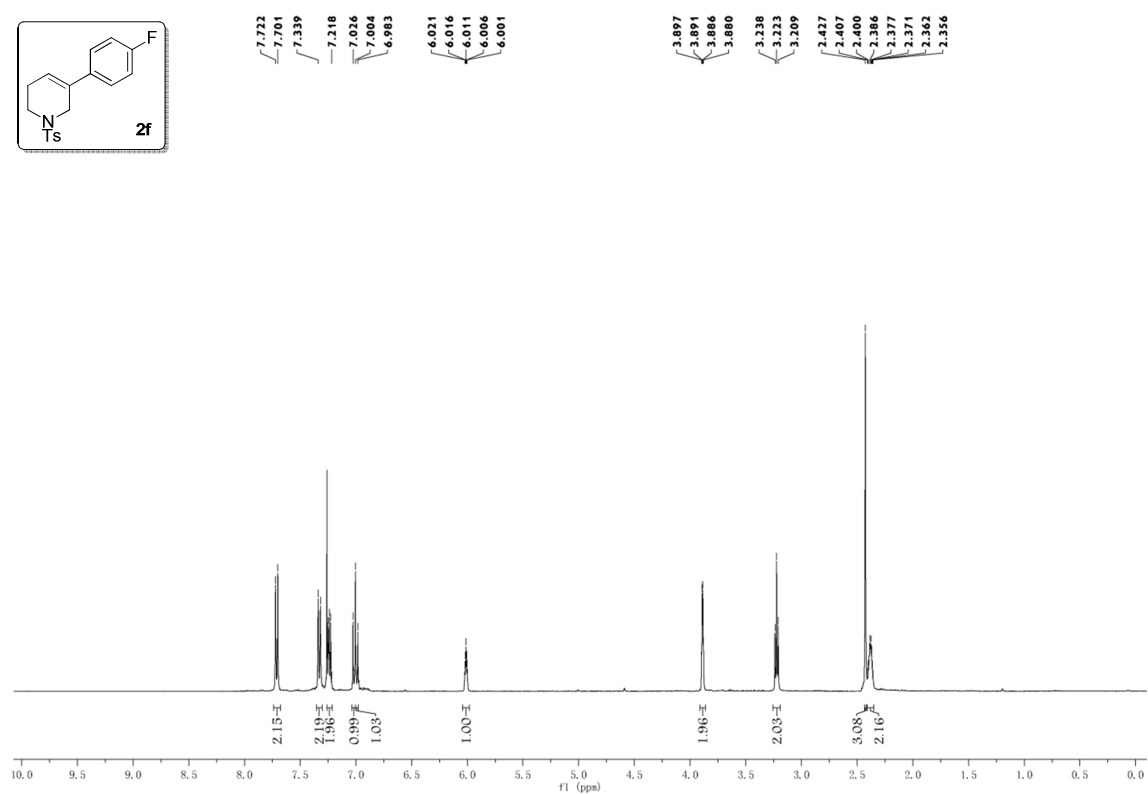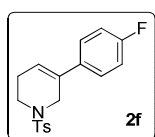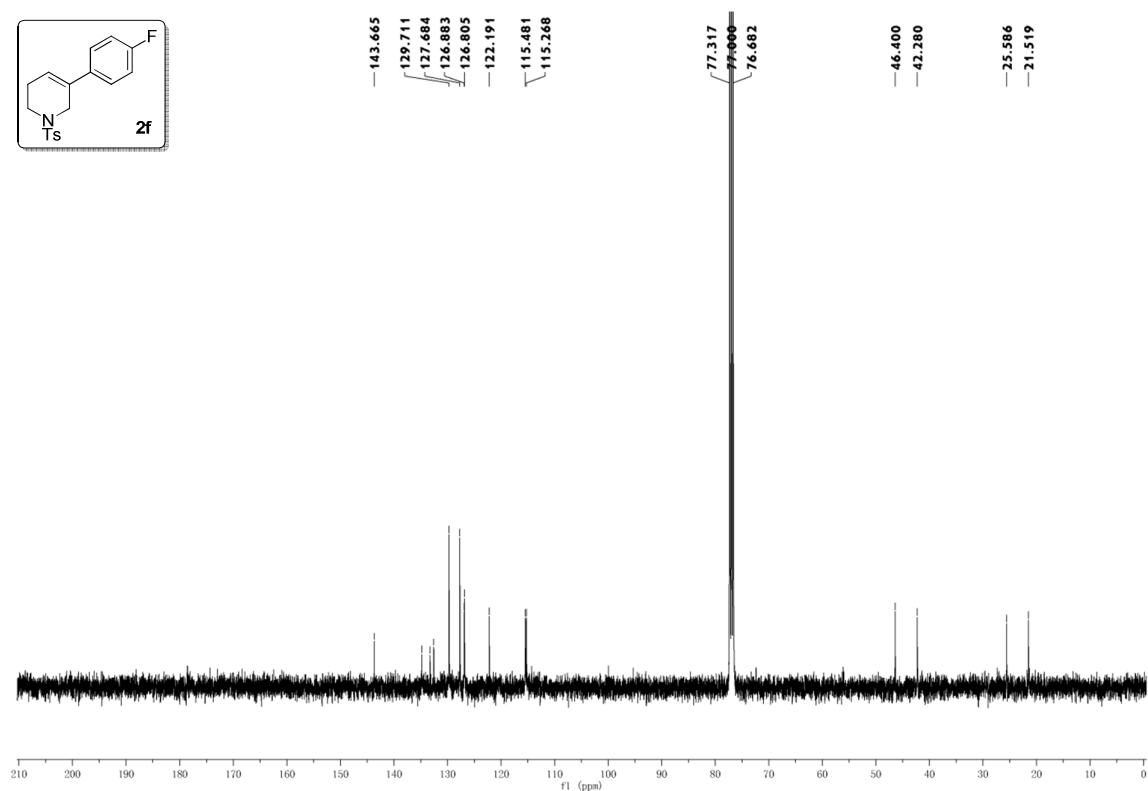

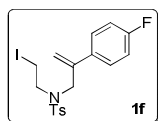

---113.379

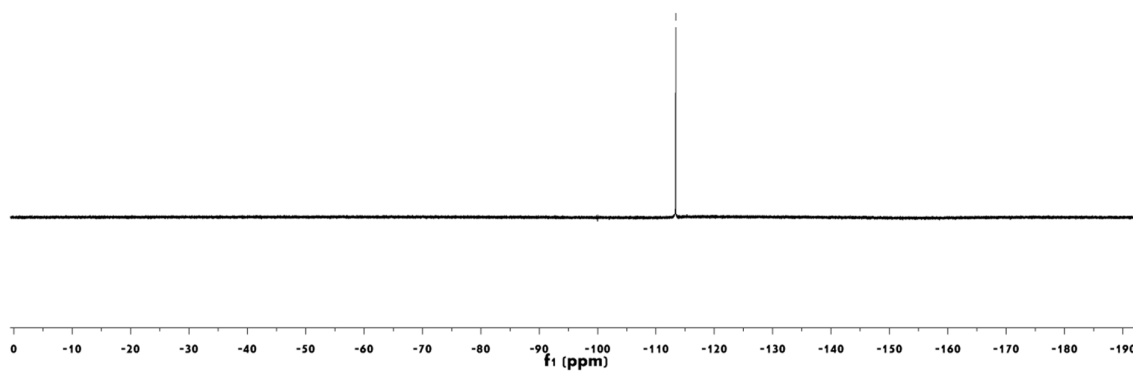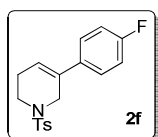

---114.480

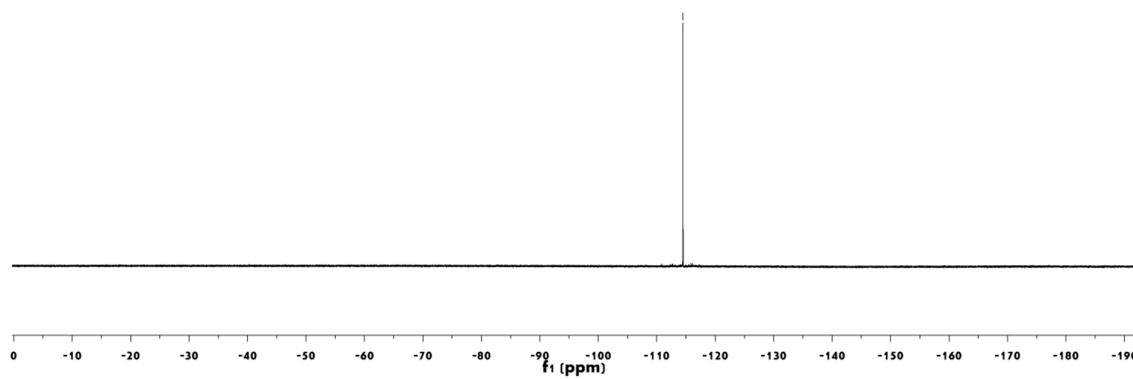

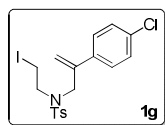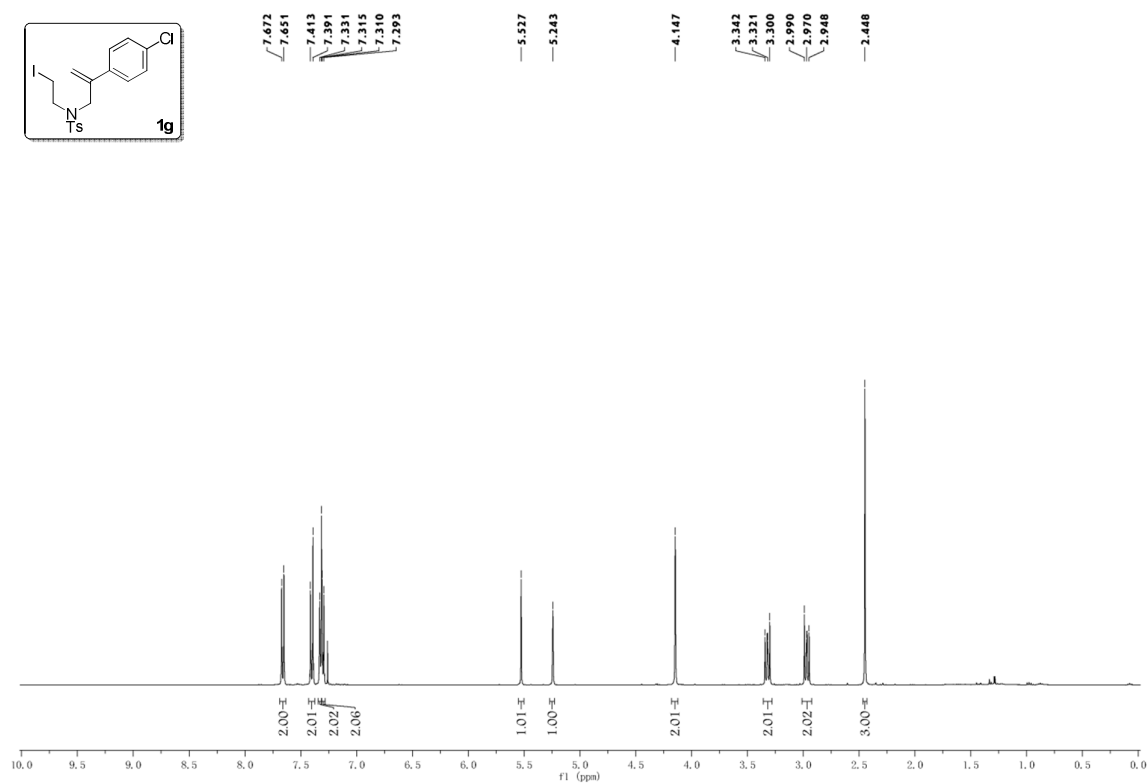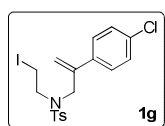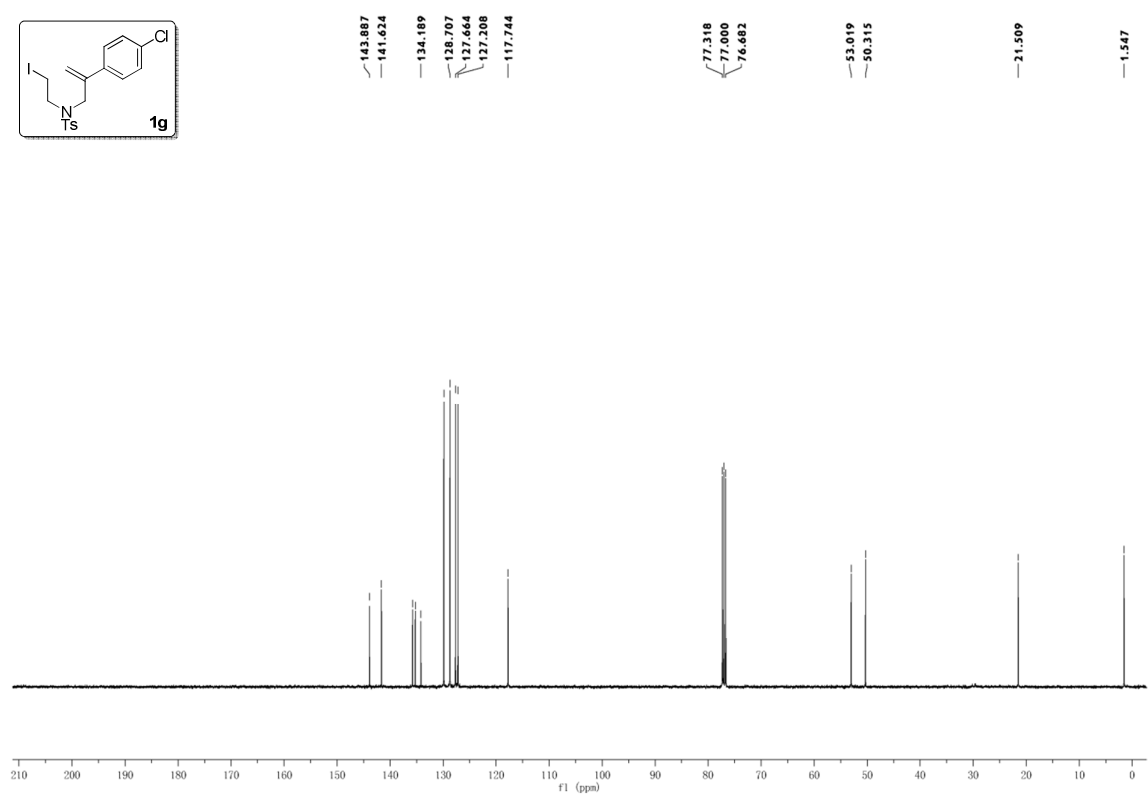

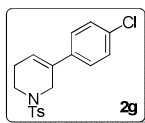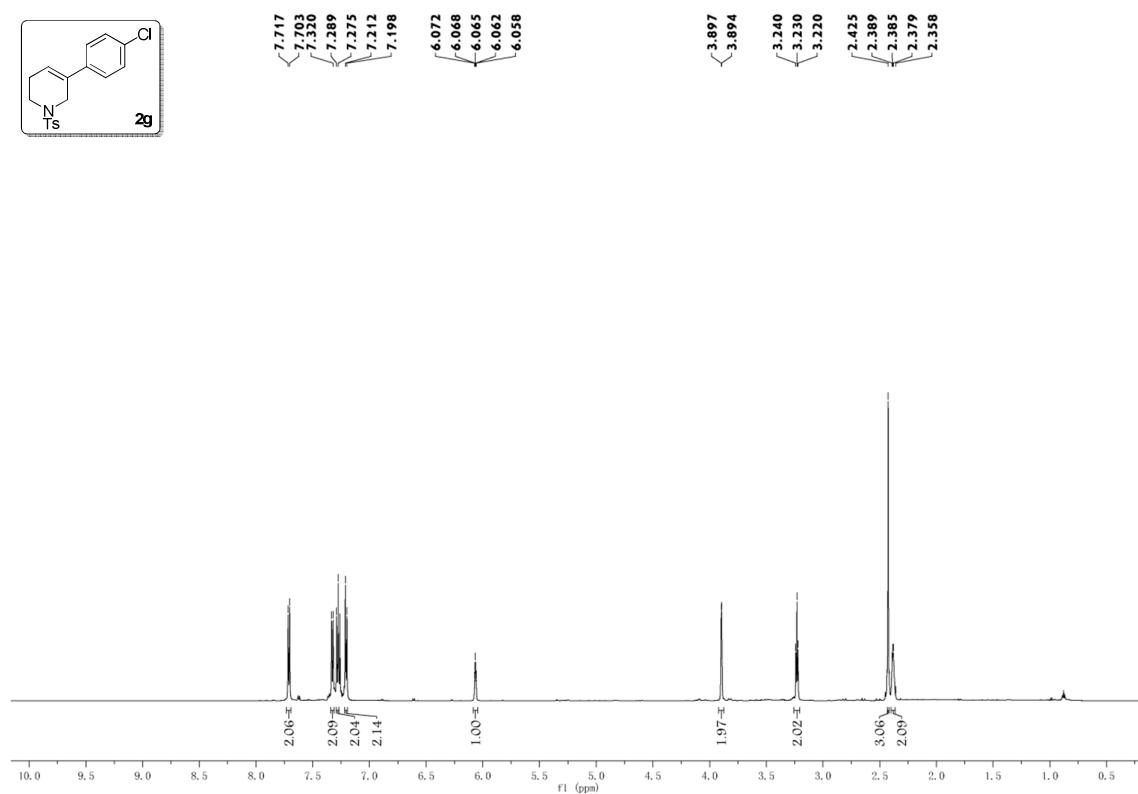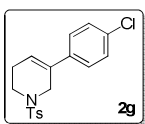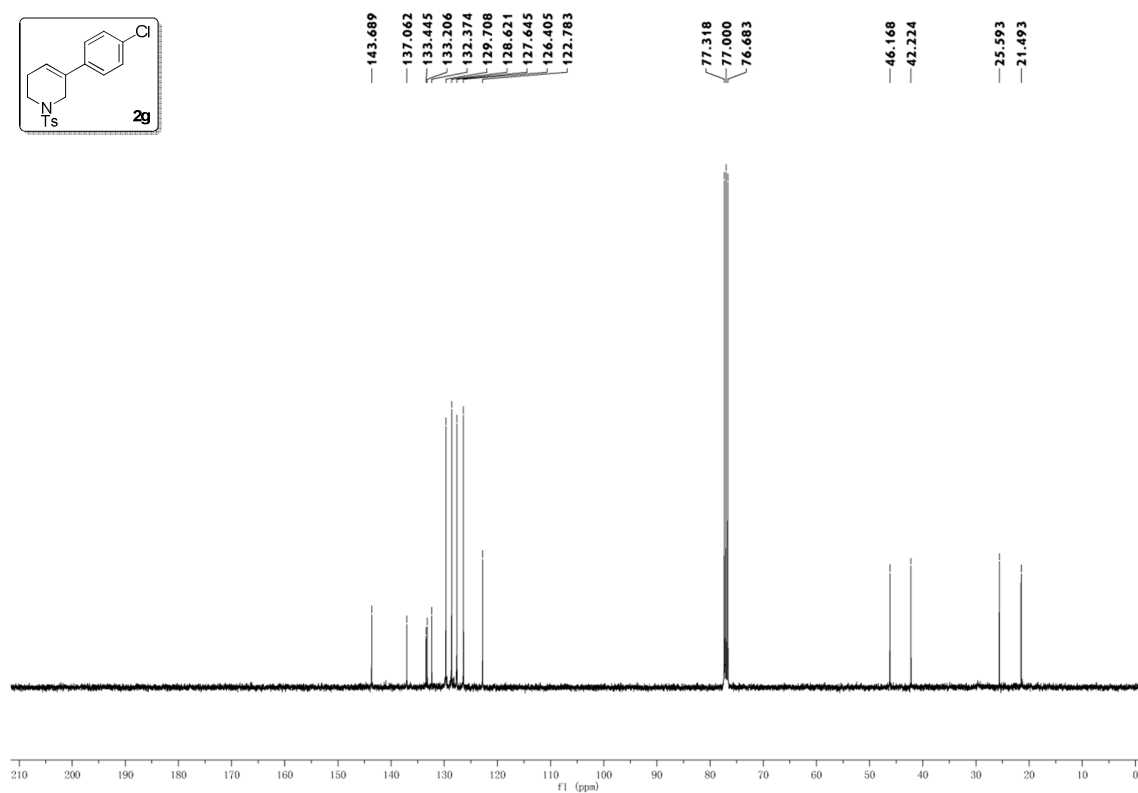

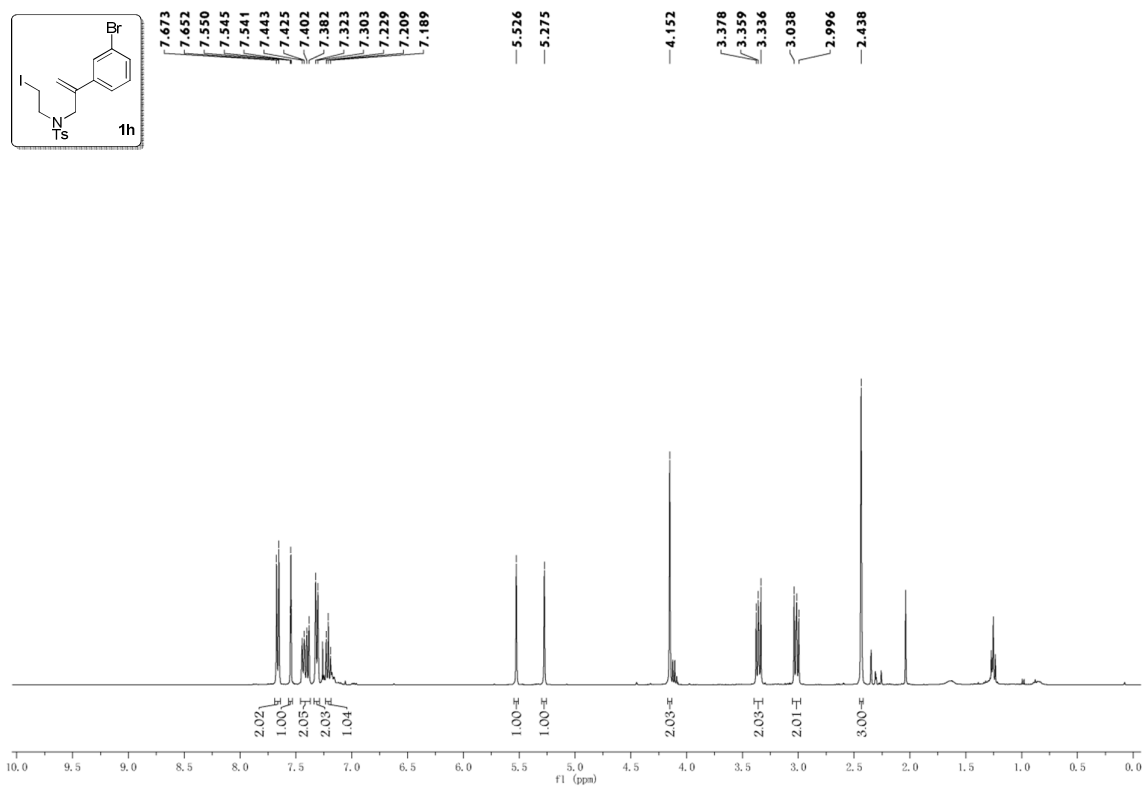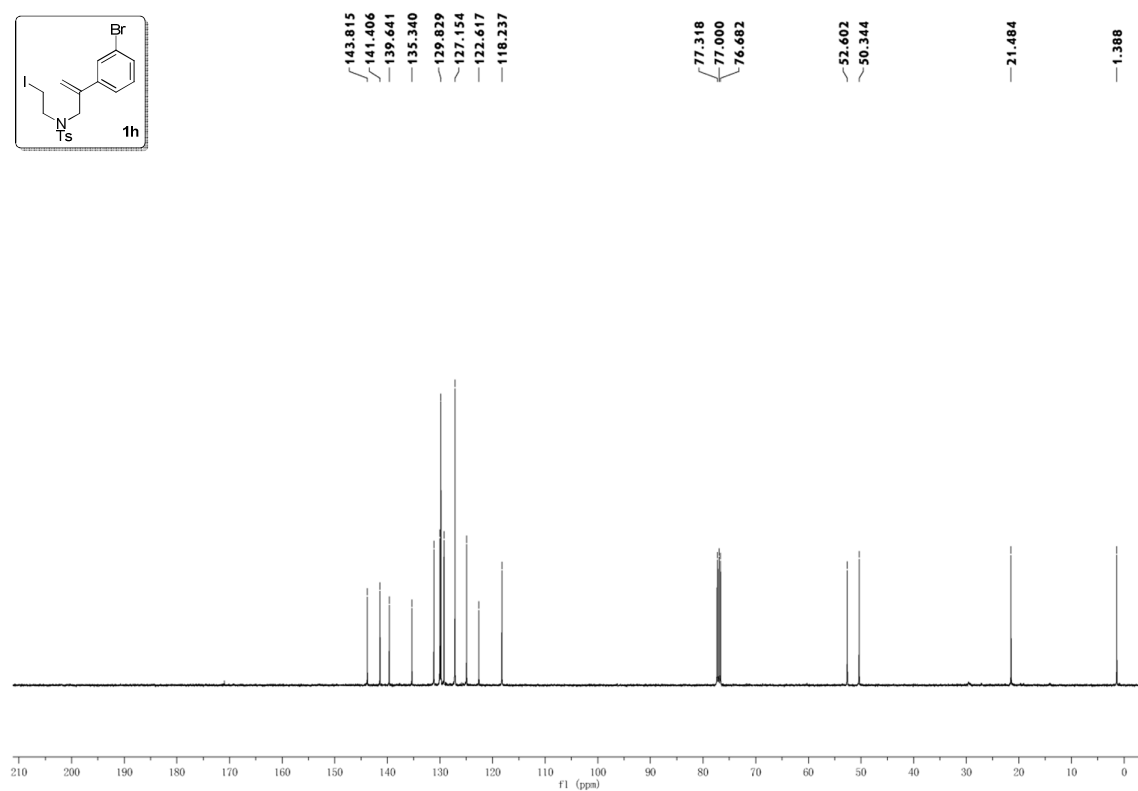

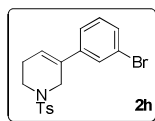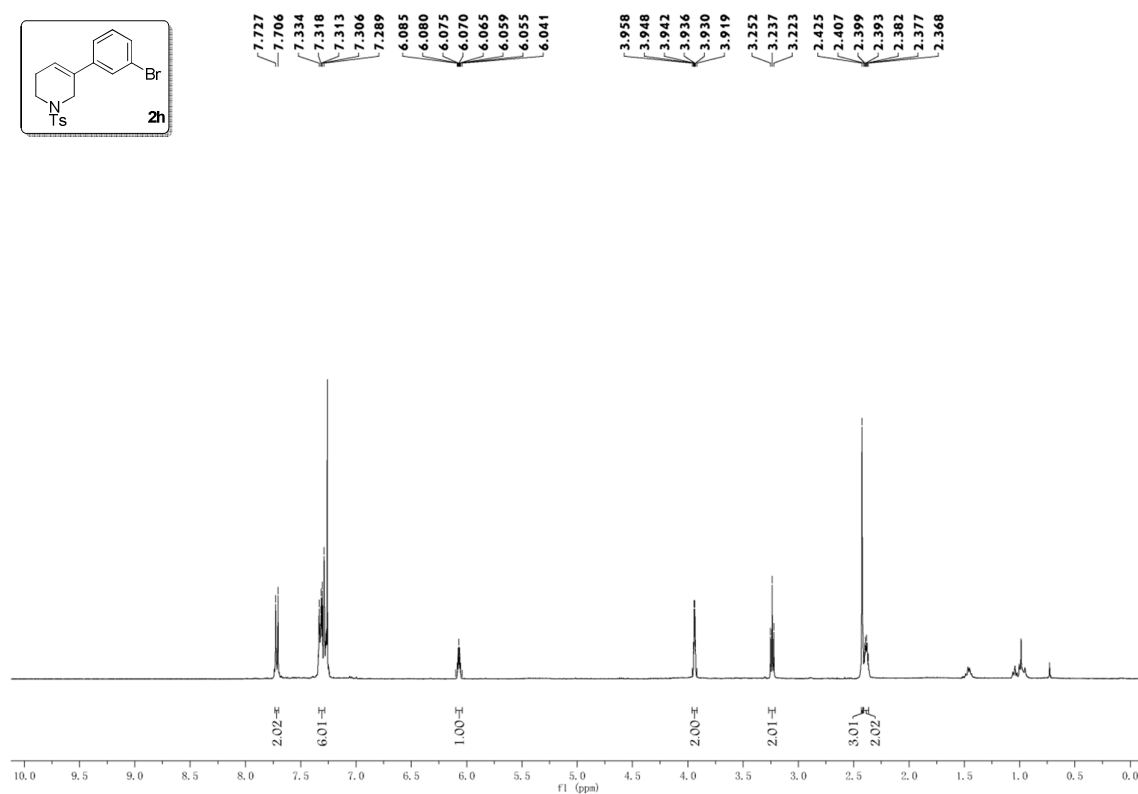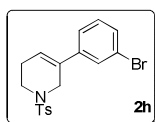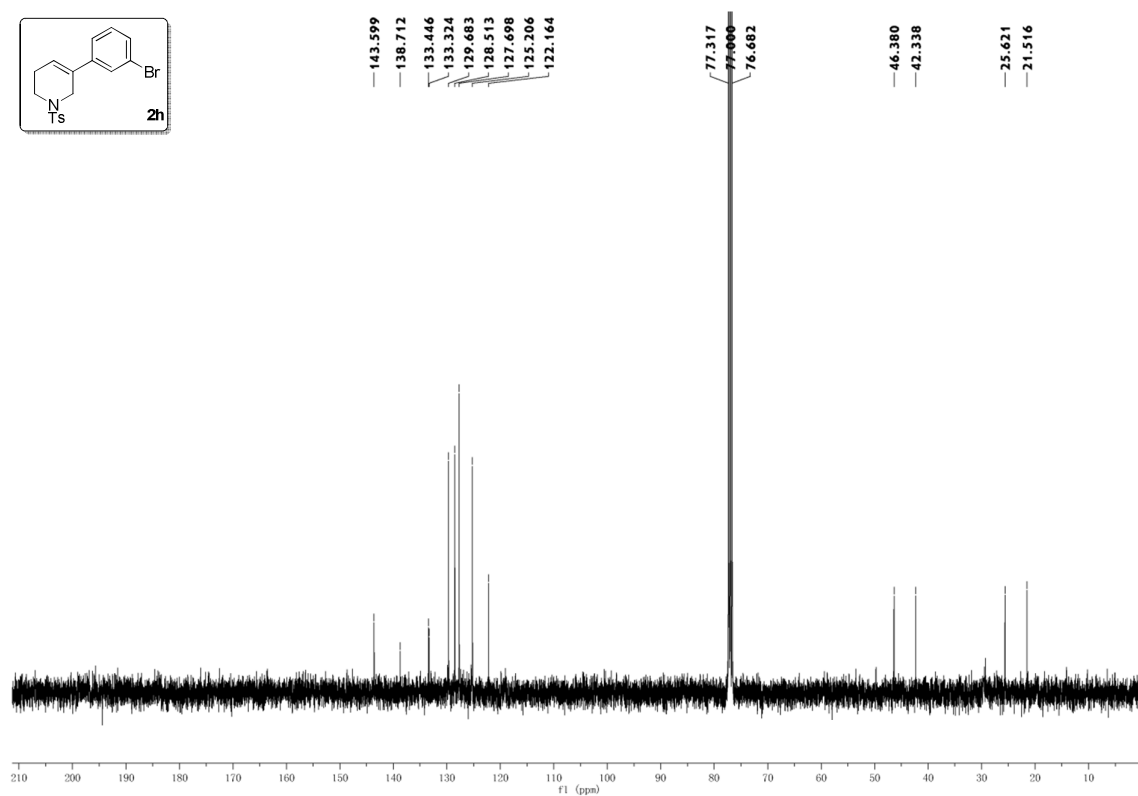

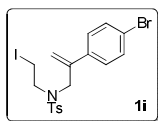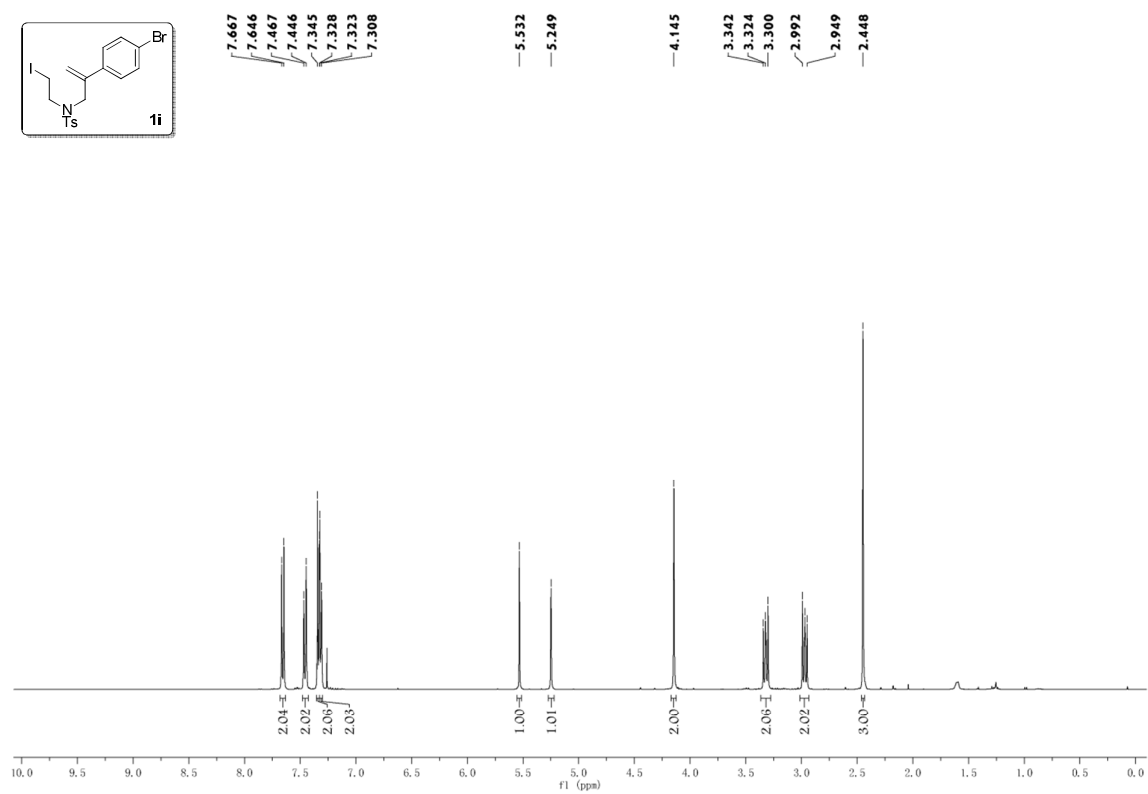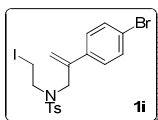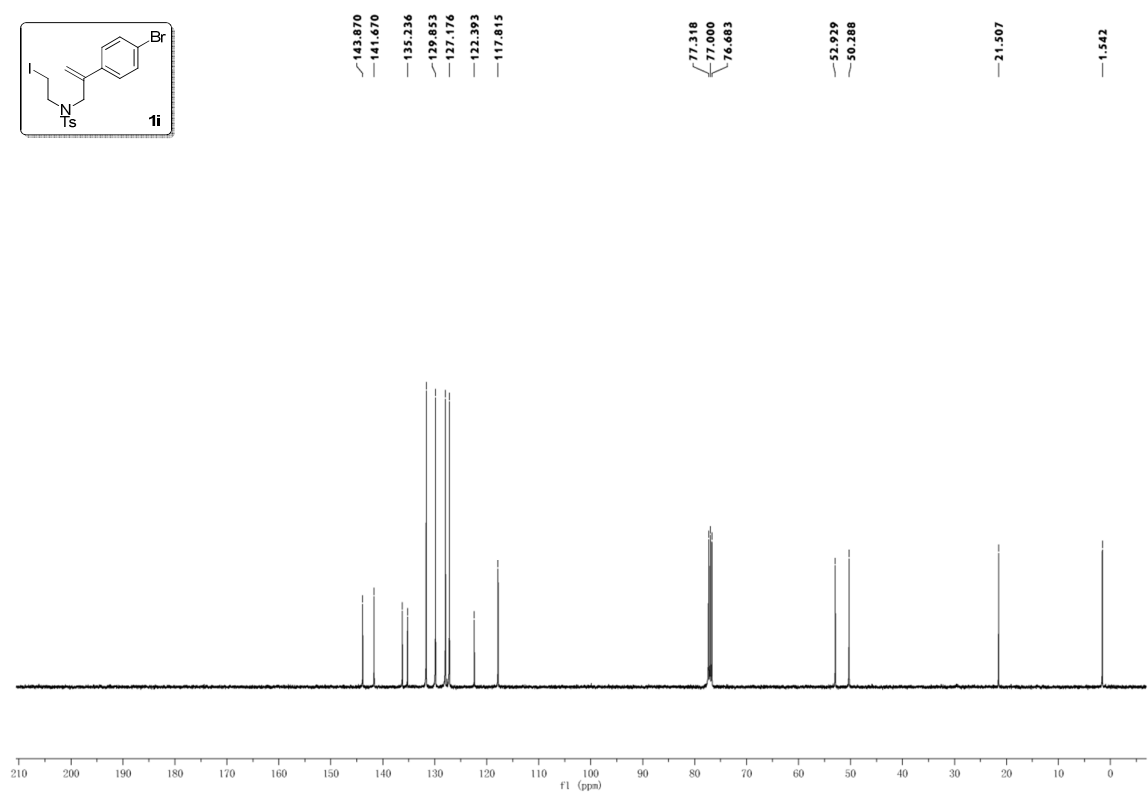

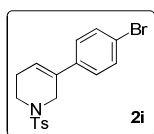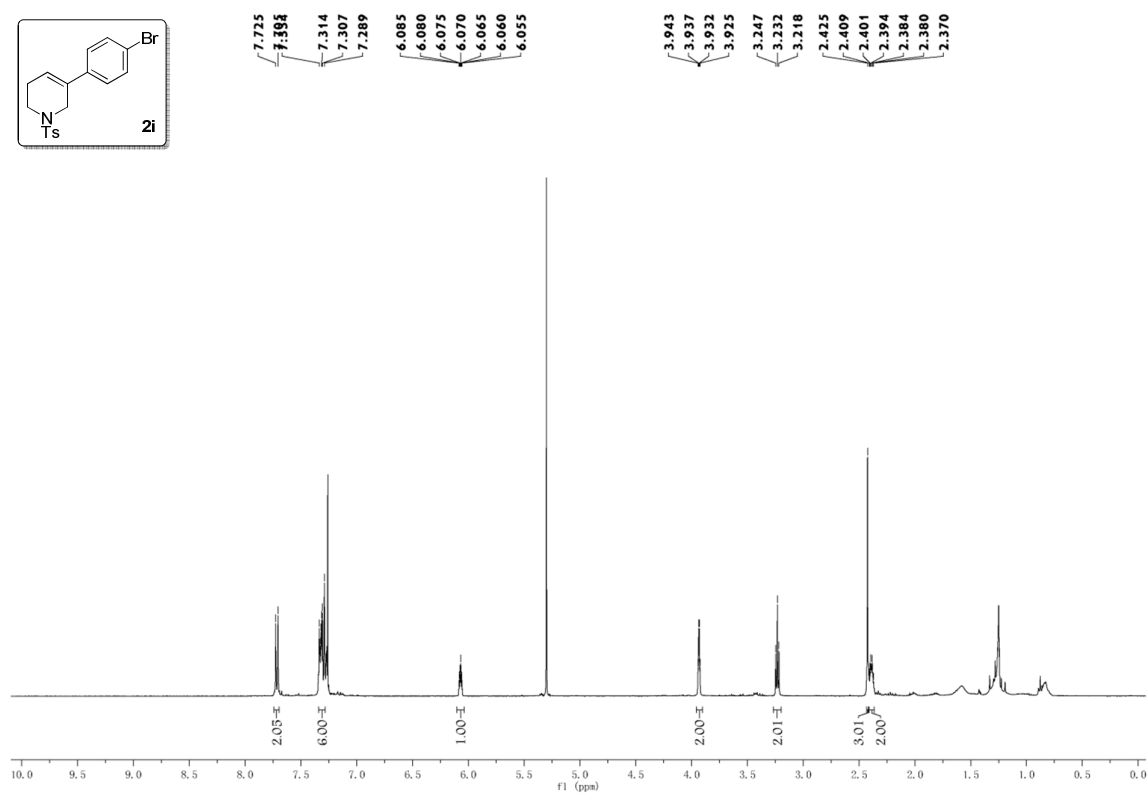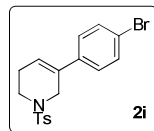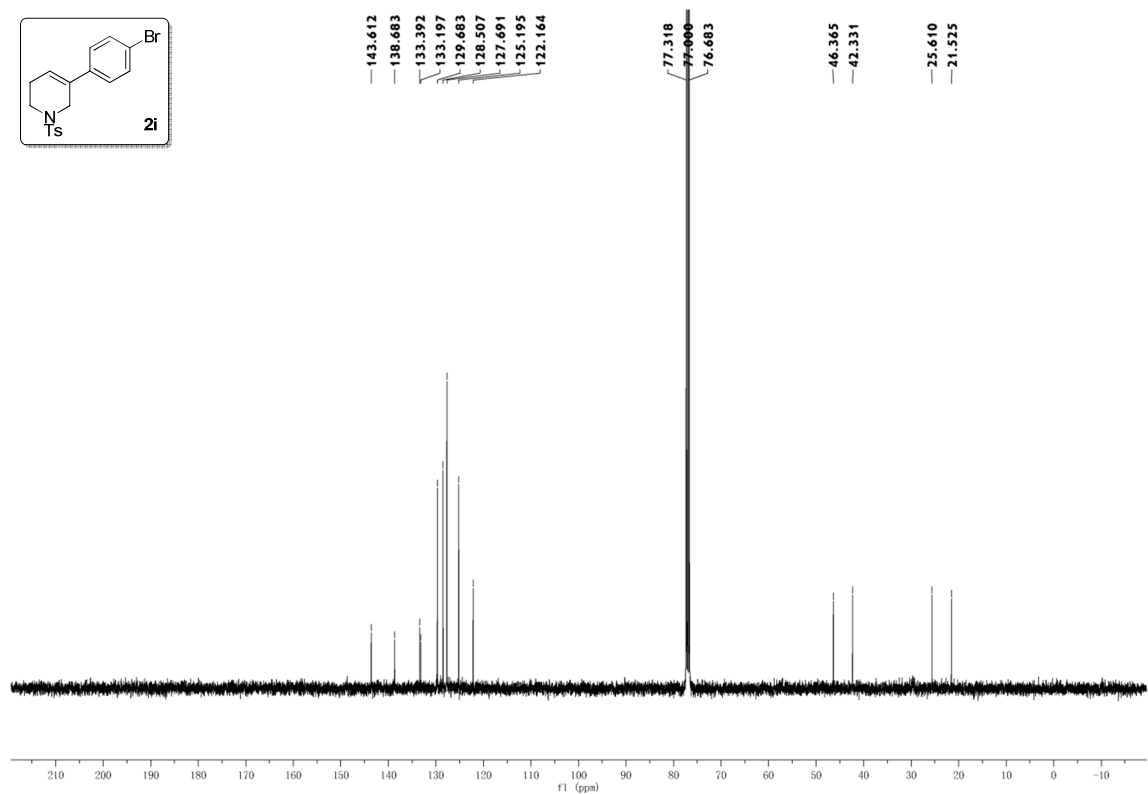



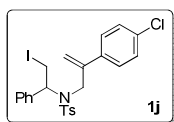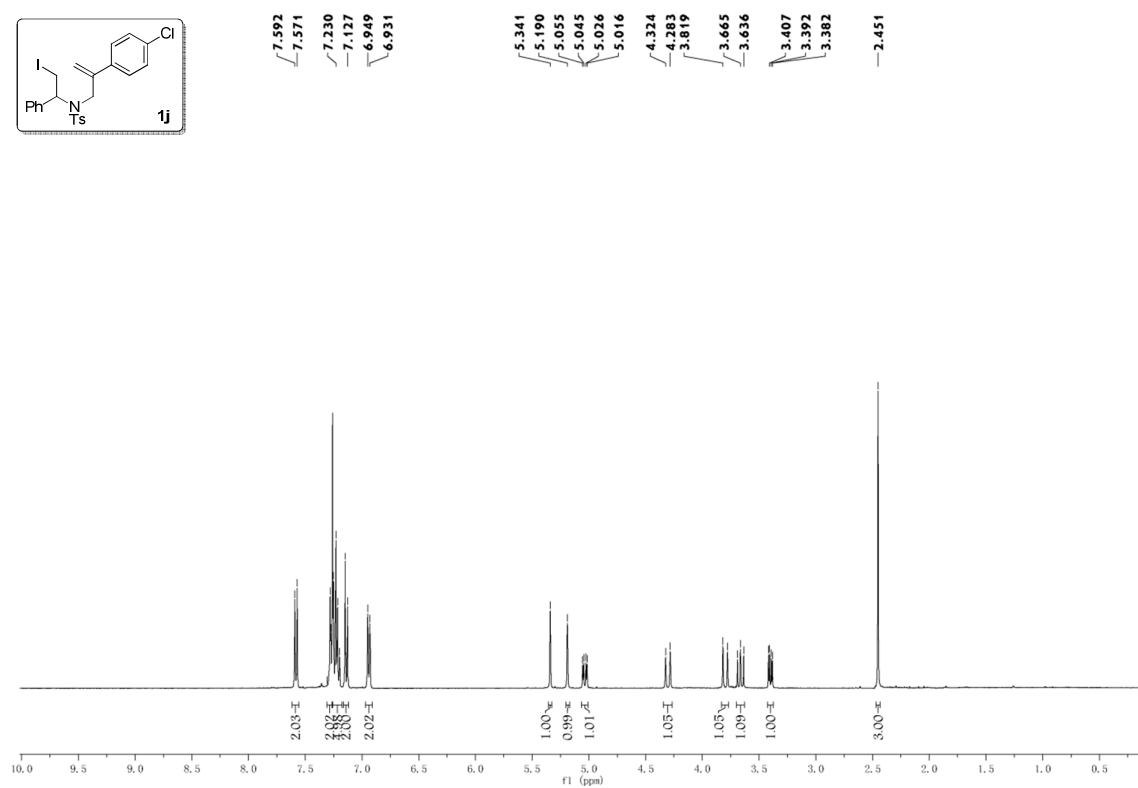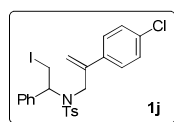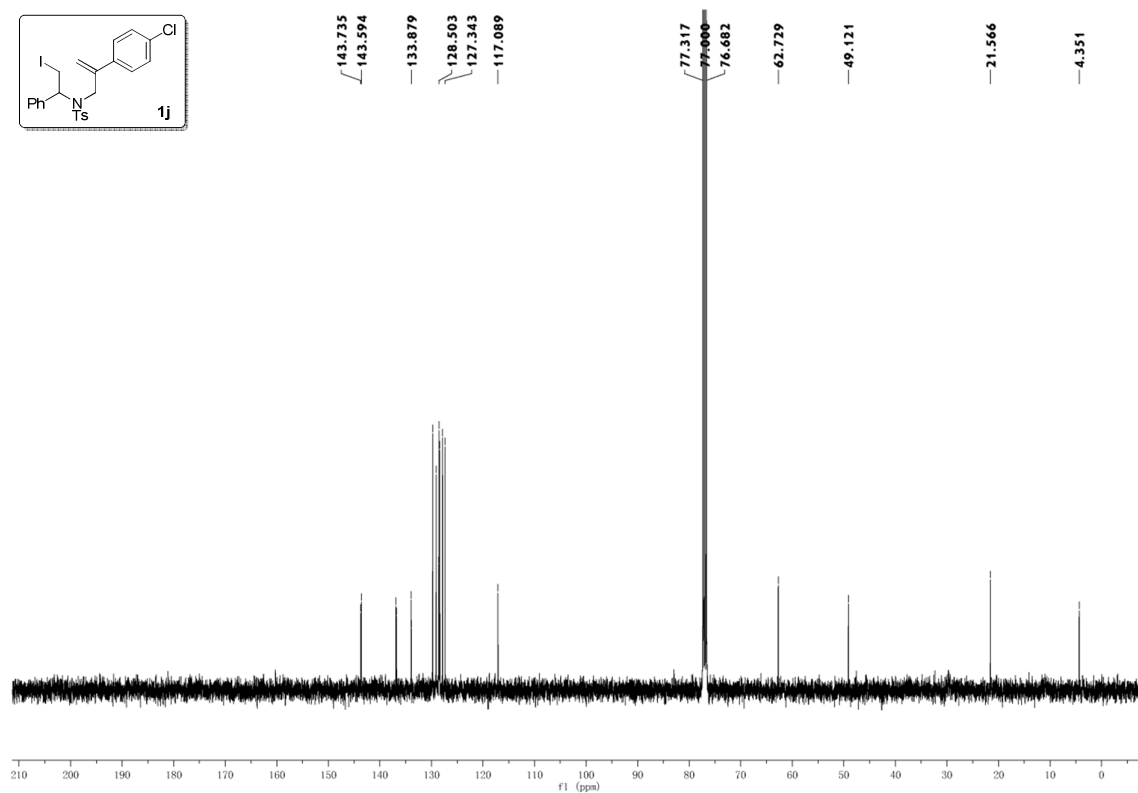

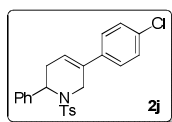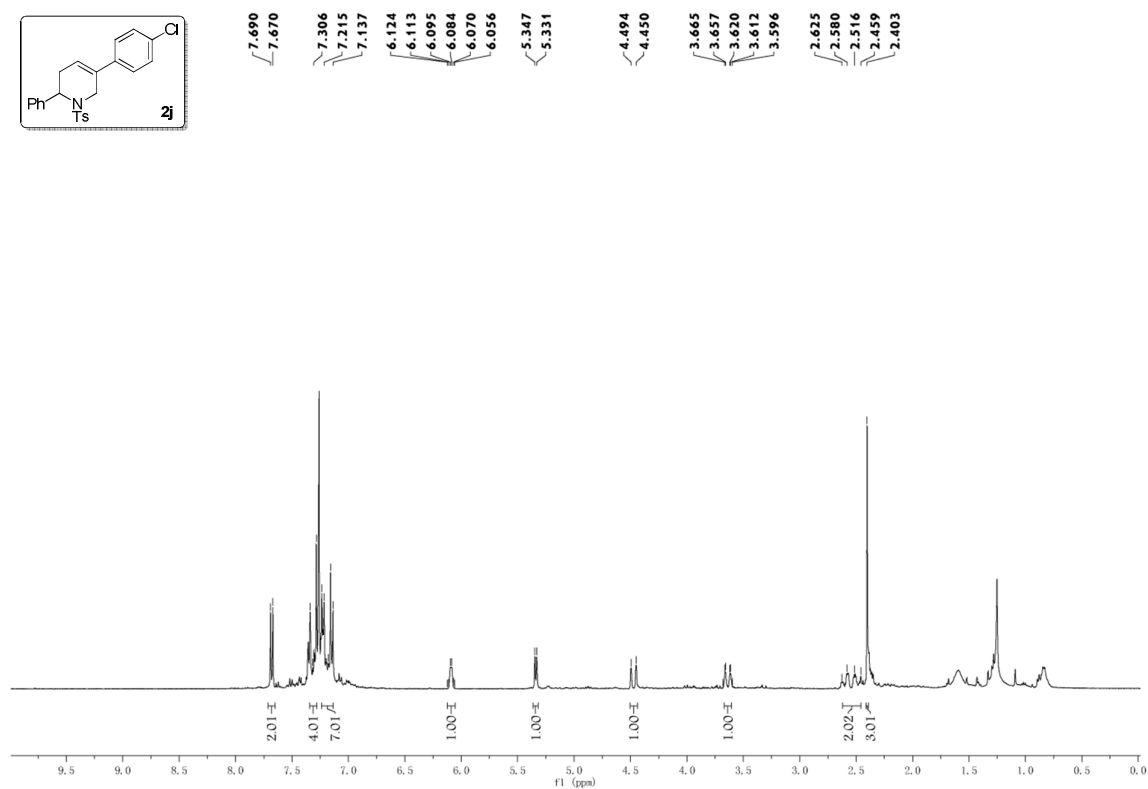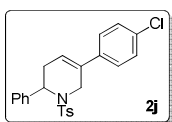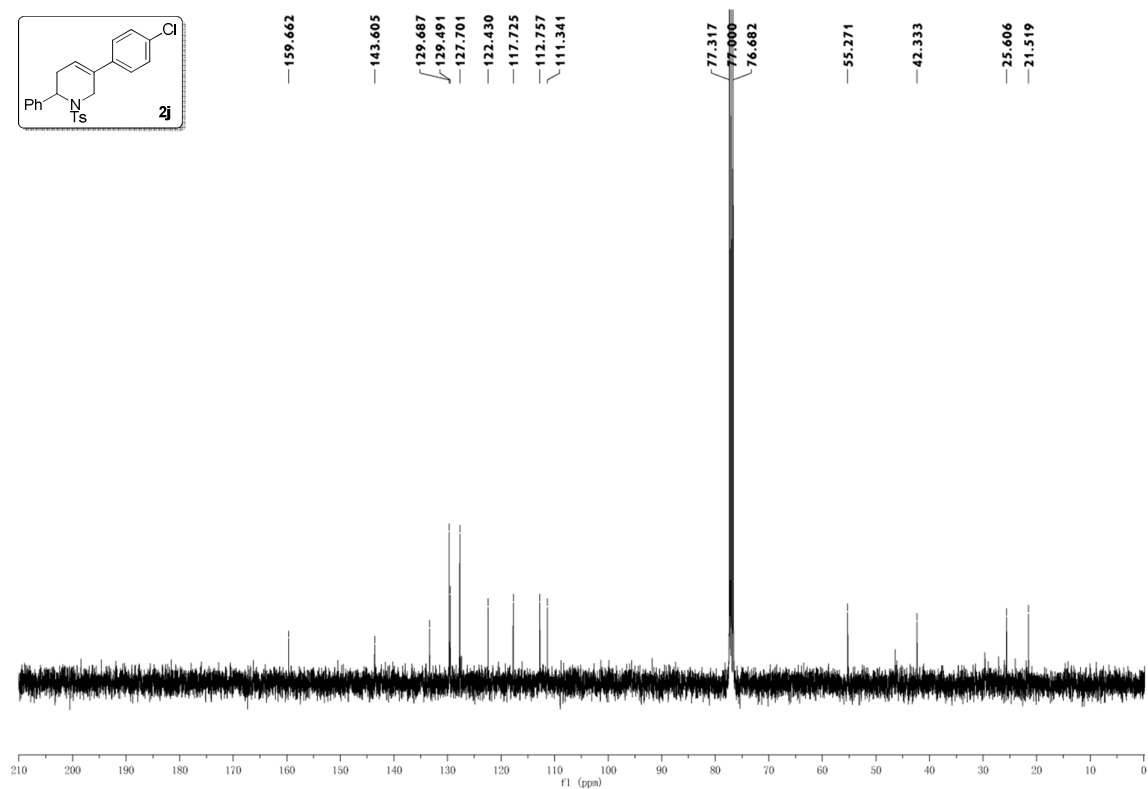

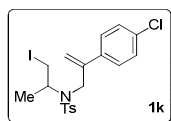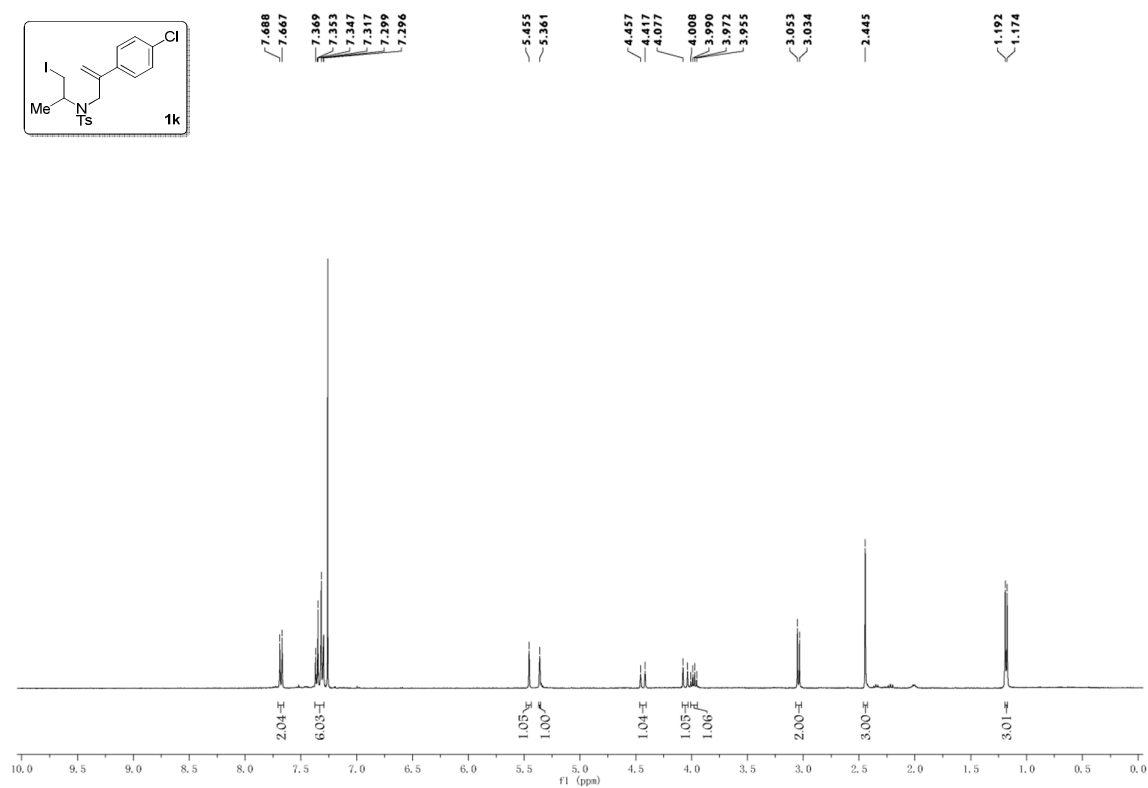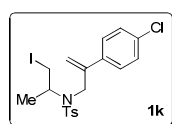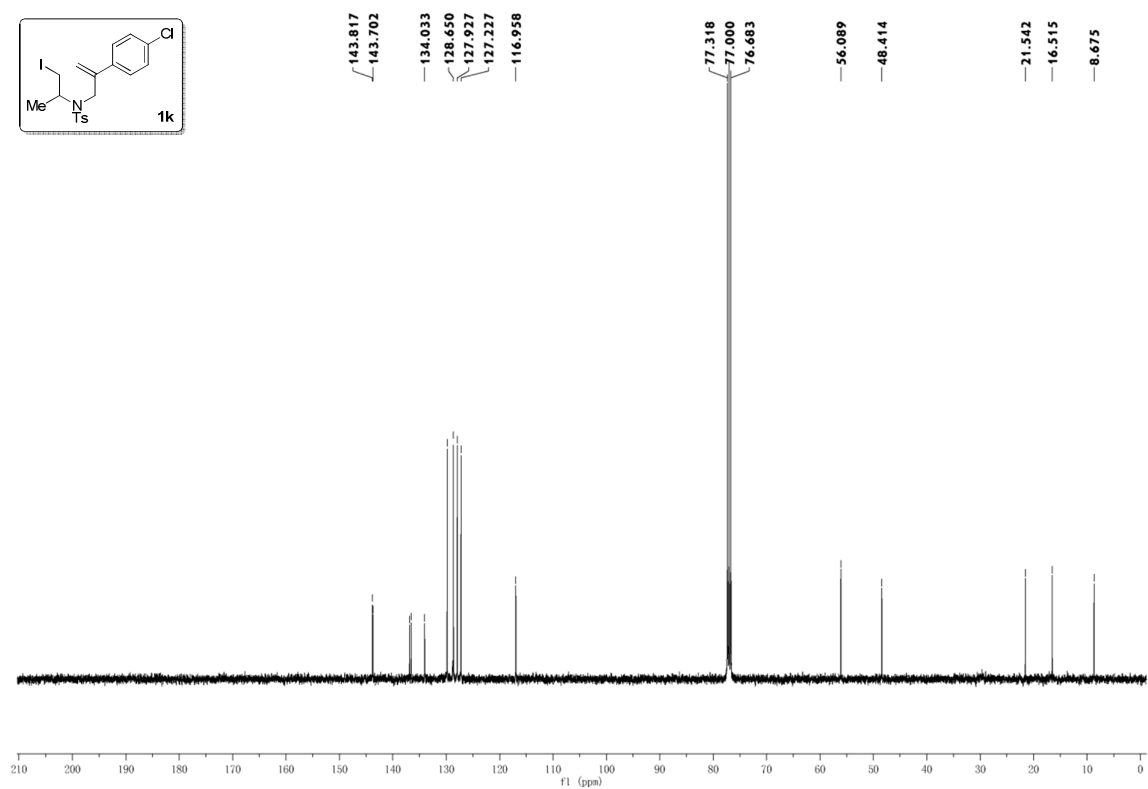

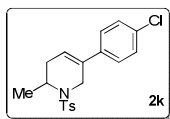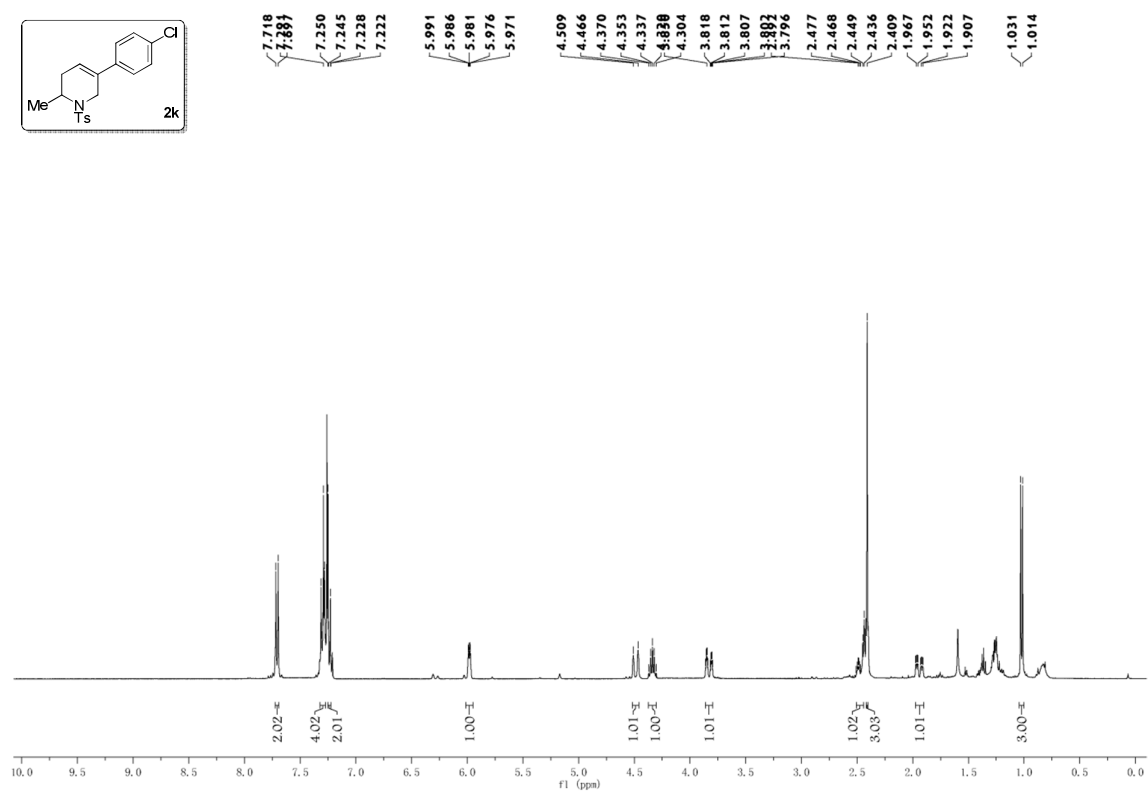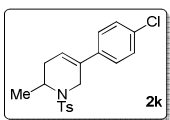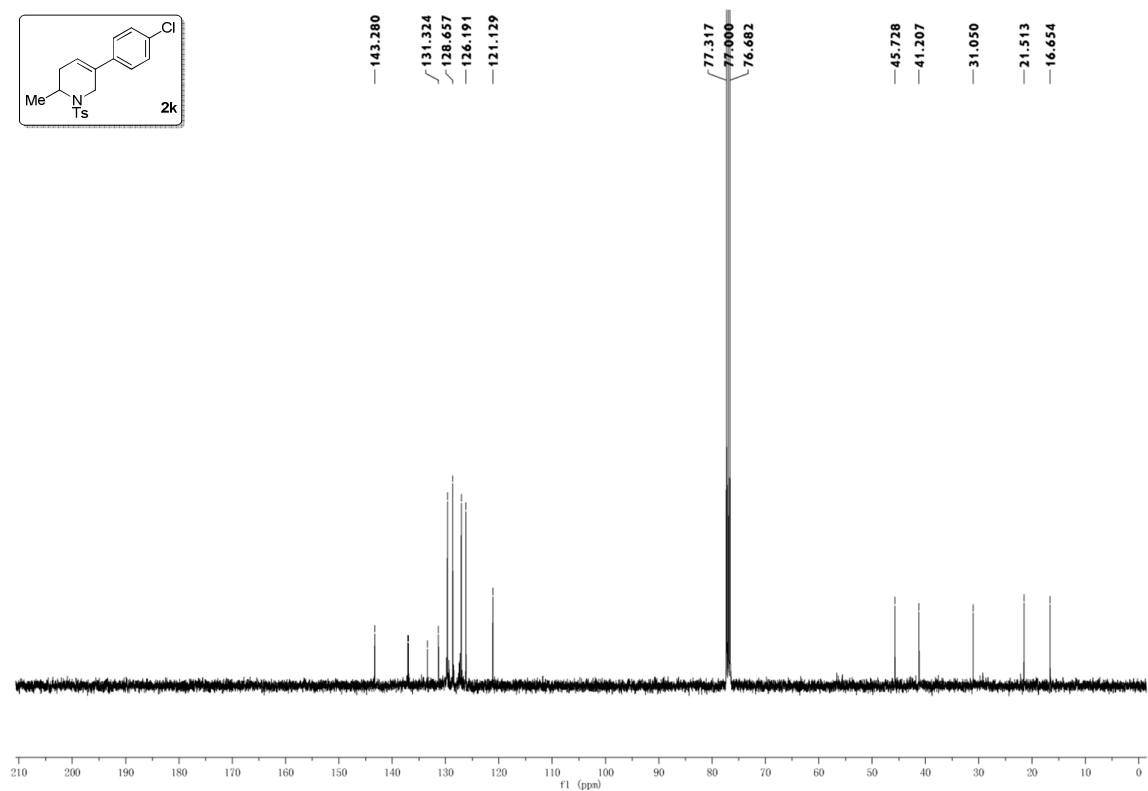

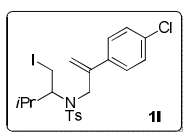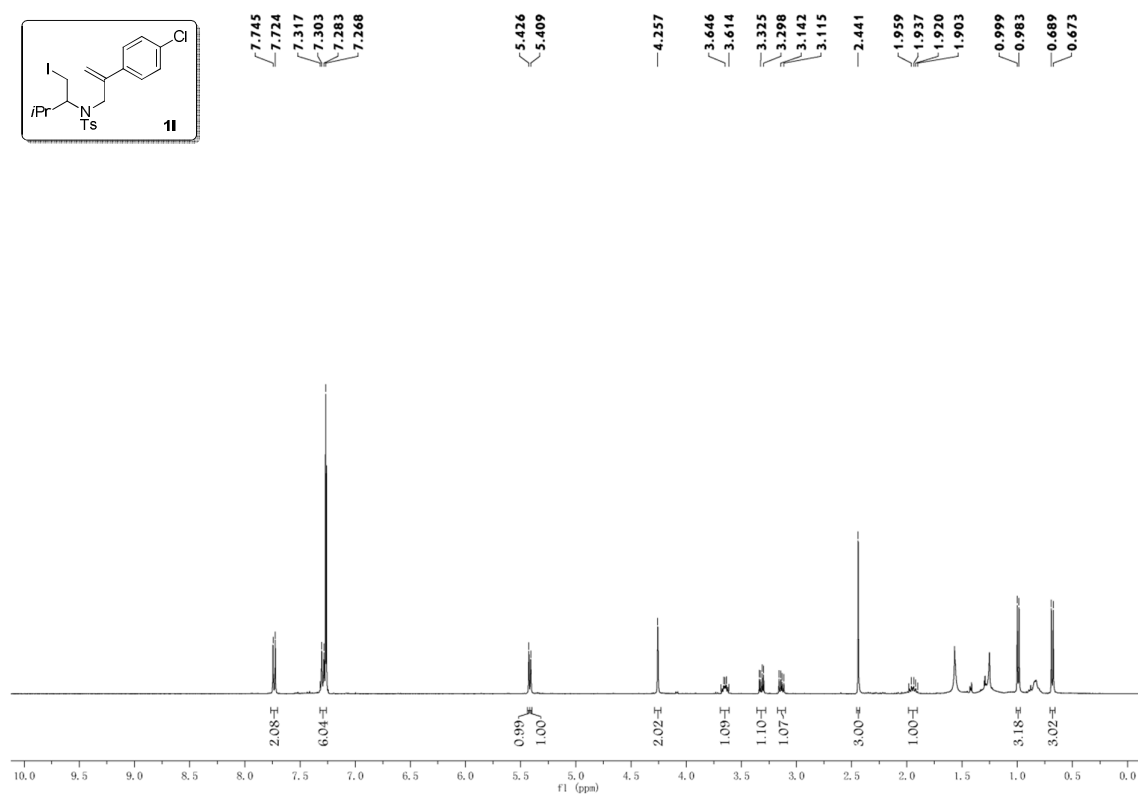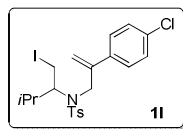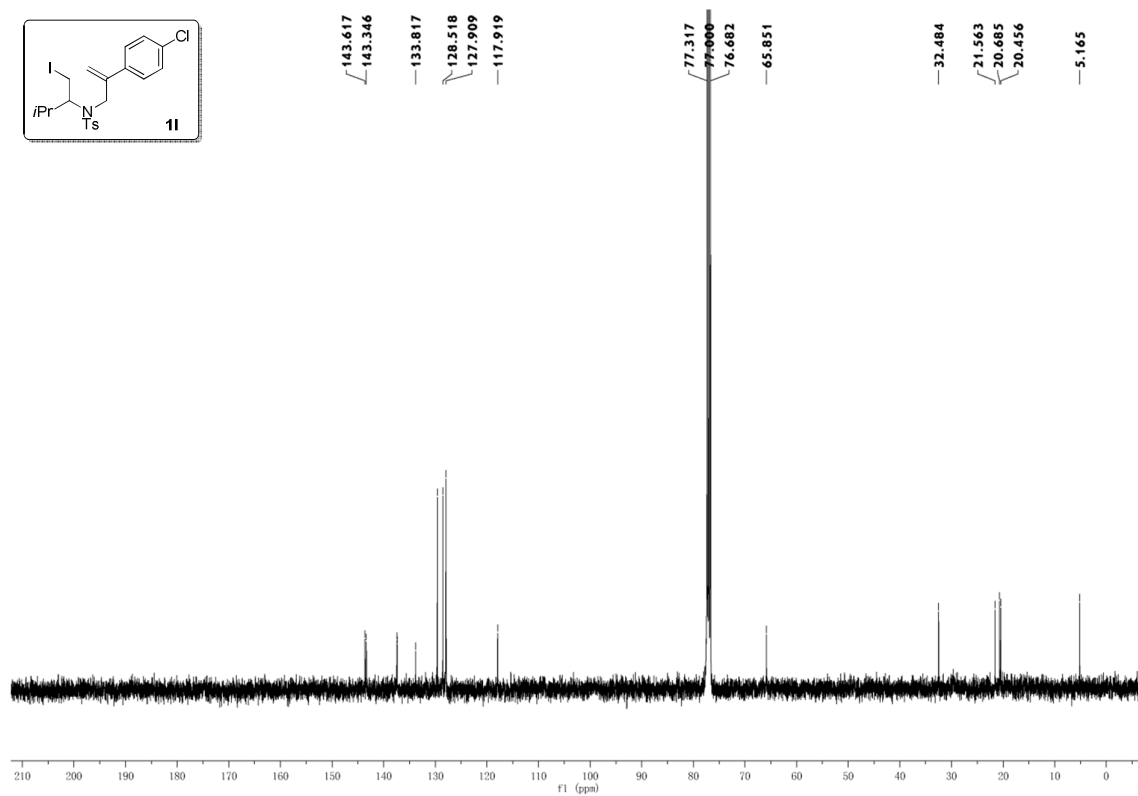

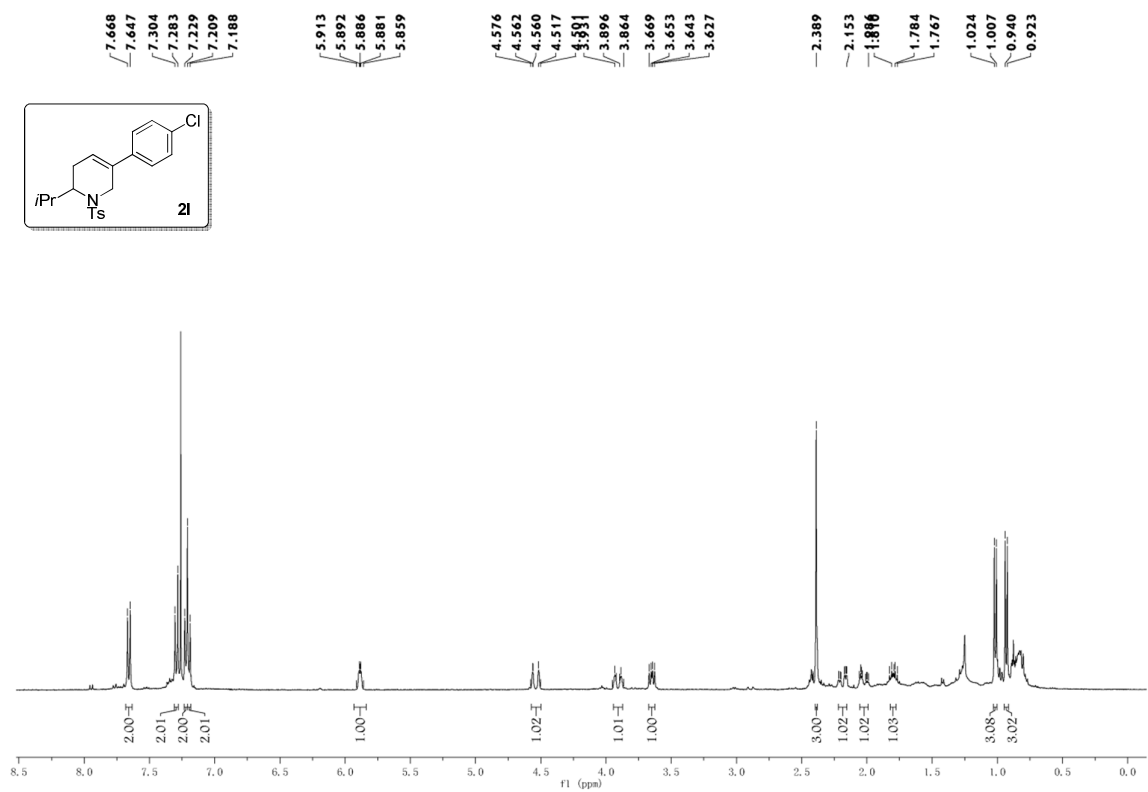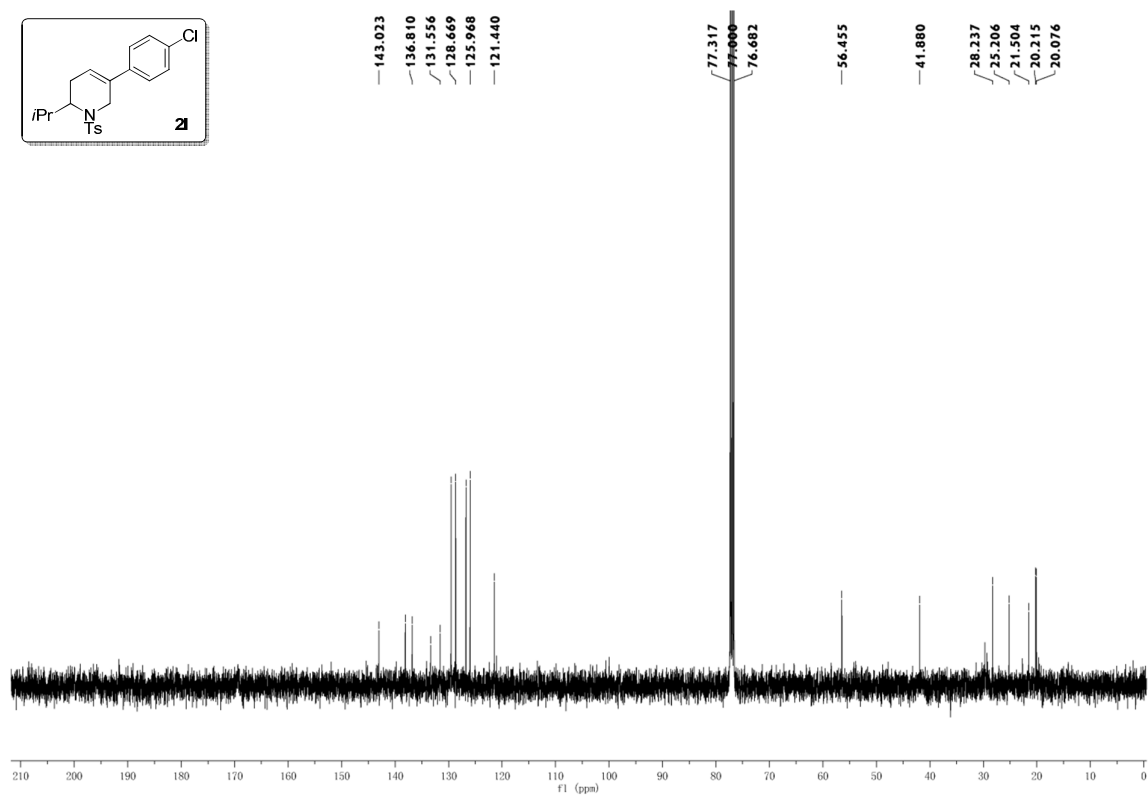

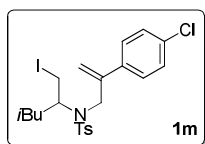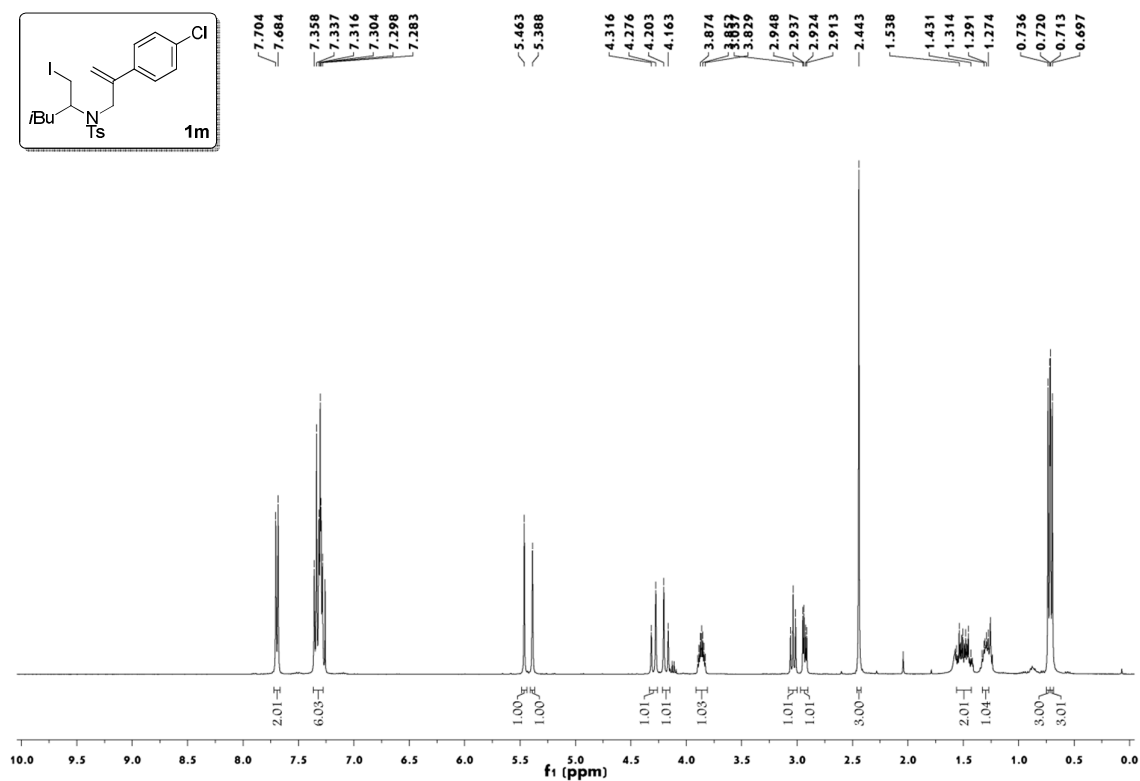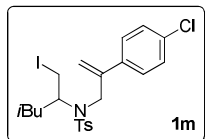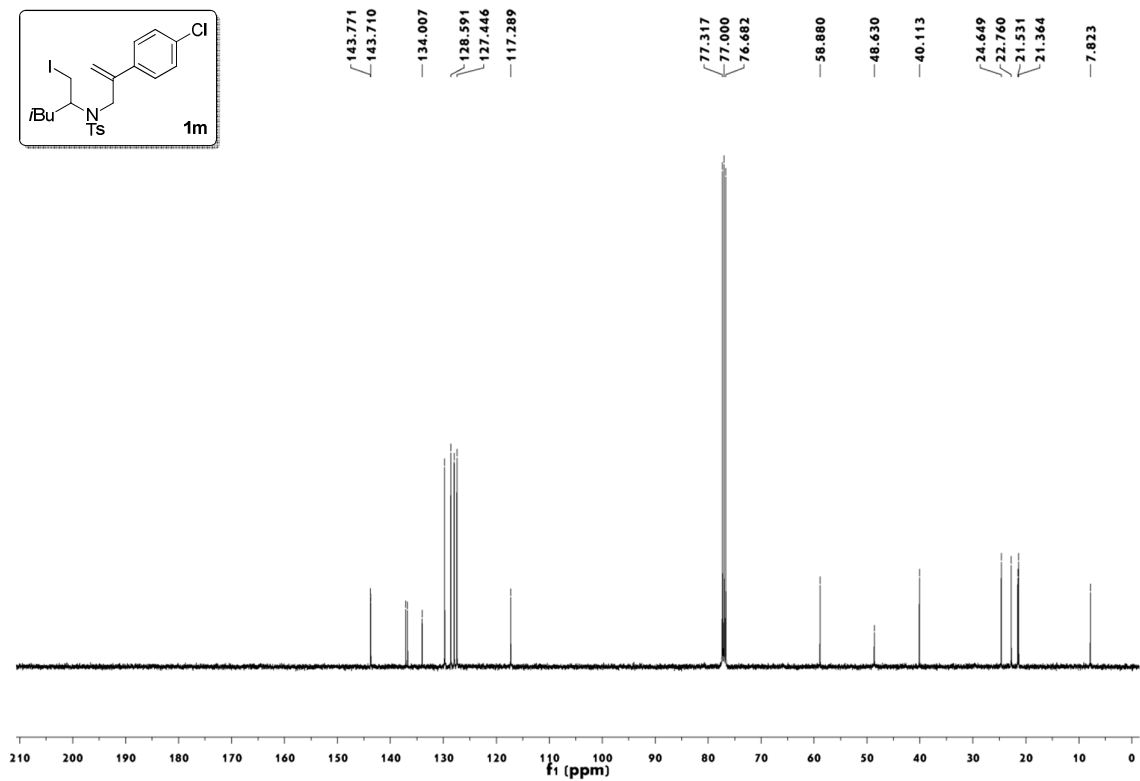

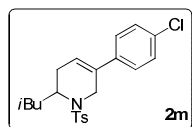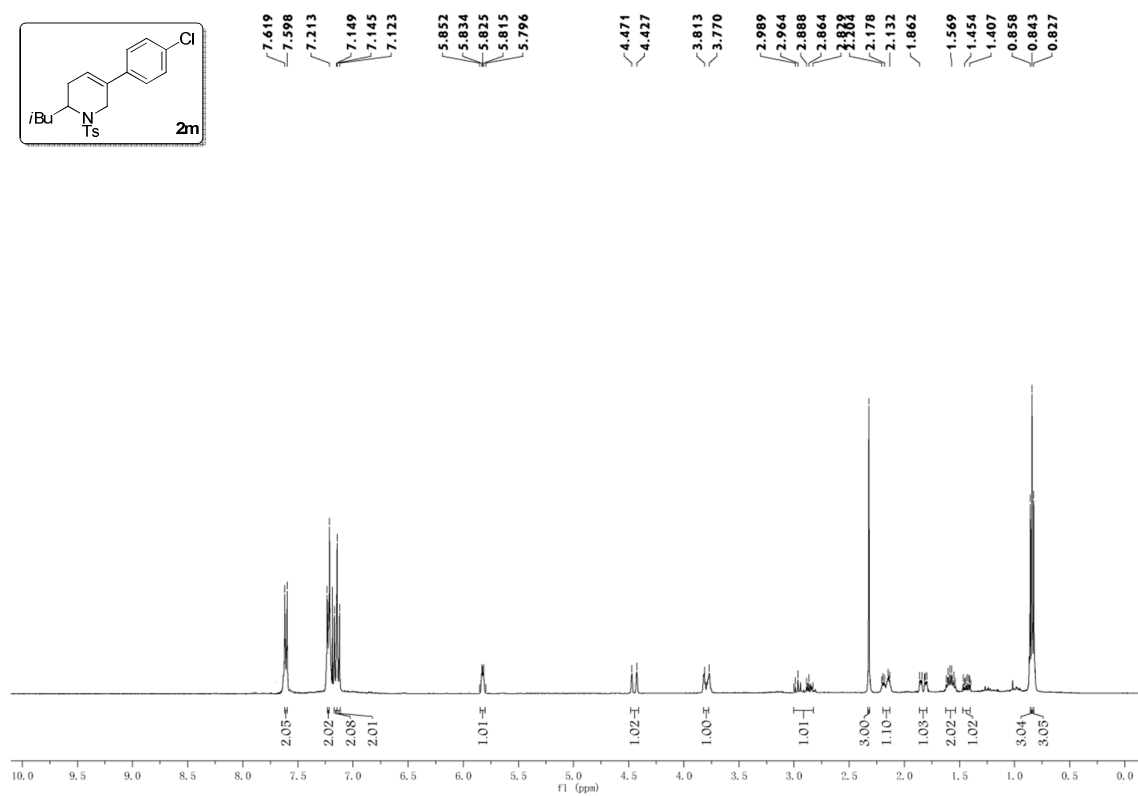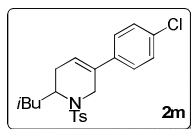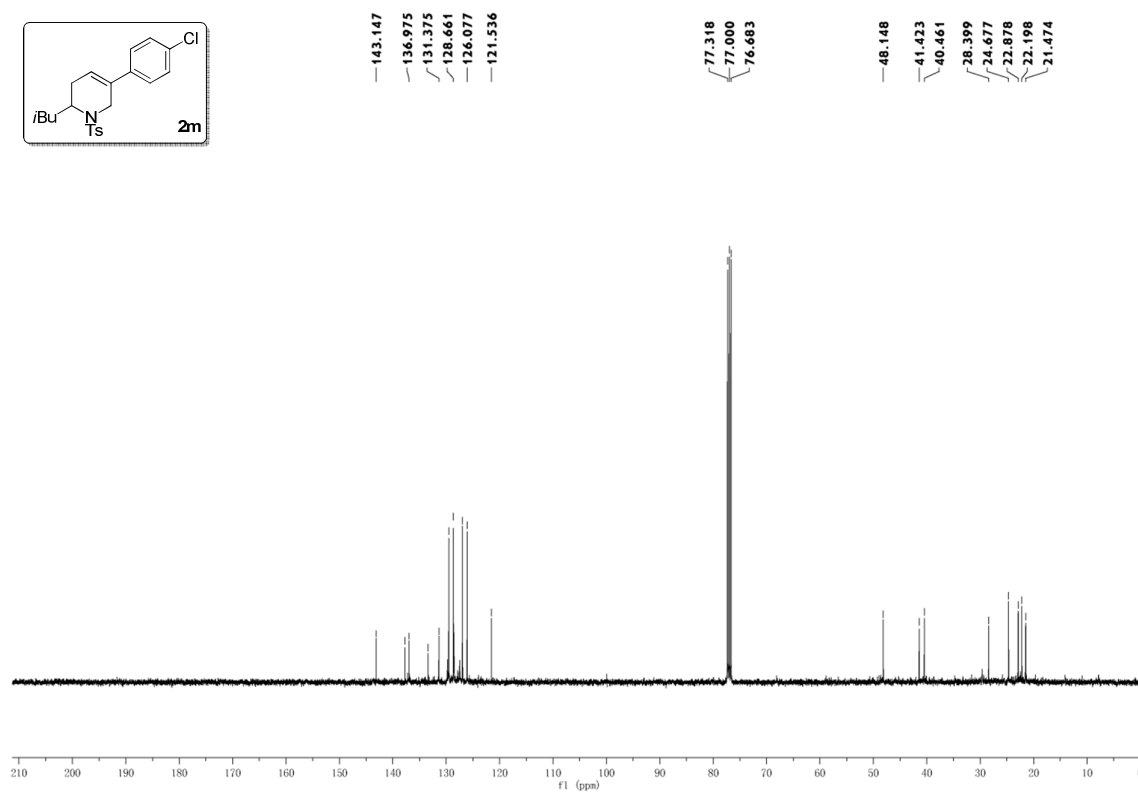



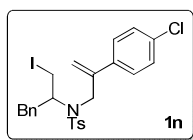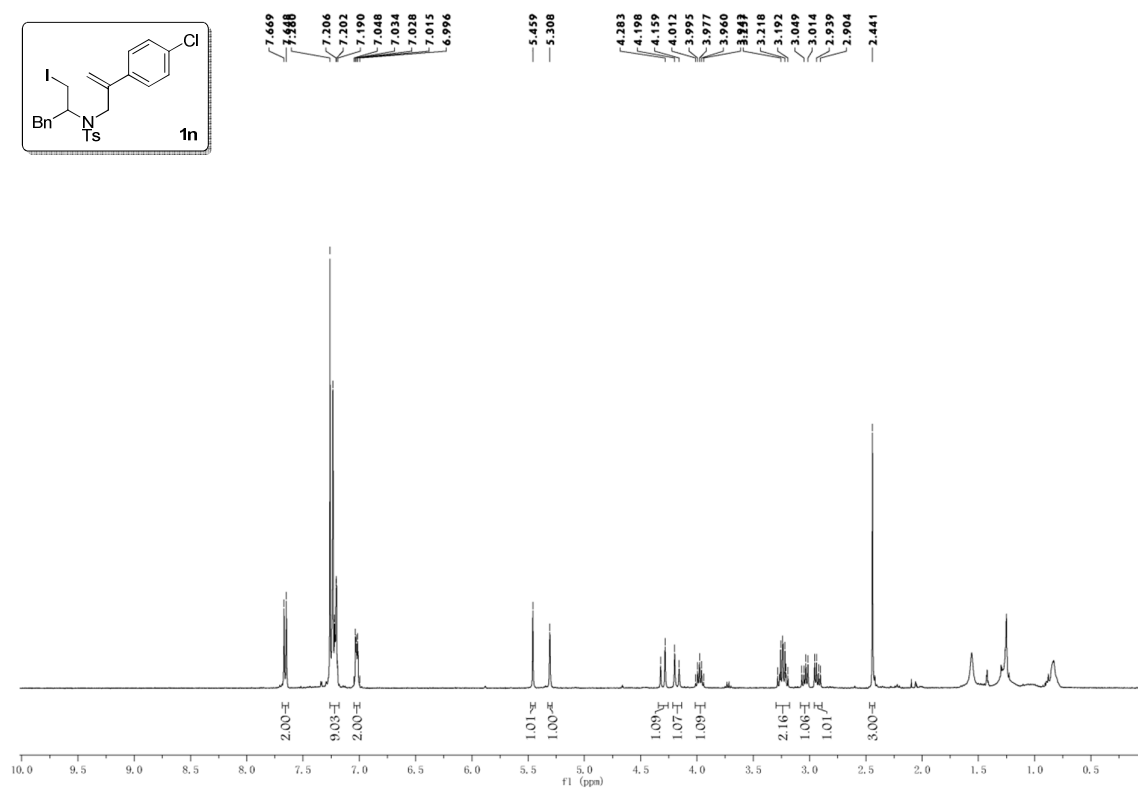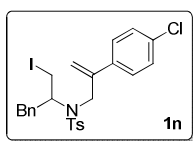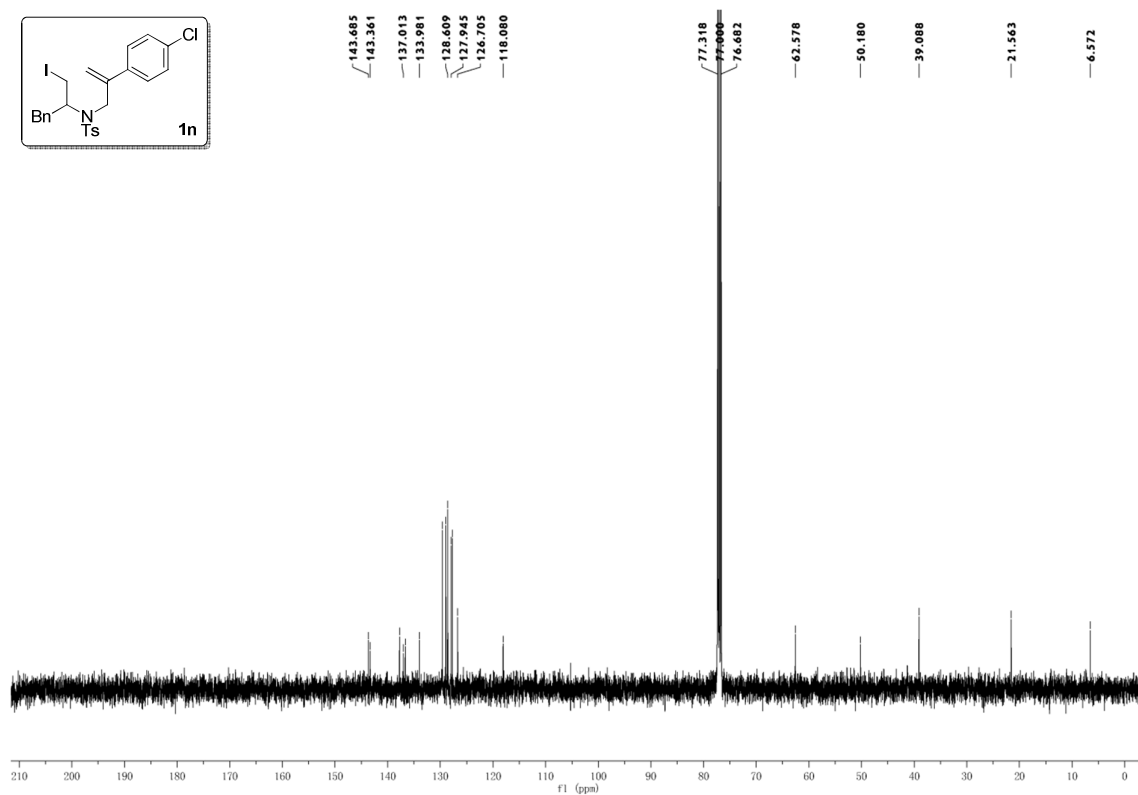

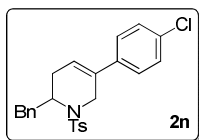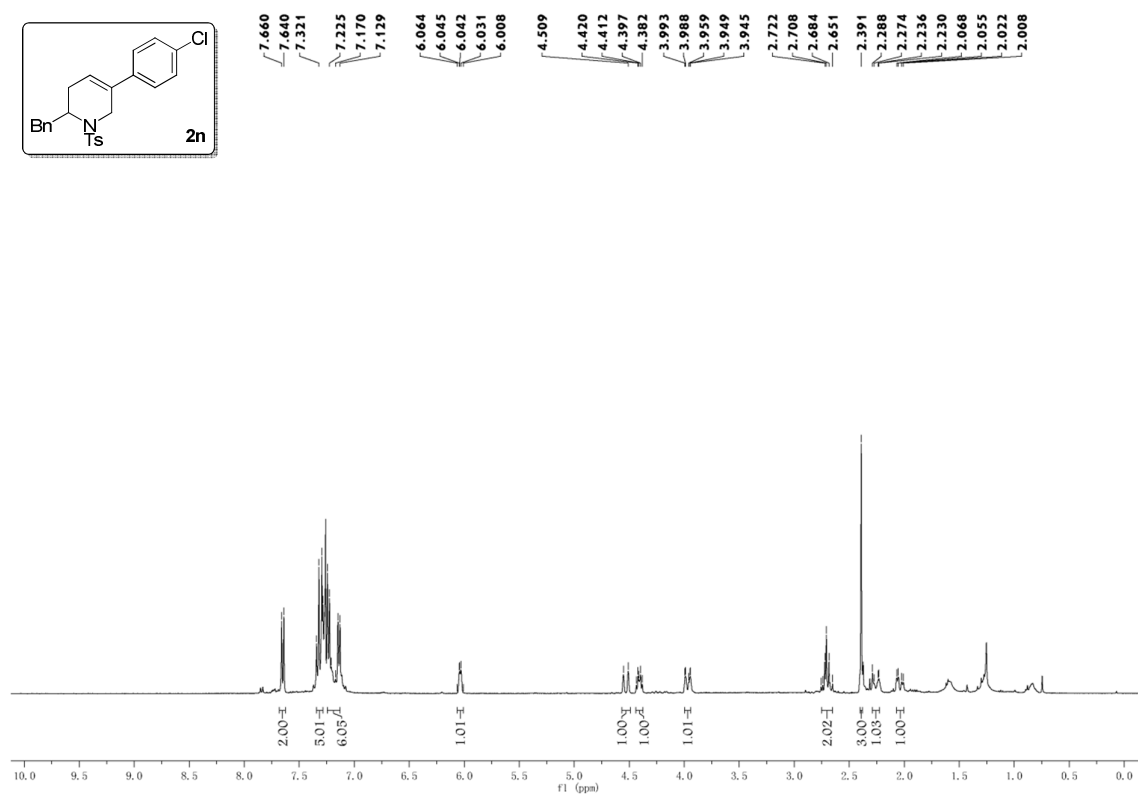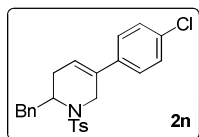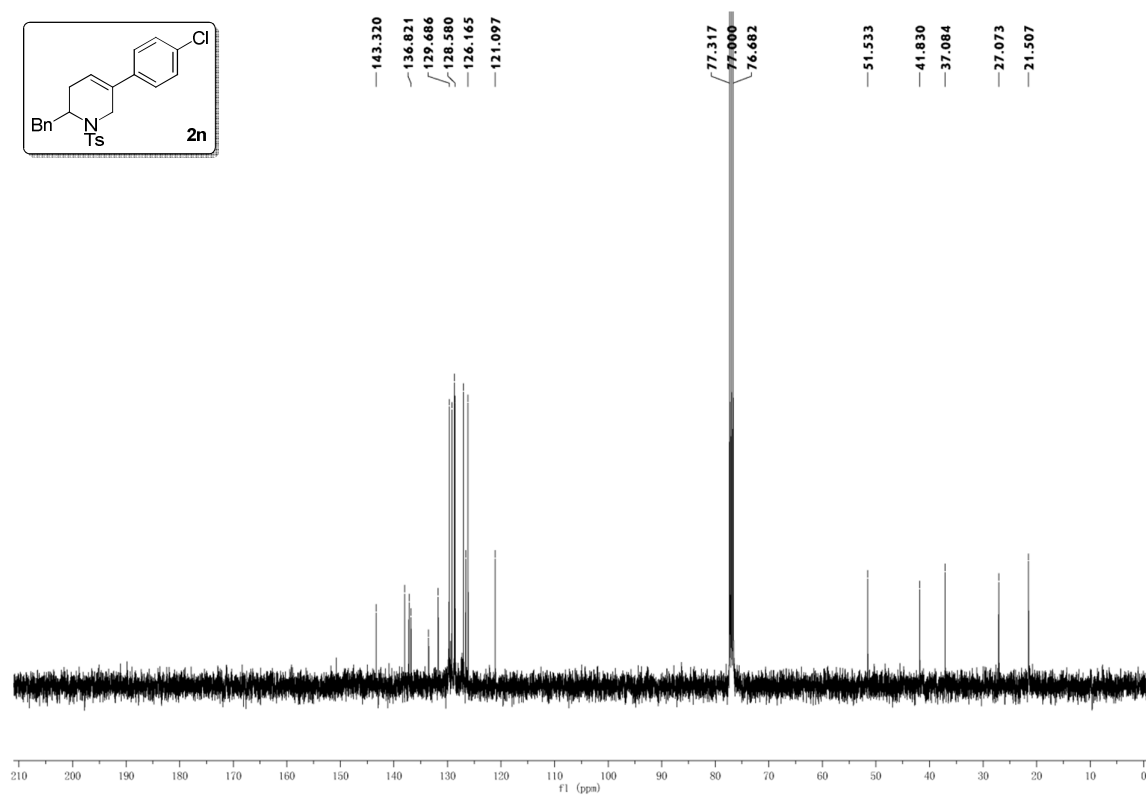

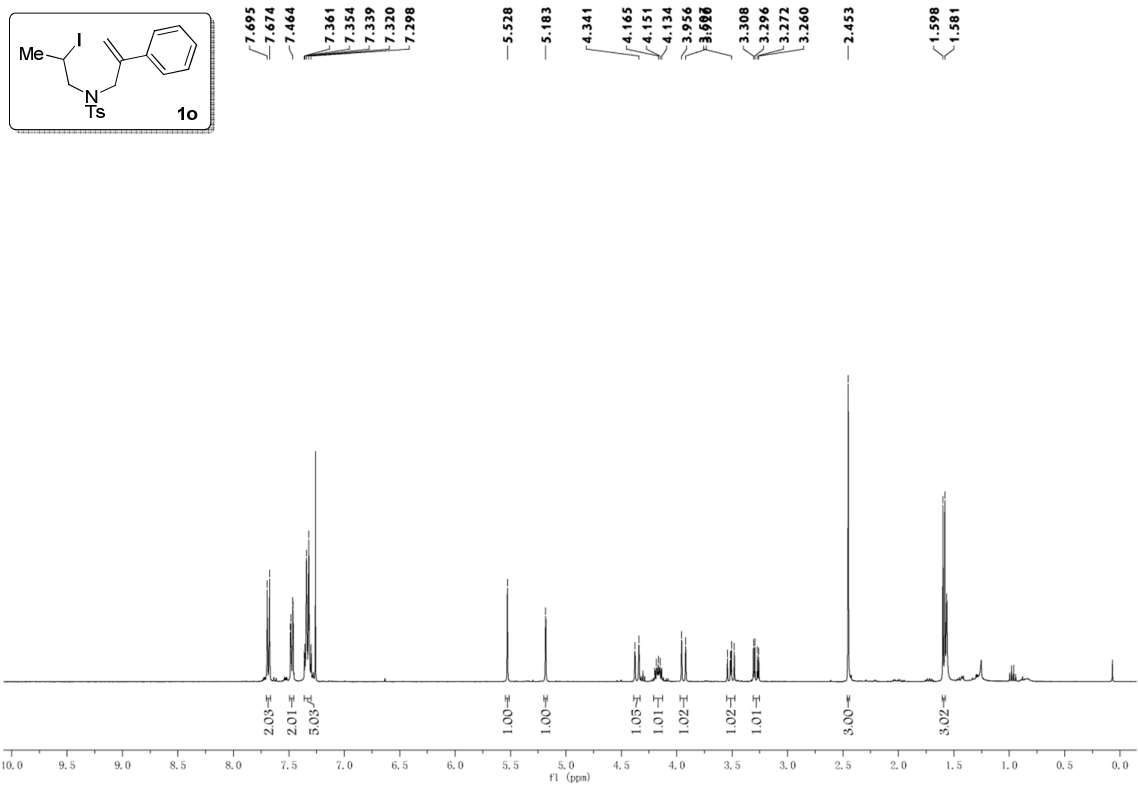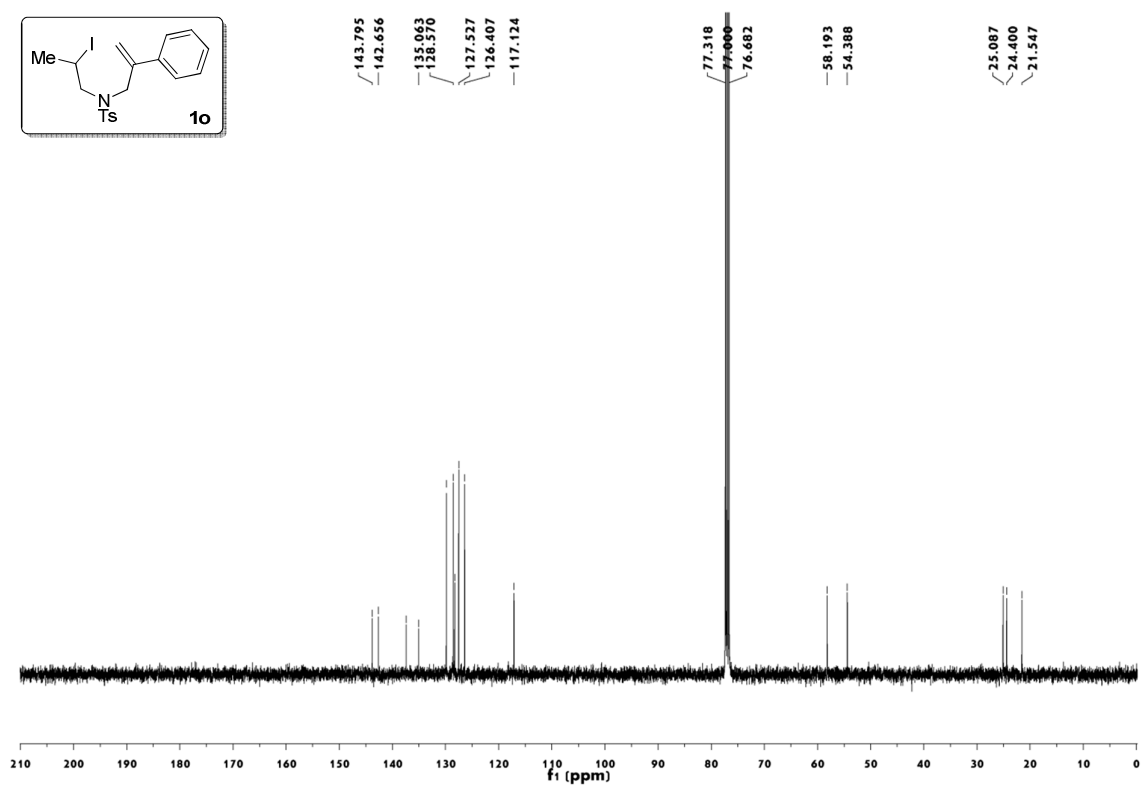

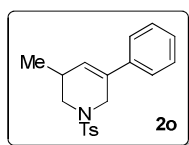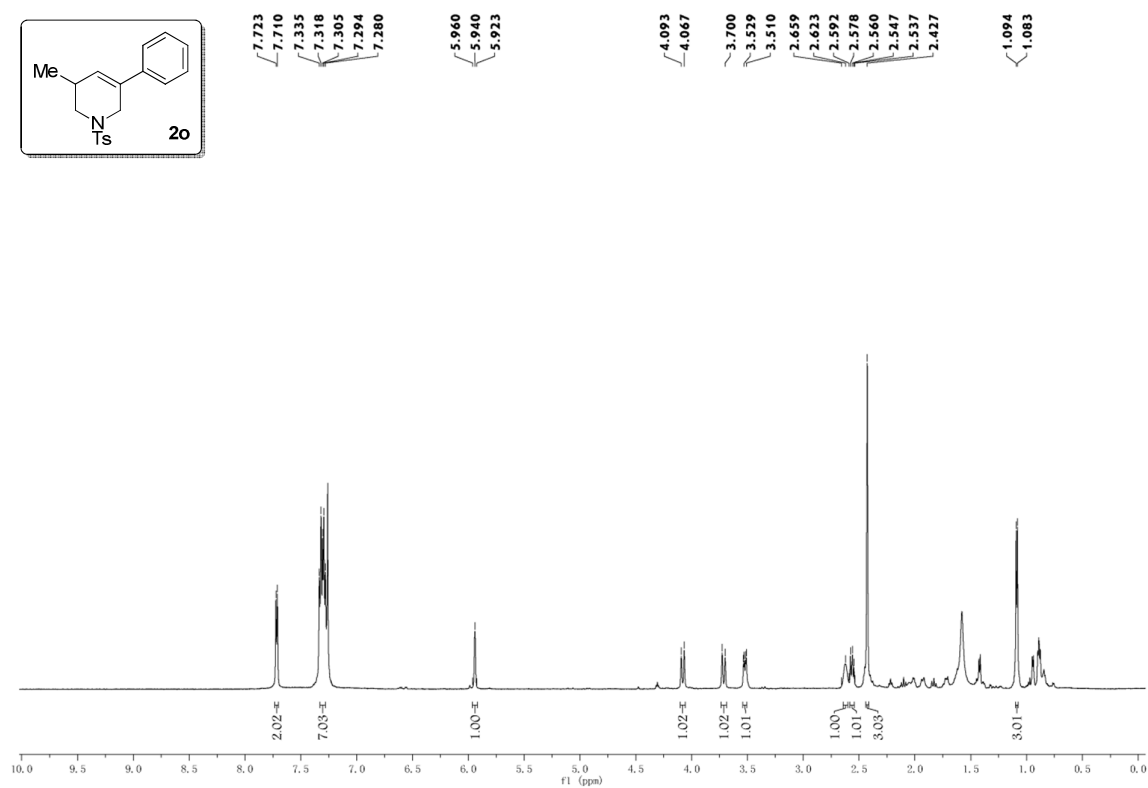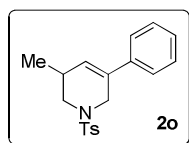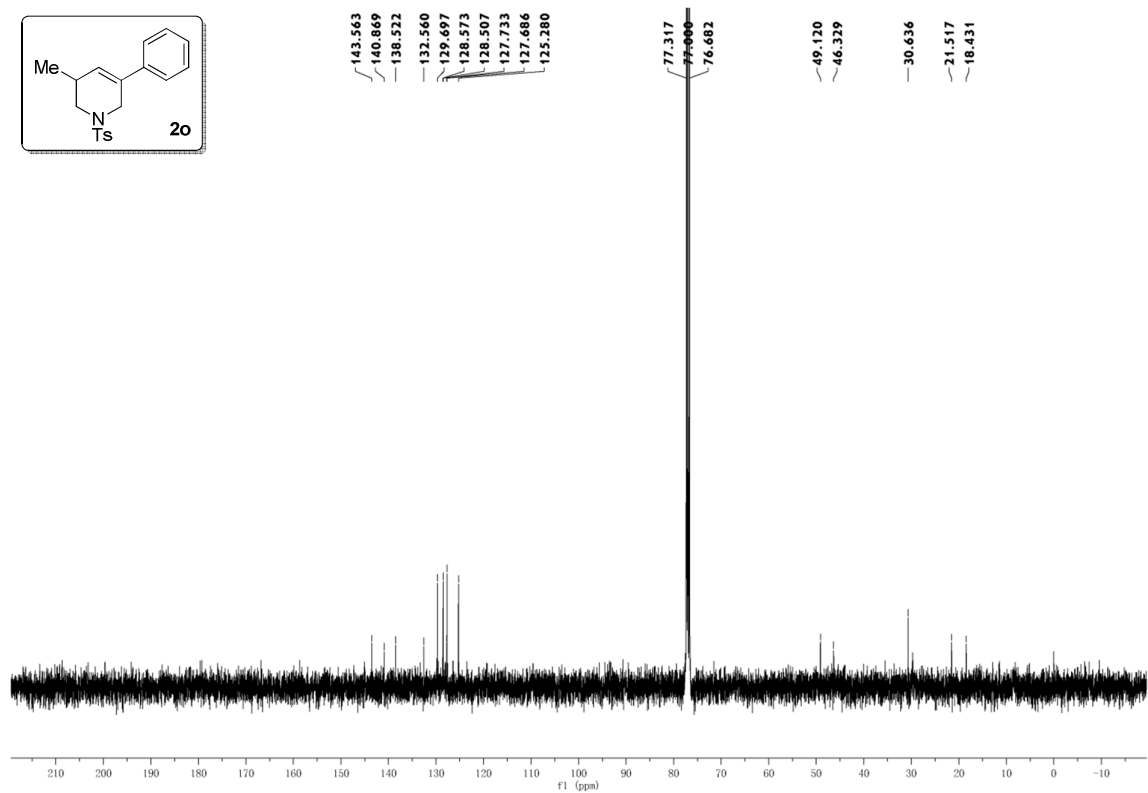

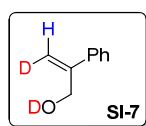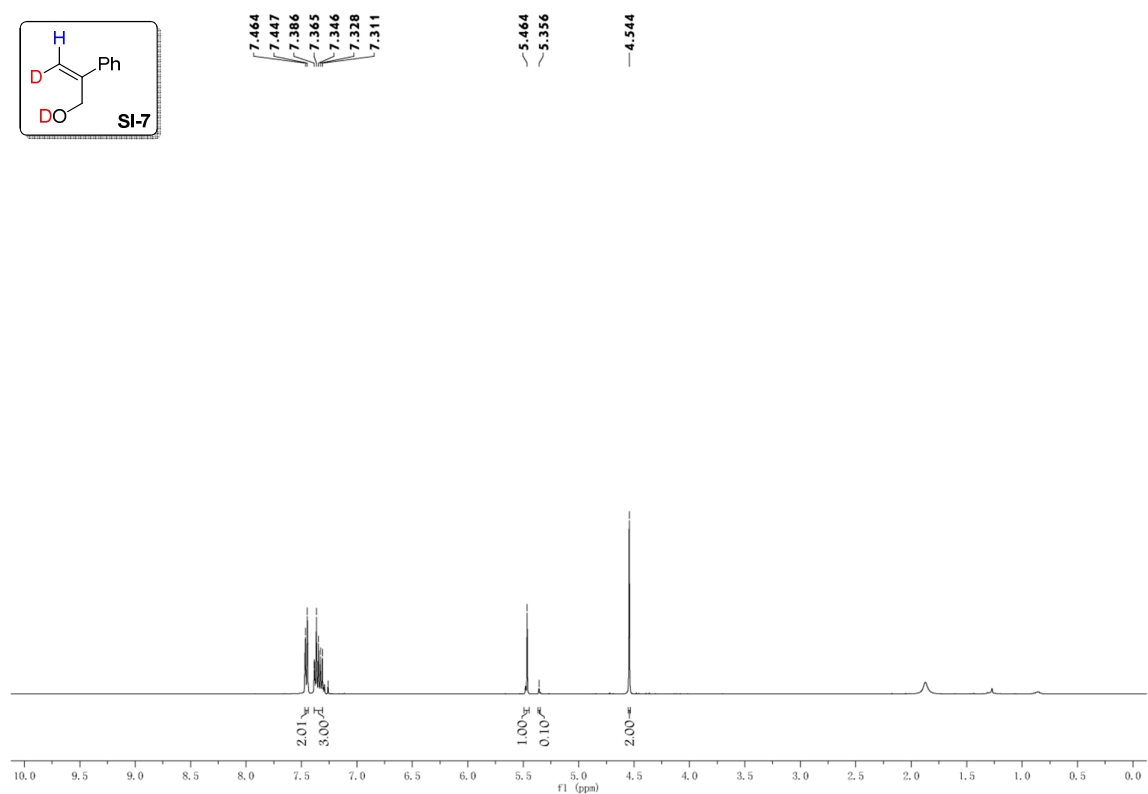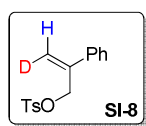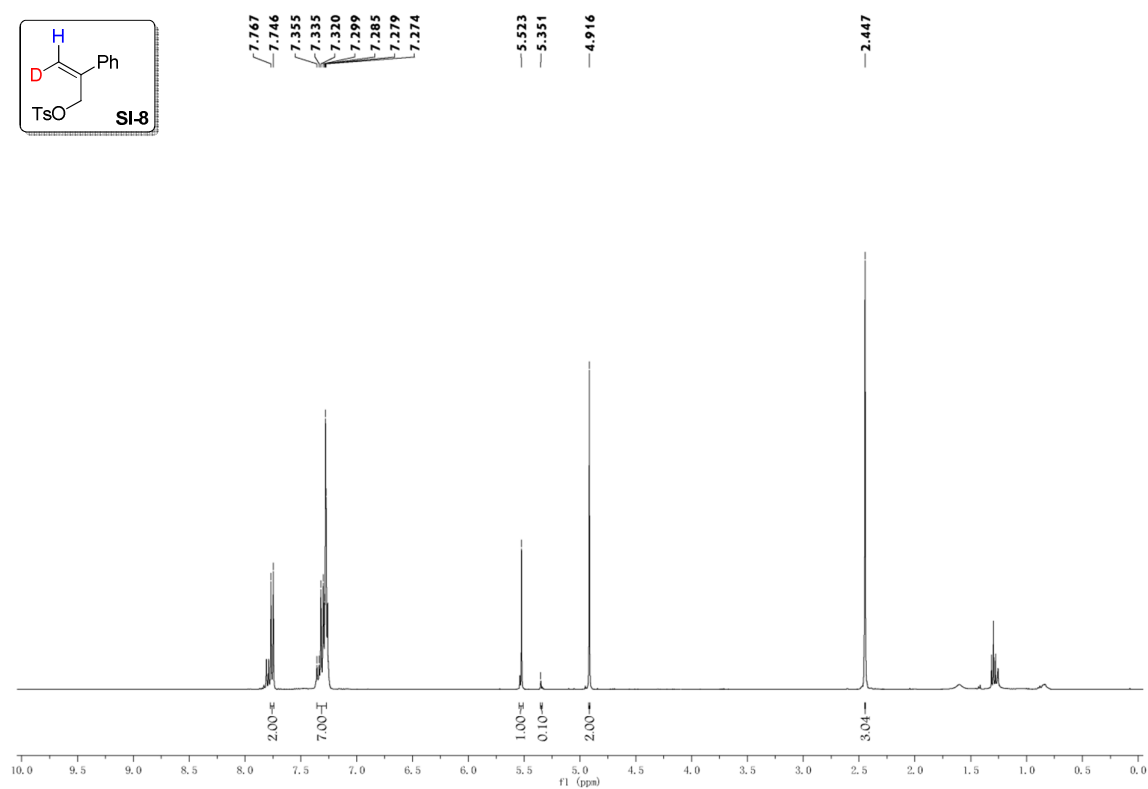

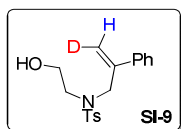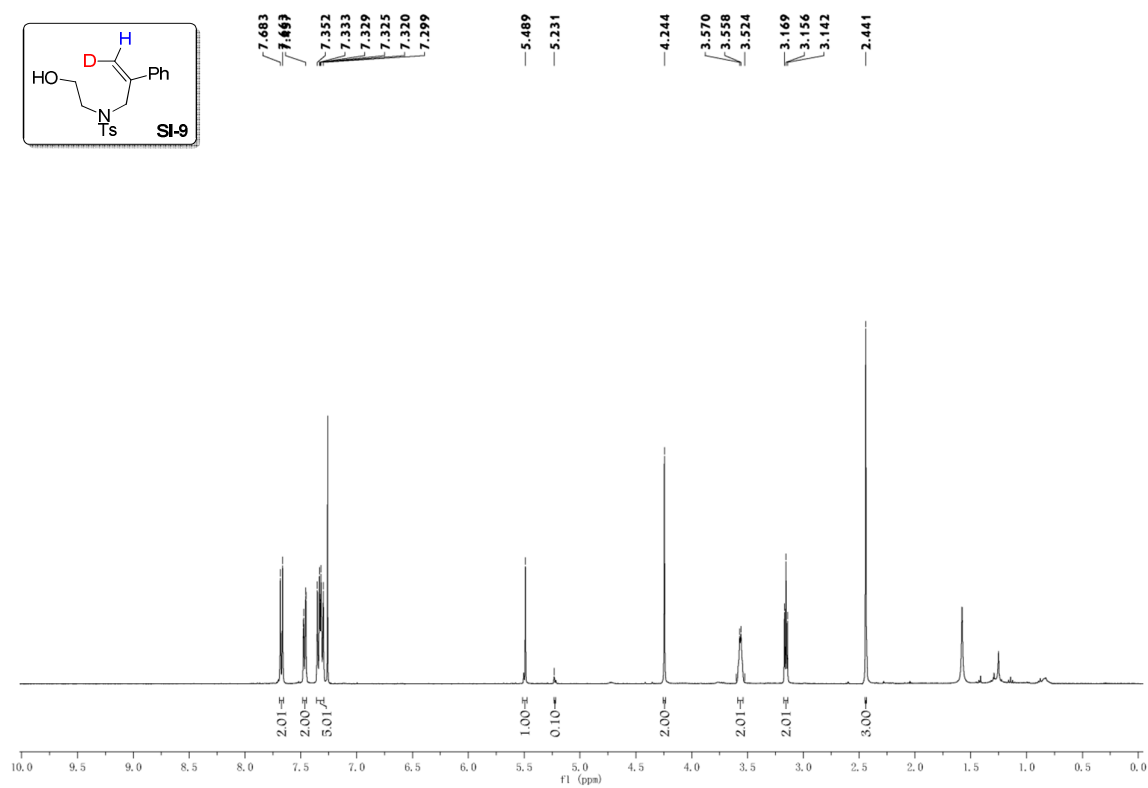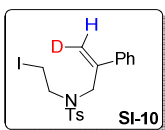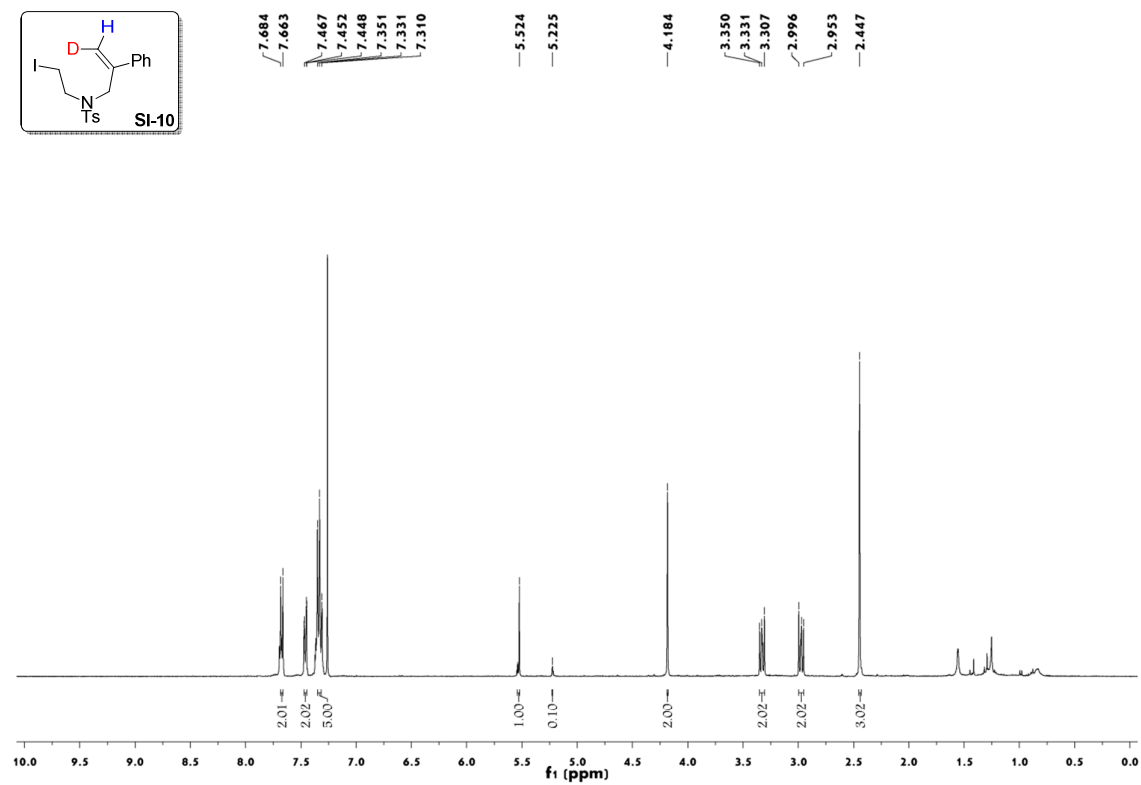

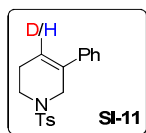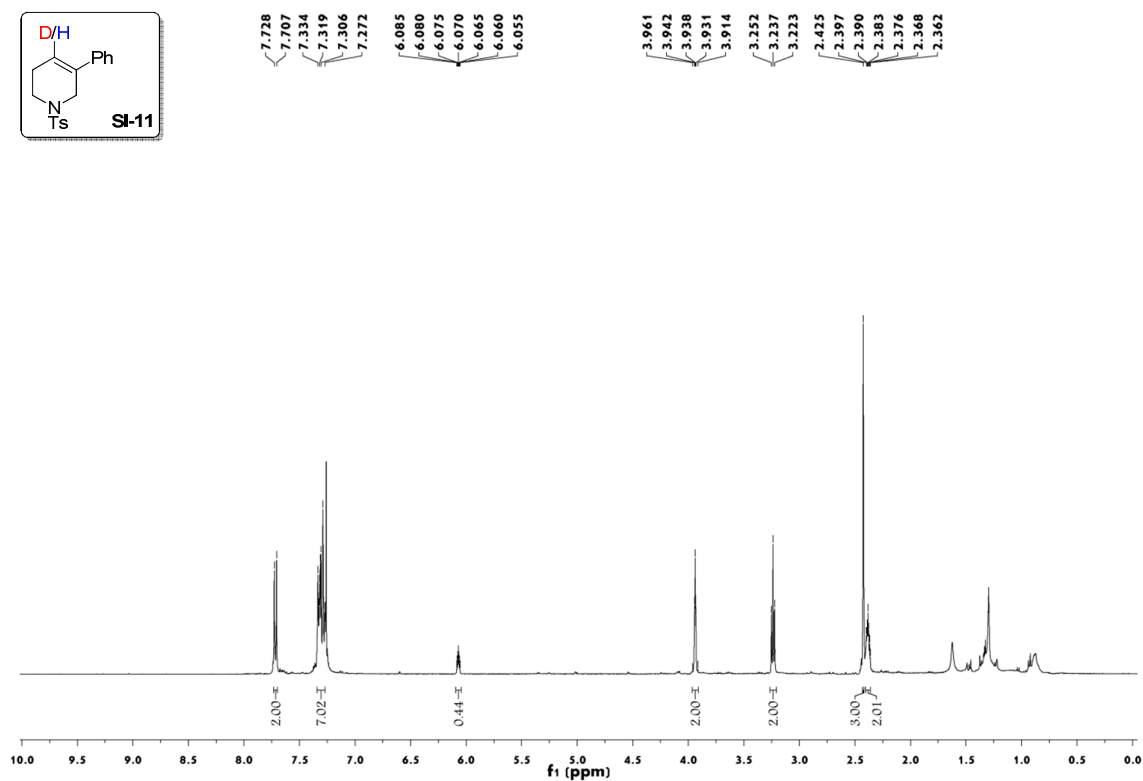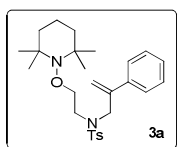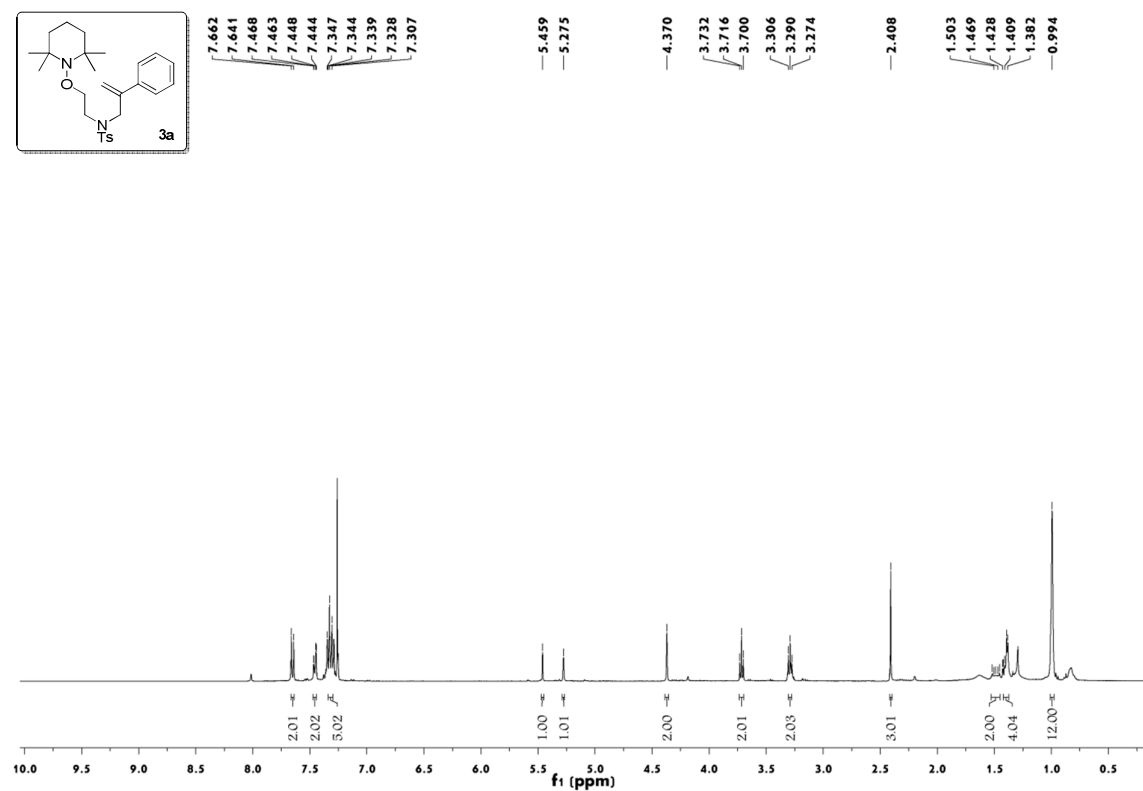

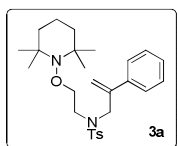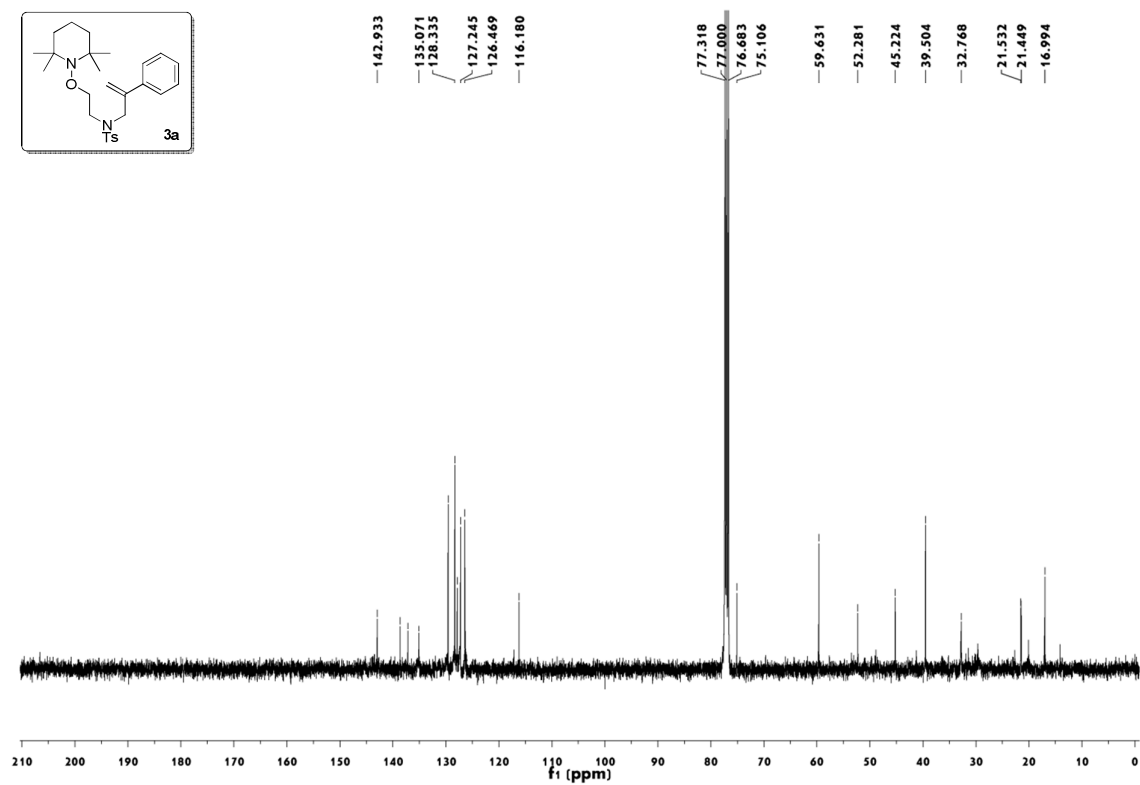

Supplement: Supplementary file 1 [file 5503688]
